# Supplementary material for: Characterization and comparison of milk fat globule membrane N-glycoproteomes from human and bovine colostrum and mature milk
Source: Royal Society of Chemistry journal article supplement (doi:10.1039/c9fo00686a), 2019-01-01
Supplement: c9fo00686a1.pdf [file c9fo00686a1.pdf]

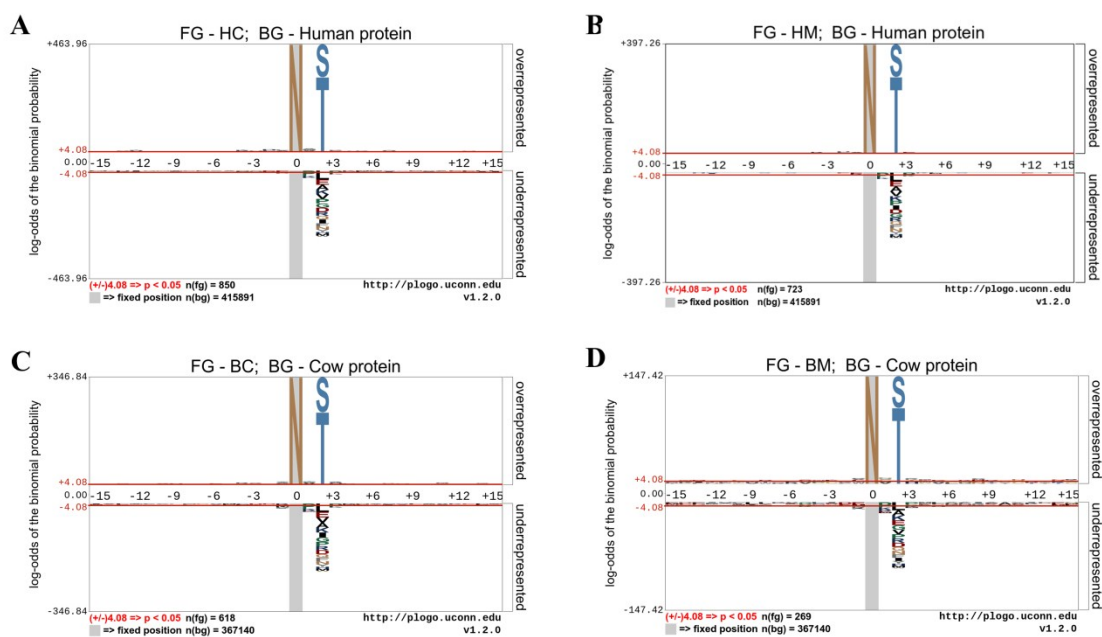

**Figure S1.** MFGM N-glycosylation consensus sequence in human colostrum (A), human mature milk (B), bovine colostrum (C), and bovine mature milk (D).
