# Supplementary material for: Characterization and comparison of milk fat globule membrane N-glycoproteomes from human and bovine colostrum and mature milk
Source: Royal Society of Chemistry journal article supplement (doi:10.1039/c9fo00686a), 2019-01-01
Supplement: c9fo00686a2.xlsx [file c9fo00686a2.xlsx]

## Sheet: Sheet1
Table S1. MFGM N-glycoproteomes identifed in human and bovine colostrum and mature milk.
Protein description	Positions	Known or Unknown of glycosites according to Uniprot database	Amino acid	Sequence window	Score	Charge	m/z	Mass error	Uniprot Accession	Intensity HC_1	Intensity HC_2	Intensity HC_3	Uniprot Accession	Intensity HM_1	Intensity HM_2	Intensity HM_3	Uniprot Accession	Intensity BC_1	Intensity BC_2	Intensity BC_3	Uniprot Accession	Intensity BM_1	Intensity BM_2	Intensity BM_3
1-acyl-sn-glycerol-3-phosphate acyltransferase alpha	184;184	U;U	N	QDVRVWVFPEGTRNHNGSMLPFKRGAFHLAV	157.75	2	574.276	0.20947	Q99943	D	D	D	Q99943		D	D	Q95JH2	D	D	D
4F2 cell-surface antigen heavy chain	424	K	N	GSTGEHTKSLVTQYLNATGNRWCSWSLSQAR	124.12	3	480.584	-0.75557	P08195	D	D	D	P08195	D	D	D
4F2 cell-surface antigen heavy chain	365	K	N	IENLKDASSFLAEWQNITKGFSEDRLLIAGT	148.41	3	775.721	0.33939	P08195	D	D	D	P08195	D	D	D
5'-nucleotidase	311	S	N	EKGNVVTSHGNPILLNSSIPEDPNIKADINK	253.23	2	1259.66	0.6667									Q05927	D	D	D	Q05927	D	D
5'-nucleotidase	53	S	N	HSRLEQTSEDSSKCVNASRCVGGVARLATKV	65.716	3	605.275	1.1806									Q05927		D	D	Q05927	D	D
5'-nucleotidase	403	S	N	ILNGGGIRSPIDERNNGTITWENLAAVLPFG	282.35	2	1411.24	0.3593									Q05927	D	D	D
5'-nucleotidase	333	S	N	PNIKADINKWRVKLDNYSTQELGKTIVYLDG	111.5	3	499.928	-0.1445									Q05927	D	D	D	Q05927		D	D
Acid ceramidase	259	K	N	KDAMWIGFLTRTVLENSTSYEEAKNLLTKTK	148.68	2	737.346	-0.098635	Q13510	D	D	D	Q13510	D	D	D
Acid ceramidase	259	S	N	KDAQWVGFIIRSVLENSTSYEETKNILTKTK	126.1	2	745.343	0.016375									Q17QB3	D	D	D
Acid sphingomyelinase-like phosphodiesterase 3b	343	S	N	DRATLSLKDMVTYFMNLSQANAQGTPRWELE	249.16	3	716.331	0.20378	Q92485	D	D	D	Q92485	D		D
Acid sphingomyelinase-like phosphodiesterase 3b	72	S	N	GPWGDYLCDSPWALINSSIYAMKEIEPEPDF	109.38	3	1467.33	-1.415					Q92485		D	D
ADAM like decysin 1	195	U	N	EHAILRYNQEELNPANHTCGVRNVGRKQDLI	80.387	3	635.62	0.46564									F1MJP4	D	D
ADAM metallopeptidase domain 9	119	U	N	ALSDCFGLRGLLHIENVSYGIEPLQNSSHFE	228.42	4	802.149	0.42499									F1MZJ5	D	D	D
ADAM metallopeptidase domain 9	129	U	N	LLHIENVSYGIEPLQNSSHFEHIFYRMDDVH	228.42	4	802.149	0.42499									F1MZJ5	D	D	D
ADAM metallopeptidase domain 9	611	U	N	TSCDVGKICRNFACVNVSVLNYDCDIQQKCH	167.92	2	1145.52	1.7904									F1MZJ5		D	D
ADAMTS-like protein 3	1574	S	N	GRAVRMQQRHTACQHNSSDSNCDDRKRPTLR	86.641	4	509.452	0.50345					P82987	D	D
ADAMTS-like protein 3	927	S	N	KRINLTIGSRAYLLPNTSVIIKCPVRRFQKS	77.593	2	667.894	0.089345					P82987	D	D	D
Adenosine receptor A1	159	S	N	FGWNNLSAVERAWAANGSMGEPVIKCEFEKV	81.619	2	725.35	-0.51541	P30542	D	D	D	P30542	D	D	D
Adhesion G protein-coupled receptor E1	710	U	N	LDIESKVIDKECTKENETFKLKAKGDEMKIW	79.201	4	436.714	-0.59742									E1BNX3	D	D	D
Adhesion G protein-coupled receptor E1	574	U	N	VVGFHPNPEGSWKHGNFSCQRIPFKCKDDVI	104.2	2	504.714	-0.36288									E1BNX3	D	D	D
Adhesion G protein-coupled receptor E2	41	S	N	SRGCARWCPQDSSCVNATACRCNPGFSSFSE	126.48	2	907.861	-0.54453	Q9UHX3	D	D	D	Q9UHX3		D	D
Adhesion G protein-coupled receptor E3	103	U	N	HCIDGYKLLSGKAQFNNSNENTCQKITPSKT	142.91	2	779.328	-0.1729									G5E538	D	D	D
Adhesion G protein-coupled receptor E3	32	U	N	TKGTCTHCPQNAFCVNATHCTCNHGYRSESK	122.73	4	757.302	-0.18334									G5E538	D	D		G5E538	D		D
Adhesion G protein-coupled receptor G6	719	U	N	EEDSVLVKRAQFTFFNKTGLFQDVGTKKGTL;PEDSVLVRRAQFTFFNKTGLFQDVGPQRKTL	111.74	2	503.25	0.17846									F1MJV6	D		D
Adhesion G protein-coupled receptor G6	291	U	N	NFRLWNFTISSKILSNLSCSVKGNVVDWQND	78.342	2	562.299	0.1365									F1MJV6	D	D	D
Adhesion G protein-coupled receptor G6	245	U	N	SVGVNFKRNYGTVSCNSSMGKVIPGNGKLLL	128.54	2	704.292	-0.27576									F1MJV6	D	D	D
Adhesion G-protein coupled receptor F1	455	S	N	QLKRGYSYQIKMCPQNTSIPIRGRVLIGSDQ	120.06	2	668.318	0.9709					Q5T601	D	D	D
Adhesion G-protein coupled receptor F1	168	S	N	WGTFKINERFTNDLLNSSSAIYSKYANGIEI	147.7	2	831.909	0.10045	Q5T601	D	D	D	Q5T601	D	D	D
Adhesion G-protein coupled receptor G2	99	S	N	SNETEKTKITIVKTFNASGVKPQRNICNLSS	103.34	2	604.319	-0.53875	Q8IZP9	D		D	Q8IZP9	D	D	D
Adipocyte plasma membrane-associated protein	160	K	N	DEPVCGRPLGIRAGPNGTLFVADAYKGLFEV	234.41	2	713.859	0.079568	Q9HDC9	D	D	D	Q9HDC9	D	D	D
Adipocyte plasma membrane-associated protein	196	K	N	EVKLLLSSETPIEGKNMSFVNDLTVTQDGRK	185.26	2	914.443	0.71537	Q9HDC9	D	D	D	Q9HDC9	D	D	D
Adipocyte plasma membrane-associated protein	159	S	N	DEPACGRPLGIRAGPNGTLFVVDAYKGLFEV	103.21	2	727.874	-0.11528									Q3T0E5	D	D	D	Q3T0E5	D	D	D
ADP-ribosyl cyclase/cyclic ADP-ribose hydrolase 2	192	K	N	IQYSKDSSGVIHVMLNGSEPTGAYPIKGFFA	133.38	2	1138.06	-0.090776	Q10588	D	D	D
ADP-ribosyl cyclase/cyclic ADP-ribose hydrolase 2	66	S	N	RNSREPPVLHTTQNKNCTAIWEAFKVALDKD	121.76	2	742.858	0.82069	Q10588	D	D	D
Afamin	33	K	N	ESLTLPTQPRDIENFNSTQKFIEDNIEYITI	97.456	2	599.777	0.69035	P43652	D	D	D	P43652		D	D
Agrin	135;126	K;U	N	APPYLWPAHKNELMLNSSLMRITLRNLEEVE	163.9	2	655.82	0.21038	O00468	D	D	D					F1MSI2	D	D	D
Alkaline phosphatase, tissue-nonspecific isozyme	430;430	K;S	N	YGNGPGYKVVGGERENVSMVDYAHNNYQAQS	170.91	3	837.06	0.0049426									P09487	D	D	D
Alkaline phosphatase, tissue-nonspecific isozyme	230	S	N	IDVIMGGGRKYMYPKNKTDVEYESDEKARGT	131.66	2	730.32	0.095973					P05186	D	D	D
Alkaline phosphatase, tissue-nonspecific isozyme	140	S	N	EGTVGVSAATQRSQCNTTQGNEVTSILRWAK	213.94	2	907.422	3.0337									P09487	D	D	D	P09487	D	D
Alkaline phosphatase, tissue-nonspecific isozyme	303	S	N	GLFEPGDMQYELNRNNATDPSLSEMVEMAIR	176.04	2	940.934	-0.34202									P09487	D	D	D	P09487	D	D	D
Alkaline phosphatase, tissue-nonspecific isozyme	271	S	N	WKSFKPKHKHSHYVWNRTDLLALDPHSVDYL	133.81	3	367.842	0.33149									P09487		D	D	P09487	D	D	D
Allergin-1	89	S	N	THLGTQDGKGEPAIFNLSITEAHESGPYKCK	69.922	3	721.688	0.63209					Q7Z6M3		D	D
Alpha-(1,3)-fucosyltransferase 6	91	S	N	ALPRCSEMVPGTADCNITADRKVYPQADAVI	121.27	2	1014.44	-0.079743	P51993	D	D	D	P51993	D	D	D
Alpha-(1,3)-fucosyltransferase 6	46	S	N	FSYLRVSQDDPTVYPNGSRFPDSTGTPAHSI	110.55	2	769.354	-1.6939	P51993	D		D	P51993	D	D	D
Alpha-1,2-mannosyltransferase ALG9	465	U	N	ATDPTIHTVPEGRPVNVCVGKEWYRFPSSFL	72.086	4	591.562	0.67926	Q9H6U8		D	D	Q9H6U8	D	D
Alpha-1-acid glycoprotein 1	103	K	N	DQCIYNTTYLNVQRENGTISRYVGGQEHFAH	98.299	2	390.193	-0.31098	P02763	D	D	D
Alpha-1-acid glycoprotein 1	93	K	N	IFLREYQTRQDQCIYNTTYLNVQRENGTISR	227.47	3	640.3	-0.27889	P02763	D	D	D	P02763		D	D
Alpha-1-acid glycoprotein 1	94	S	N	LITREYQTIEDKCVYNCSFIKIYRQNGTLSK	70.908	2	597.264	-0.51782									Q3SZR3	D	D	D	Q3SZR3	D	D
Alpha-1-acid glycoprotein 1	136	S	N	LLSKHFRTFMLAASWNGTKNVGVSFYADKPE	223.31	2	673.321	0.32383									Q3SZR3	D	D	D
Alpha-1-acid glycoprotein 2	93	K	N	IFLREYQTRQNQCFYNSSYLNVQRENGTVSR	146.47	2	962.431	-4.5031	P19652	D	D	D
Alpha-1-antichymotrypsin	106	K	N	AHNTTLTEILKGLKFNLTETSEAEIHQSFQH	284.78	4	601.551	0.23146	P01011	D	D	D	P01011	D	D	D
Alpha-1-antichymotrypsin	271	K	N	DEELSCTVVELKYTGNASALFILPDQDKMEE	237.46	3	585.961	0.5026	P01011	D	D	D	P01011	D	D	D
Alpha-1-antichymotrypsin	127	K	N	EAEIHQSFQHLLRTLNQSSDELQLSMGNAMF	212.83	2	1124.52	1.0052	P01011	D	D	D	P01011	D	D	D
Alpha-1-antichymotrypsin	186	K	N	QDSAAAKKLINDYVKNGTRGKITDLIKDLDS	107.09	3	475.264	0.32133	P01011	D	D	D	P01011	D	D	D
Alpha-1-antiproteinase	105	S	N	AKGNTHTEILKGLGFNLTELAEAEIHKGFQH	180.78	3	582.305	-0.22883									P34955	D	D	D	P34955	D	D
Alpha-1-antiproteinase	143	S	N	PNHQLQLTTGNGLFINESAKLVDTFLEDVKN	178.02	5	696.16	-0.59736									P34955	D	D	D
Alpha-1-antitrypsin	271	K	N	CKKLSSWVLLMKYLGNATAIFFLPDEGKLQH	157.8	3	586.966	-0.10981	P01009	D	D	D	P01009	D	D	D
Alpha-1B-glycoprotein	179	K	N	AQEDVEATFPVHQPGNYSCSYRTDGEGALSE	225.84	3	1280.56	0.086018	P04217	D	D	D	P04217	D	D	D
Alpha-1B-glycoprotein	182	S	N	APEATQATFPVHRAGNYSCSYRTHAAGTPSE	180.8	2	540.719	-0.6453									Q2KJF1	D	D	D
Alpha-1B-glycoprotein	379	S	N	EAQFELRGVSAVDSGNYSCVYVDTSPPFAGS	196.2	2	1284.08	0.15455									Q2KJF1		D	D
Alpha-2-antiplasmin	296	K	N	LEQPEIQVAHFPFKNNMSFVVLMPTRFEWNA	166.7	2	714.349	-1.4055									P28800	D	D	D	P28800	D	D
Alpha-2-antiplasmin	317	K	N	LMPTRFEWNASQVLANLTWDILHQPSLSERP	247.54	3	1096.22	-0.14197									P28800	D	D
Alpha-2-antiplasmin	310	K	N	NNMSFVVLMPTRFEWNASQVLANLTWDILHQ	247.54	3	1096.22	-0.14197									P28800	D	D
Alpha-2-HS-glycoprotein	156	K	N	DVRKVCQDCPLLAPLNDTRVVHAAKAALAAF	149.6	2	887.921	0.66058	P02765	D	D	D	P02765	D	D	D
Alpha-2-HS-glycoprotein	156	K	N	DVRKLCPDCPLLAPLNDSRVVHAVEVALATF	176.94	2	872.418	-0.51078									P12763	D	D	D	P12763	D		D
Alpha-2-HS-glycoprotein	99	K	N	TLETTCHVLDPTPLANCSVRQQTQHAVEGDC	300.5	3	1225.59	-0.30282									P12763	D	D	D
Alpha-2-HS-glycoprotein	176	K	N	VHAVEVALATFNAESNGSYLQLVEISRAQFV	181.37	3	1008.19	4.5536									P12763	D	D	D
Alpha-2-macroglobulin	1460	By similarity	N	EVSNNHVLIYLDKVTNETLTLTFTVLQDIPV	118.72	3	721.731	0.73565									Q7SIH1		D	D
Alpha-2-macroglobulin receptor-associated protein	268	K	N	EEPRVIDLWDLAQSANLTDKELEAFREELKH	217.87	4	763.146	0.34685	P30533	D	D	D	P30533	D	D	D
Alpha-galactosidase A	192	K	N	LENLADGYKHMSLALNRTGRSIVYSCEWPLY	101.33	2	472.747	0.2172	P06280	D	D	D
Alpha-lactalbumin	90	K atypical	N	SNKLWCKSSQVPQSRNICDISCDKFLDDDIT	88.392	2	564.233	0.27268	P00709	D	D	D	P00709	D	D	D
Alpha-lactalbumin	93	U	N	IWCKDDQNPHSSNICNISCDKFLDDDLTDDI	373.09	2	1005.4	1.2962									P00711	D	D	D	P00711	D	D	D
Alpha-L-iduronidase	372	K	N	PHPFAQRTLTARFQVNNTRPPHVQLLRKPVL	82.55	4	457.002	-0.47731					P35475		D	D
Alpha-mannosidase	1093	U	N	RKGFDCGLEAKNLGFNCTTSQGKVALGSLFH	84.169	2	665.303	-0.40323									E1BGJ4	D	D	D
Alpha-N-acetylgalactosaminide alpha-2,6-sialyltransferase 6	173	U	N	HSSVFRVLRRPQEFVNRTPETVFIFWGPPSK	117.4	2	524.775	-0.2988	Q969X2	D	D	D	Q969X2	D	D	D
Alpha-N-acetylglucosaminidase	503	K	N	PDAGAAWRLLLRSVYNCSGEACRGHNRSPLV	131.83	2	653.258	-1.0687	P54802	D	D	D	P54802	D	D	D
Alpha-N-acetylglucosaminidase	503	U	N	GDAEAAWRLLLRSVYNCSGEECRGHNHSPLV	120.96	2	682.261	-0.052883									A6QM01	D	D	D
Alpha-S1-casein	69	U	N	NILREKQTDEIKDTRNESTQNCVVAEPEKME	259.93	2	805.853	0.79243	P47710	D	D	D	P47710	D	D	D
Amiloride-sensitive sodium channel subunit beta	484	U	N	DWIFHVLSQERDQSTNITLSRKGIVKLNIYF	84.687	2	569.285	0.69532	P51168	D	D	D	P51168	D	D	D
Amiloride-sensitive sodium channel subunit beta	135	U	N	EAVLERILAPELSHANATRNLNFSIWNHTPL	92.856	3	465.921	0.29058	P51168		D	D	P51168		D	D
Amine oxidase [flavin-containing]	270	U	N	FSEITGGFDQLPKALNASLKPGTIRLGSKVE	96.103	2	622.366	1.1878									F1MZA0	D	D	D
Amine oxidase [flavin-containing]	195	U	N	LFYQSIGKLKSLKELNCSHLMSFYDSYSTKA	188.41	3	695.632	0.06394									F1MZA0	D	D	D
Amine oxidase [flavin-containing]	357	U	N	RSVHYTSATKVVLACNESFWERDGIQGGVSI	117.23	2	756.856	-0.248									F1MZA0		D	D
Aminopeptidase N	128	K	N	CKEATDVIIIHSKKLNYTLSQGHRVVLRGVG	202.05	2	596.304	0.031406	P15144	D	D	D	P15144	D	D	D
Aminopeptidase N	681	K	N	FNLASAHKVPVTLALNNTLFLIEERQYMPWE	162.41	2	973.048	0.34546	P15144	D	D	D
Aminopeptidase N	234	K	N	KSFPCFDEPAMKAEFNITLIHPKDLTALSNM	88.187	3	429.239	-0.065814	P15144	D	D	D	P15144	D	D	D
Aminopeptidase N	265	K	N	LPKGPSTPLPEDPNWNVTEFHTTPKMSTYLL	203.71	3	823.06	0.24446	P15144	D	D	D	P15144	D	D	D
Aminopeptidase N	818	K	N	QGGEEEWDFAWEQFRNATLVNEADKLRAALA	122.39	2	673.862	-0.61193	P15144	D	D	D	P15144	D	D	D
Amyloid beta A4 protein	542	K	N	RSQVMTHLRVIYERMNQSLSLLYNVPAVAEE	113.13	3	1064.54	0.97511	P05067		D	D
Amyloid-like protein 2	541	U	N	KSQVMTHLHVIEERRNQSLSLLYKVPYVAQE	64.439	2	612.845	0.072673	Q06481		D	D
Angiopoietin-related protein 4	177	S	N	RKRLPEMAQPVDPAHNVSRLHRLPRDCQELF	152.37	4	484.745	0.82552	Q9BY76	D	D	D	Q9BY76	D	D	D
Angiopoietin-related protein 4	184	S	N	RKRLPKMAQLAGPAHNISRLHRLPRDCQELF	75.462	3	456.903	-0.15927									Q2KJ51	D	D	D
Angiotensin-converting enzyme	509	K	N	YLRTKYQGICPPVTRNETHFDAGAKFHVPNV;YLRTKYQGICPPVVRNETHFDAGAKFHVPNV	143.97	2	546.746	0.20191	P12821	D	D	D	P12821	D	D	D
Angiotensin-converting enzyme	111	K	N	AWGQKAKELYEPIWQNFTDPQLRRIIGAVRT	160.47	3	684.67	0.077983	P12821	D	D	D	P12821	D	D	D
Angiotensin-converting enzyme	942	K	N	FFTSLGLLPVPPEFWNKSMLEKPTDGREVVC	144.27	2	1213.1	-1.5466	P12821		D	D	P12821	D	D	D
Angiotensin-converting enzyme	714	K	N	KYGTQARKFDVNQLQNTTIKRIIKKVQDLER	283.45	3	569.981	-0.19627	P12821	D	D	D	P12821	D	D	D
Angiotensin-converting enzyme	146	K	N	NLPLAKRQQYNALLSNMSRIYSTAKVCLPNK	110.64	2	714.345	0.91762	P12821	D	D	D
Angiotensin-converting enzyme	695	K	N	TETSKILLQKNMQIANHTLKYGTQARKFDVN	121.61	2	588.297	0.36076	P12821	D	D	D	P12821	D	D	D
Angiotensin-converting enzyme	445	K	N	TPEHLHKIGLLDRVTNDTESDINYLLKMALE	101.61	2	814.401	-0.6359	P12821	D	D	D	P12821	D	D	D
Angiotensin-converting enzyme 2	90	K	N	EQSTLAQMYPLQEIQNLTVKLQLQALQQNGS	129.77	2	1169.1	2.4497					Q9BYF1	D		D
Angiotensin-converting enzyme 2	103	K	N	IQNLTVKLQLQALQQNGSSVLSEDKSKRLNT	173.37	3	726.05	-1.2135	Q9BYF1		D	D	Q9BYF1	D	D	D
Angiotensin-converting enzyme 2	546	K	N	QAAKHEGPLHKCDISNSTEAGQKLFNMLRLG	127.56	2	656.782	0.46861	Q9BYF1	D	D	D	Q9BYF1	D	D	D
Anoctamin-6	802	S	N	DFKNKSKGNPYSDLGNHTTCRYRDFRYPPGH	88.73	2	797.844	0.96844	Q4KMQ2	D		D
Anoctamin-6	361	S	N	IMCPQCDRLCPFWKLNITCESSKKLCIFDSF	94.409	2	527.752	-0.91256	Q4KMQ2	D	D
Anoctamin-6	443	U	N	LSVFVIFSVNLRKISNGTDPIQKYVTPQMAT	95.483	2	602.327	1.2397									F1MFY7	D	D	D
Antithrombin-III	128	K	N	LSISTAFAMTKLGACNDTLQQLMEVFKFDTI	228.84	2	943.45	2.0926	P01008	D	D	D	P01008	D	D	D
Antithrombin-III	187	K	N	LVSANRLFGDKSLTFNETYQDISELVYGAKL	112.56	2	1091.03	-1.2044					P01008		D	D
Apolipoprotein B-100	3411	K	N	ATALSLSNKFVEGSHNSTVSLTTKNMEVSVA	227.67	3	537.27	-0.67226	P04114	D	D	D	P04114	D	D	D
Apolipoprotein B-100	1523	K	N	DPNTGRLNGESNLRFNSSYLQGTNQITGRYE	138.73	2	844.91	-0.078232	P04114	D	D	D	P04114	D	D	D
Apolipoprotein B-100	3465	K	N	SKPTVSSSMEFKYDFNSSMLYSTAKGAVDHK	105.14	2	765.339	0.20276	P04114	D	D	D	P04114	D	D	D
Apolipoprotein B	1520	U	N	DPATGQLTGESNLRFNSSYVQGTNQITGRYD	66.022	2	837.902	-0.30854									E1BNR0		D	D
Apolipoprotein B	3938	U	N	VGTHKIEGGMLVYKTNASFAHRDFSAEYEED	101.64	2	453.719	0.76079									E1BNR0	D	D	D
Apolipoprotein B	3683	U	N	VLPVYDKSLWDLLKLNVTTSLNRKQYLRAAT	108.15	2	510.782	-0.12225									E1BNR0	D	D
Apolipoprotein C-IV	63	K	N	SLVRGRMKELLETVVNRTRDGWQWFWSLDTM	109.48	2	538.298	-1.3381					P55056		D	D
Apolipoprotein C-IV	63	S	N	SLVPGKVKEWVEPLVNRTREKWKWFWGPTAF	156.14	2	686.379	-0.05133									Q3SYR5	D	D	D	Q3SYR5	D	D
Apolipoprotein D	98	K	N	ADGTVNQIEGEATPVNLTEPAKLEVKFSWFM	249.12	2	1363.7	0.10309	P05090	D	D	D	P05090	D	D	D
Apolipoprotein D	65	K	N	EKIPTTFENGRCIQANYSLMENGKIKVLNQE	188.29	2	775.336	0.78118	P05090	D	D	D	P05090	D	D	D
Apolipoprotein D	71	U	N	FENGRCIQANYSLMENGKIKVLNQELRADGT	129.71	2	775.336	0.78118	P05090	D		D	P05090	D	D	D
Apolipoprotein D	98	S	N	ADGTVNQIEGEATPENITEPAKLAVKFFWFM	222.39	2	1144.04	-1.2526									Q32KY0		D	D
Apolipoprotein D	65	S	N	EKIPVSFEKGSCIQANYSLKENGNVEVINKE	85.924	2	622.297	0.93014									Q32KY0	D	D	D	Q32KY0	D	D	D
Apolipoprotein M	135	K	N	KTELFSSSCPGGIMLNETGQGYQRFLLYNRS	163.85	2	1268.07	0.42872	O95445	D		D	O95445	D	D	D
Apoptosis-inducing factor 2	248	U	N	EVATNLVILCTGIKINSSAYRKAFESRLASS	122.79	2	407.203	-0.91087	Q9BRQ8	D	D	D	Q9BRQ8		D	D
Aspartyl/asparaginyl beta-hydroxylase	93	U	N	VDYEEVLAKAKDFRYNLSEVLQGKLGIYDAD	137.98	2	577.303	-0.26075	E5RG56	D	D	D	E5RG56	D	D	D
Aspartyl/asparaginyl beta-hydroxylase	452	K	N	RGSLLTLQRLVQLFPNDTSLKNDLGVGYLLI	116.01	2	689.379	-1.0217	Q12797	D	D	D	Q12797	D	D	D
Aspartylglucosaminidase	53	U	N	KFAESMGFINEDLSTNVSQALHSDWRARNCQ	166.06	3	953.104	0.78298									Q1RMN0		D	D
ATP-binding cassette sub-family G member 2	67	U	N	LLCRKTIEKEILANINGVMKPGLNAILGPTG	105.16	3	818.449	-0.85537													Q4GZT4	D	D
ATP-binding cassette sub-family G member 2	17	U	N	SSNSYEVSIPMSKKLNGIPETTSKDLQTLTE	63.091	2	595.829	-0.25486													Q4GZT4	D		D
Atrial natriuretic peptide-converting enzyme	376	S	N	VCDGDHDCVDKSDEVNCSCHSQGLVECRNGQ	123.03	3	680.608	0.43241					Q9Y5Q5	D	D
Atrial natriuretic peptide-converting enzyme	245	S	N	VNYSWPDFLRCSQFRNQTESSNVSRICFSPQ	123.79	2	562.757	-1.0614					Q9Y5Q5	D	D
Attractin	1073;1059	K;U	N	IHCPACQCNGHSKCINQSICEKCENLTTGKH	95.608	2	577.757	0.07832	O75882	D	D	D	O75882	D	D	D
Attractin	416;403	K;U	N	KDKIYMYGGKIDSTGNVTNELRVFHIHNESW;QDKIYMYGGKIDSTGNVTNELRVFHIHNESW	135.6	2	661.328	-0.10685	O75882		D		O75882	D	D	D	Q8MJ16	D	D	D
Attractin	300	K	N	PHCTDNCGFPHRGICNSSDVRGCSCFSDWQG;PHCVNNCGFPHRGICNSSDVRGCSCFSEWQG	85.731	2	505.726	0.18313	O75882	D	D	D	O75882		D	D
Attractin	914;900	S;U	N	PSTRGLKAATCINPLNGSVCERPANHSAKQC	137.09	4	594.032	-0.43521	O75882	D	D		O75882	D	D	D	Q8MJ16	D	D	D	Q8MJ16	D	D	D
Attractin	923;909	S;U	N	TCINPLNGSVCERPANHSAKQCRTPCALRTA	137.09	3	791.707	0.4566	O75882	D	D		O75882	D	D	D	Q8MJ16	D	D	D	Q8MJ16	D	D	D
Attractin	1198	K	N	VATPDEQNRDLDMFINASKNFNLNITWAASF	90.685	2	578.776	0.4909	O75882		D	D
Attractin	264	K	N	MCPNNCSGRGECKISNSSDTVECECSENWKG	62.278	2	1024.41	1.4383	O75882		D	D
Azurocidin	140	K	N	ANLTSSVTILPLPLQNATVEAGTRCQVAGWG	158.2	2	1301.19	1.6153	P20160	D	D	D
Azurocidin	126	K	N	QNLNDLMLLQLDREANLTSSVTILPLPLQNA	158.2	2	1301.19	1.6153	P20160	D	D	D
Azurocidin	171	K	N	SQRSGGRLSRFPRFVNVTVTPEDQCRPNNVC	172.61	2	1390.17	-0.29522	P20160	D	D	D	P20160	D	D	D
Azurocidin	154	U	N	ANLTSSVALVPLPEQNATVEAGTGCQVAGWG	172.03	3	1163.57	-0.23227									G3N2H4	D	D
Azurocidin	140	U	N	NLNDVLLLQQLDRQANLTSSVALVPLPEQNA	172.03	3	1163.57	-0.23227									G3N2H4	D	D
Azurocidin	185	U	N	TRRRRGRLSRVPRVLNVTVTPANQCRPNNVC	212.01	2	1343.69	0.67896									G3N2H4	D	D	D	G3N2H4	D		D
Basement membrane-specific heparan sulfate proteoglycan core protein	1755	K	N	DAGVYICTCRNLHQSNTSRAELLVTEAPSKP	92.428	2	530.257	-0.012882	P98160	D	D	D	P98160	D	D	D
Basement membrane-specific heparan sulfate proteoglycan core protein	3780	K	N	SLTQGSLIVGDLAPVNGTSQGKFQGLDLNEE	139.28	2	1073.07	0.28808	P98160	D	D	D
Basigin	160	K	N	TVEDLGSKILLTCSLNDSATEVTGHRWLKGG	235.26	3	663.998	0.68839	P35613	D	D	D	P35613	D	D	D
Basigin	268	K	N	WAWYKITDSEDKALMNGSESRFFVSSSQGRS	206.8	2	878.401	-4.2104	P35613	D	D	D	P35613	D	D	D
Basigin	44	U	N	NIDNDGSKTRLTCALNHSATEIVGHRWVKGG	278.39	3	594.633	-1.5602									Q3ZBX0	D	D	D	Q3ZBX0	D	D	D
Basigin	152	U	N	WLWYKESESGDQVITNSTQSKFFVVSSESRT	220.27	2	856.889	0.15569									Q3ZBX0	D	D	D
BDNF/NT-3 growth factors receptor	254	K	N	HMNETSHTQGSLRITNISSDDSGKQISCVAE	117.09	2	570.269	-0.48252	Q16620	D	D	D	Q16620		D	D
BDNF/NT-3 growth factors receptor	241	K	N	PNMYWDVGNLVSKHMNETSHTQGSLRITNIS	210.44	3	506.228	-1.145	Q16620	D	D	D	Q16620	D	D	D
BDNF/NT-3 growth factors receptor	121	K	N	VAHKAFLKNSNLQHINFTRNKLTSLSRKHFR	226.53	2	673.839	-0.5448	Q16620	D	D	D	Q16620	D	D	D
Beta-1,3-galactosyl-O-glycosyl-glycoprotein beta-1,6-N-acetylglucosaminyltransferase 3	69	U	N	NILYNFLKLPAKRSINCSGVTRGDQEAVLQA	108.67	2	498.737	0.35279	O95395	D	D	D	O95395	D	D	D
Beta-1,3-N-acetylglucosaminyltransferase lunatic fringe	167	S	N	EDEALARHTGNVVITNCSAAHSRQALSCKMA	269.51	3	576.277	0.50694	Q8NES3	D	D	D	Q8NES3	D	D	D
Beta-1,3-N-acetylglucosaminyltransferase lunatic fringe	168	S	N	EDEALARRTGHVVNTNCSAAHSRQALSCKMA	162.81	3	538.583	0.54394									Q2KJ92	D	D	D
Beta-1,3-N-acetylglucosaminyltransferase radical fringe	113	S	N	DPELELQGGDRVINTNCSAVRTRQALCCKMS	97.456	2	568.784	-0.59628	Q9Y644	D		D
Beta-1,4-galactosyltransferase 1	90	K	N	GELRLRGVAPPPPLQNSSKPRSRAPSNLDAY	128.96	2	774.425	0.76893									P08037	D	D	D	P08037	D	D	D
Beta-1,4-N-acetylgalactosaminyltransferase	101	U	N	RLGPKDPGSARGGSGNSSYLKWNKPVPWLSE	88.681	2	486.73	0.13952									F1N0M7	D	D	D
Beta-2-glycoprotein 1	183	K	N	DTAVFECLPQHAMFGNDTITCTTHGNWTKLP	134.04	4	840.37	0.20485	P02749	D	D	D	P02749	D	D	D
Beta-2-glycoprotein 1	193	K	N	HAMFGNDTITCTTHGNWTKLPECREVKCPFP	134.04	4	840.37	0.20485	P02749	D	D	D	P02749	D	D	D
Beta-2-glycoprotein 1	162	K	N	IPTFATLRVYKPSAGNNSLYRDTAVFECLPQ	173.19	2	737.869	1.2366	P02749	D	D	D	P02749	D	D	D
Beta-2-glycoprotein 1	253	K	N	YSLDGPEEIECTKLGNWSAMPSCKASCKVPV	142.71	2	635.278	-1.0185	P02749	D	D	D	P02749	D	D	D
Beta-2-glycoprotein 1	193	K	N	HAMFGNDTVTCTEHGNWTQLPECREVRCPFP	153.94	3	1125.48	-1.7342									P17690		D	D
Beta-2-glycoprotein 1	162	K	N	IPKFASLSVYKPLAGNNSFYGSKAVFKCLPH	180.86	2	1078.54	0.53214									P17690	D	D	D	P17690	D	D
Beta-2-glycoprotein 1	92	K	N	LKCMPRVCPFAGILENGTVRYTTFEYPNTIS	126.32	2	768.392	0.8392									P17690	D	D	D	P17690		D	D
Beta-2-glycoprotein 1	183	K	N	SKAVFKCLPHHAMFGNDTVTCTEHGNWTQLP	153.94	3	1125.48	-1.7342									P17690		D	D
Beta-2-glycoprotein 1	253	K	N	YSLDGPEEVECSKFGNWSAQPSCKASCKLSI	125.54	2	642.782	0.28557									P17690	D	D	D	P17690	D	D	D
Beta-galactosidase	464	K	N	GIPQGVLERNNVITLNITGKAGATLDLLVEN	72.958	2	595.337	-0.26392	P16278	D	D
Beta-galactosidase-1-like protein	486	U;U	N	LDILVENMGRLSFGSNSSDFKGLLKPPILGQ	110.66	2	596.274	0.51831	Q6UWU2	D	D	D	Q6UWU2	D	D	D
Beta-glucuronidase	272	K	N	KLEVRLLDAENKVVANGTGTQGQLKVPGVSL	114.72	2	638.343	0.00092991	P08236	D	D	D	P08236	D	D	D
Beta-hexosaminidase subunit alpha	157	S	N	FSQLIWRSPEGTFYVNKTDIEDFPRFPHRGL	105.86	2	572.774	0.49316									Q0V8R6	D	D	D
Biglycan	312	K	N	LPDLKLLQVVYLHTNNITKVGVNDFCPVGFG	222.29	3	554.646	-0.41744									P21809	D	D	D
Biglycan	271	K	N	LYRLGLGHNQIRMIENGSLSFLPTLRELHLD	151.56	2	790.916	-0.57138									P21809	D	D
Bile salt-activated lipase	207	U	N	AWVKRNIAAFGGDPNNITLFGESAGGASVSL	233.49	3	1139.56	5.388	P19835	D	D	D	P19835	D	D	D
Biotinidase	150;132	K;S	N	PQVVRWNPCLEPHRFNDTEVLQRLSCMAIRG;PRSVRWNPCLEPHRFNDTEVLQRLSCMAMKG	126.82	2	562.777	0.67393	P43251		D	D					A6QQ07	D	D	D
Biotinidase	101	U	N	GAQIIVFPEDGIHGFNFTRTSIYPFLDFMPS	134.37	3	707.693	0.69734									A6QQ07	D	D
Biotinidase	331	U	N	IAEVARNPPGLISAGNATGKTDPFHRKFLQL	78.069	2	650.343	0.62714									A6QQ07	D	D	D
BoLa class II histocompatibility antigen, DQB*0101 beta chain	51	S	N	PEDFVYQFKGLCYFTNGTERVRGVTRHIYNR	71.524	2	660.792	0.3097									Q9TVC8	D	D	D
Bone morphogenetic protein 1	363	S	N	CVWRISVTPGEKIILNFTSLDLYRSRLCWYD	203.83	2	735.908	0.017733	P13497	D	D	D	P13497	D	D	D
Bone morphogenetic protein 1	599	S	N	KRRCEAACGGFLTKLNGSITSPGWPKEYPPN	137.16	2	630.329	0.097385	P13497	D	D	D	P13497	D	D	D
Bone morphogenetic protein 3	119	S	N	AGAAGMLENKELHIFNLTSLTKSENILSATL	215.51	3	473.597	-0.47243									P22444	D	D	D
Bone morphogenetic protein 3	177	S	N	HIQIDLSAWILKSSGNQSQLLGHLSVDGGKP	85.231	4	545.029	0.66675									P22444	D	D	D
BPI fold-containing family B member 1	215	S	N	PVLKAGFEDMRGELLNLTKVPMSLNSEHLKL	99.802	2	445.758	0.88945									Q8SPF8	D	D	D	Q8SPF8		D	D
Brain-specific serine protease 4	70;70	K;U	N	DSTDSEWPWIVSIQKNGTHHCAGSLLTSRWV	105.31	3	505.24	1.6395					Q9GZN4	D	D	D
Butyrophilin subfamily 1 member A1	55	K	N	AVVGEDAELPCRLSPNASAEHLELRWFRKKV	226.33	2	720.372	1.2029	Q13410	D	D	D	Q13410	D	D	D
Butyrophilin subfamily 1 member A1	215	K	N	FTVAASVIIRDTSAKNVSCYIQNLLLGQEKK	363.2	2	892.947	-2.0634	Q13410	D	D	D	Q13410	D	D	D
Butyrophilin subfamily 1 member A1	55	K	N	AVVGEDAELPCRLSPNVSAKGMELRWFREKV	108.17	2	702.874	-0.80339									P18892	D	D	D	P18892	D	D	D
Butyrophilin subfamily 1 member A1	215	K	N	FTVRASVIIRDSSMKNVSCCIRNLLLGQEKE	176.87	3	487.212	-0.88755									P18892	D	D	D	P18892	D	D	D
Butyrophilin subfamily 2 member A1	120	K	N	RGSVALVIHNITAQENGTYRCYFQEGRSYDE	225.11	3	683.684	0.50748	Q7KYR7		D	D	Q7KYR7	D	D	D
Butyrophilin subfamily 2 member A1	114	K	N	VSKDISRGSVALVIHNITAQENGTYRCYFQE	225.11	3	683.684	0.50748	Q7KYR7		D	D	Q7KYR7	D	D	D
Butyrophilin subfamily 3 member A3	115	K	N	LRDGITAGKAALRIHNVTASDSGKYLCYFQH	140.91	2	566.28	0.67533	O00478	D	D	D	O00478	D	D	D
C4b-binding protein alpha chain	506	K	N	NGRLSVDKDQYVEPENVTIQCDSGYGVVGPQ	60.876	4	995.209	0.51625	P04003	D	D	D
C4b-binding protein alpha chain	221	K	N	RFSLLGHASISCTVENETIGVWRPSPPTCEK	149.66	4	844.661	0.75693	P04003	D	D
C4b-binding protein alpha chain	528	K	N	SGYGVVGPQSITCSGNRTWYPEVPKCEWETP	60.876	4	995.209	0.51625	P04003	D	D	D
C4b-binding protein beta chain	64	K	N	CIKGYHLVGKKTLFCNASKEWDNTTTECRLG	119.34	2	472.226	0.18892	P20851	D	D		P20851	D	D	D
C4b-binding protein beta chain	98	K	N	DPVLVNGEFSSSGPVNVSDKITFMCNDHYIL	121.35	2	1309.11	3.2523	P20851	D	D	D	P20851	D
C4b-binding protein beta chain	71	K	N	VGKKTLFCNASKEWDNTTTECRLGHCPDPVL	107.08	2	657.761	-0.31341	P20851	D	D	D	P20851	D	D	D
Calcium-activated chloride channel regulator 4	588	S	N	ANPETLTITVTSRAANSSVPPITVNAKMNKD	73.91	2	686.372	0.54615	Q14CN2	D	D	D	Q14CN2	D	D	D
Calcium-activated chloride channel regulator 4	852	S	N	NATHIFIAIKSIDKSNLTSKVSNIAQVTLFI	150.46	3	365.864	0.13606	Q14CN2	D	D	D	Q14CN2	D	D	D
Calreticulin	179	U	N	KDDEFTHLYTLIVRPNNTYEVKIDNSQVESG	207.64	3	953.469	-0.92721									P52193	D	D	D	P52193	D	D
Calumenin	131	K	N	HDLNEDGLVSWEEYKNATYGYVLDDPDPDDG	135.09	2	1141.49	-0.57761	O43852	D	D	D	O43852	D	D	D
Carbohydrate sulfotransferase 12	280	S	N	EFYRKFAVPMLRLYANHTSLPASAREAFRAG	163.99	3	468.577	0.045661	Q9NRB3	D	D	D	Q9NRB3	D	D	D
Carbohydrate sulfotransferase 12	134	S	N	RQQAERRSVLRGFCANSSLAFPTKERAFDDI	85.536	2	701.832	-0.37723	Q9NRB3	D	D	D	Q9NRB3		D	D
Carbonic anhydrase 4	265	S	N	LAFSQKLFYDDQQKVNMTDNVRPVQSLGQRQ	82.452	2	476.226	-0.59487									Q95323	D	D	D	Q95323	D	D
Carbonic anhydrase 6	67	S	N	LQRTKVRYNPSLKGLNMTGYETQAGEFPMVN	193.11	3	1161.88	0.51514	P23280	D	D	D	P23280	D	D	D
Carbonic anhydrase 6	256	S	N	RTQVWKLENSLLDHRNKTIHNDYRRTQPLNH	141.08	2	582.288	-0.12892	P23280	D	D	D	P23280	D	D	D
Carbonic anhydrase-related protein 11	118	K	N	TGRHVSFLPAPRPVVNVSGGPLLYSHRLSEL	135.14	3	533.291	-0.198	O75493	D	D	D	O75493		D	D
Carboxylesterase 3	105	K	N	ASTAPPMCLQDVESMNSSRFVLNGKQQIFSV	98.175	2	1099.97	1.4298					Q6UWW8	D	D
Carboxypeptidase B2	108	K	N	VLVENVEDLIRQQTSNDTISPRASSSYYEQY	73.632	2	625.299	0.76576									Q2KIG3	D	D	D
Carboxypeptidase M	384	S	N	HDPHITKVIIPEKSQNFSALKKDILLPFQGQ	133.98	2	513.279	0.66833	P14384	D	D	D
Carboxypeptidase M	38	K	N	HRQEGMEAFLKTVAQNYSSVTHLHSIGKSVK	198.51	2	922.973	0.96999	P14384	D	D	D	P14384	D	D
Carboxypeptidase M	164	K	N	QYDLNRNFPDAFEYNNVSRQPETVAVMKWLK	69.258	2	788.352	-0.64744	P14384	D	D
Carboxypeptidase M	38	U	N	HHQPEMEAFLKNVAQNYSSITHLHSIGKSVQ	113.29	3	624.655	0.63469									A7MBD9	D	D	D
Carboxypeptidase Z	57	U	N	TCVDLQLRTCSDAAYNHTTFPNLLQHRSWEV	269.33	2	1125.02	1.2217	Q66K79	D	D	D	Q66K79	D	D	D
Carcinoembryonic antigen-related cell adhesion molecule 1	363	K	N	CSTNDTGISIRWFFKNQSLPSSERMKLSQGN	217.91	2	814.901	-1.1529	P13688	D	D	D	P13688	D	D	D
Carcinoembryonic antigen-related cell adhesion molecule 1	345	S	N	IKASKTTVTGDKDSVNLTCSTNDTGISIRWF	189.33	3	854.405	0.74956	P13688	D	D	D	P13688	D	D	D
Carcinoembryonic antigen-related cell adhesion molecule 1	195	U	N	INNQSLPVSPRLQLSNGNRTLTLLSVTRNDT	113.5	2	454.234	0.12597	P13688	D	D	D	P13688		D	D
Carcinoembryonic antigen-related cell adhesion molecule 1	378	K	N	NQSLPSSERMKLSQGNTTLSINPVKREDAGT	235.22	2	815.954	0.24223	P13688	D	D	D	P13688	D	D	D
Carcinoembryonic antigen-related cell adhesion molecule 1	197	S	N	NQSLPVSPRLQLSNGNRTLTLLSVTRNDTGP	113.5	2	454.234	0.12597	P13688	D	D	D	P13688	D	D	D
Carcinoembryonic antigen-related cell adhesion molecule 1	152	K	N	QFHVYPELPKPSISSNNSNPVEDKDAVAFTC	125.5	2	745.846	0.58984	P13688	D	D	D
Carcinoembryonic antigen-related cell adhesion molecule 1	351	S	N	TVTGDKDSVNLTCSTNDTGISIRWFFKNQSL	152.35	3	854.405	0.74956	P13688	D	D	D	P13688	D	D	D
Carcinoembryonic antigen-related cell adhesion molecule 1	287	U	N	GRSLLLAQRMTLSSDNSTLTIDPVSRQDAGD	197.49	2	928.446	1.5576									Q6VAN8	D	D	D	Q6VAN8	D	D	D
Carcinoembryonic antigen-related cell adhesion molecule 1	205	U	N	LSEDKRTLTVFNVTRNDTGPYVCEAWNPVSV	114.34	2	1027.46	0.98751									Q6VAN8	D	D	D
Carcinoembryonic antigen-related cell adhesion molecule 1	108	U	N	SGRETLYPNGTLLIQNVTQKDTGSYTLLVTK	123.03	2	969.514	-1.0217													Q6VAN8	D	D	D
Carcinoembryonic antigen-related cell adhesion molecule 1	201	U	N	TRLELSEDKRTLTVFNVTRNDTGPYVCEAWN	90.108	2	527.295	0.090038									Q6VAN8	D	D	D	Q6VAN8		D	D
Carcinoembryonic antigen-related cell adhesion molecule 1	101	U	N	TTKGPAHSGRETLYPNGTLLIQNVTQKDTGS	123.03	2	969.514	-1.0217													Q6VAN8	D	D	D
Carcinoembryonic antigen-related cell adhesion molecule 1 isoform 3L	87	U	N	RVDNTQLIASYRVDTNATTKGPAHSGRETLY	99.442	2	426.713	0.26438									Q6RWT6	D	D	D	Q6RWT6		D	D
Carcinoembryonic antigen-related cell adhesion molecule 1 isoform 3L	104	U	N	TTKGPAHSGRETLYPNGTLLIQSVTQKDTGS	155.92	3	636.679	0.18297									Q6RWT6	D	D	D	Q6RWT6			D
Carcinoembryonic antigen-related cell adhesion molecule 6	224	K	N	DAGSYECEIQNPASANRSDPVTLNVLYGPDG	183.74	2	999.921	0.31891	P40199	D	D	D
Carcinoembryonic antigen-related cell adhesion molecule 8	104	U	N	ITPGPAYSNRETIYPNASLLMRNVTRNDTGS	129.84	2	705.863	-0.037289	P31997	D	D	D
Carcinoembryonic antigen-related cell adhesion molecule 8	152	U	N	QFSVHPETPKPSISSNNSNPVEDKDAVAFTC	125.5	2	745.846	0.58984	P31997	D	D	D	P31997		D
Carcinoembryonic antigen-related cell adhesion molecule 8	288	U	N	VNGTFQQYTQKLFIPNITTKNSGSYACHTTN	89.886	2	525.31	-0.42798	P31997	D	D	D
Cartilage intermediate layer protein	129;105	S;U	N	REGFWCLNREQRPGQNCSNYTVRFLCPPGSL	142.1	3	571.262	0.86291	O75339	D	D	D	O75339	D	D	D					E1BIR5		D
Cathelicidin-1	101	U	N	SRTTQQPPEQCDFKENGLLKRCEGTVTLDQV	82.349	3	712.677	0.48864									P22226		D	D	P22226		D	D
Cathepsin D	263	K	N	GGTDSKYYKGSLSYLNVTRKAYWQVHLDQVE	143.96	2	556.795	0.42898	P07339	D	D	D	P07339	D	D	D
Cathepsin D	241	S	N	GGTDSKYYRGSLMFHNVTRQAYWQIHMDQLD	73.848	2	582.789	-0.68393									P80209	D	D	D
Cathepsin F	378	K	N	MQSCNFSAEKAKVYINDSVELSQNEQKLAAW	124.62	2	884.928	0.96111					Q9UBX1	D	D	D
Cathepsin F	195	S	N	PVKMASIFKNFVITYNRTYESKEEARWRLSV	147.04	2	515.266	-0.21649	Q9UBX1	D	D	D	Q9UBX1	D	D	D
Cathepsin L1	221	K	N	ATEESCKYNPKYSVANDTGFVDIPKQEKALM	97.797	2	764.874	0.80448	P07711	D	D	D
Cation-dependent mannose-6-phosphate receptor	83	K	N	SDTYIYIFRVCREAGNHTSGAGLVQINKSNG	215.48	2	799.905	0.43709	P20645	D	D	D	P20645	D	D	D
Cation-dependent mannose-6-phosphate receptor	85	S	N	PDMYSYVFRVCREAGNHSSGAGLVQINKSNG	248.97	2	792.897	0.026537									P11456	D	D	D	P11456	D	D
Cation-independent mannose-6-phosphate receptor	112	K	N	GDSVLRSATRSLLEFNTTVSCDQQGTNHRVQ	132.79	3	737.339	1.5205	P11717	D	D	D	P11717		D
Cation-independent mannose-6-phosphate receptor	1312	S	N	LLTQKLTYENGLLKMNFTGGDTCHKVYQRST	140.39	3	424.174	-0.33432	P11717	D	D	D	P11717	D	D	D
Cation-independent mannose-6-phosphate receptor	581	K	N	YSDGDDCGHGKKIKTNITLVCKPGDLESAPV	163.45	2	1043.56	0.09632	P11717	D	D	D	P11717	D	D	D
Cation-independent mannose-6-phosphate receptor	120	K	N	GDSLLKTASRSLLEFNTTVNCKQQNHKIQSS	119.74	2	714.85	-0.5227									P08169		D	D
Cation-independent mannose-6-phosphate receptor	2220	S	N	RKANDQHFSRKVGTSNQTRYYVQDGDLDVVF	98.033	2	433.217	0.1096									P08169	D	D	D	P08169		D	D
Cation-transporting ATPase	1012	U	N	QPWYSLGIHSACTVQNDTISKLTVSPTAPVK	84.762	3	803.386	0.45818									F1N272	D		D	F1N272		D	D
C-C motif chemokine 28	78	S	N	VILHVKRRRICVSPHNHTVKQWMKVQAAKKN	96.113	2	647.827	0.98917	Q9NRJ3		D	D
CD109 antigen	247	K	N	TLQTPLYCSMNSKHLNGTITAKYTYGKPVKG	71.349	2	479.266	-0.85172	Q6YHK3		D	D	Q6YHK3	D		D
CD109 antigen	118	U	N	ELRVTGRAQDEILFSNSTRLSFETKRMTVFI	91.62	2	692.335	-3.9925													F1MPE1	D	D
CD151 antigen	159	S	N	SAVDQLQQEFHCCGSNNSQDWRDSEWIRSQE	202.85	3	1263.54	-0.10326	P48509	D	D	D	P48509	D	D	D
CD151 antigen	159	S	N	SAVDKLQQEFHCCGSNNSRDWQDSEWIHSGE	115.82	2	870.359	-1.4362									Q3ZBH3	D	D	D	Q3ZBH3		D	D
CD166 antigen	167	S	N	KKLGECISKDSYPDGNITWYRNGKVLQALEG	73.466	2	745.328	0.41069									Q9BH13	D	D	D
CD177 molecule	34	U	N	ARALNCYSGGVETIRNVSEQPFRWTTSQVNC	133.12	2	490.24	0.34205									E1BF48	D	D	D	E1BF48	D	D	D
CD177 molecule	192	U	N	LKVQGCISQAGCNLLNGTQEVGPISLWETCI	171.02	3	1144.89	0.1287									E1BF48	D	D	D
CD276 antigen	215;212	S;U	N	GLFDVHSILRVVLGANGTYSCLVRNPVLQQD	129.54	2	756.392	-0.24285	Q5ZPR3	D	D	D	Q5ZPR3	D	D	D					Q0KIZ6		D	D
CD276 antigen	91	U	N	VHSFAEGQDQGSAYANRTALFPDLLAQGNAS	153.75	2	1040.98	0.19572	Q5ZPR3	D	D	D	Q5ZPR3	D	D	D
CD276 antigen	104	S	N	YANRTALFPDLLAQGNASLRLQRVRVADEGS	105.31	2	845.456	0.25861	Q5ZPR3	D	D	D	Q5ZPR3	D	D	D
CD36	2	U	N	______________YNNTADGVYKVFNGKDN	112.36	2	574.261	0.25962	Q9BZN1	D	D	D	Q9BZN1	D	D
CD44 antigen	57	S	N	YSISKTEAADLCKAFNSTLPTMAQMEAARNI	114.29	2	879.408	0.36762									Q29423	D	D	D
CD48 antigen	162	S	N	NCYLKLSCVIPGESVNYTWYGDKRPFPKELQ	61.87	2	1045.98	0.76362	P09326	D	D
CD48 antigen	104	K	N	PQSGALYISKVQKEDNSTYIMRVLKKTGNEQ	102.87	2	743.858	-1.306	P09326	D	D	D
CD48 antigen	38	U	N	AISIQGHSKYAIPGDNVTLHISNLPKNHKSL	111.22	3	619	0.052209									Q2KHZ6	D	D	D	Q2KHZ6	D	D	D
CD48 antigen	185	U	N	KQLQGSVLQVVHTPENYSKSYTCQVSNPVSS	148.56	3	677.353	0.043709									Q2KHZ6	D	D	D	Q2KHZ6	D	D	D
CD58 protein	104	U	N	FQSFKDRVYLDIGSGNLTITRLTKSDEGLYE	112.02	2	762.911	0.25413									A7YW37	D	D	D
CD59 glycoprotein	43	K	N	CYNCPNPTADCKTAVNCSSDFDACLITKAGL	178.03	2	902.903	-0.81036	P13987	D	D	D	P13987	D	D	D
CD5L protein	97	U	N	LADEKQKIFIQDVNCNGTEDELIECDRVEDV	336.06	2	1223.53	5.5972									A6QNW7	D	D	D	A6QNW7		D	D
CD5L protein	267	U	N	VKHQKQWGTVCKAGWNLSAAKVVCRQLGCGK	101.11	2	460.74	0.76568									A6QNW7	D	D	D	A6QNW7		D	D
CD63 antigen	129	U	N	EFNNNFRQQMENYPKNNHTASILDRMQADFK	154.24	2	572.286	0.12102	P08962	D	D	D	P08962	D	D	D
CD63 antigen	130	K	N	FNNNFRQQMENYPKNNHTASILDRMQADFKC	181.68	2	572.286	-0.51405	P08962	D	D	D	P08962	D	D	D
CD63 antigen	150	S	N	ILDRMQADFKCCGAANYTDWEKIPSMSKNRV	146.5	3	707.637	0.41134	P08962	D	D		P08962	D	D	D
CD63 antigen	172	S	N	IPSMSKNRVPDSCCINVTVGCGINFNEKAIH	99.11	3	852.722	-0.98998	P08962	D		D
CD63 antigen	130	S	N	FNKDFRQQMKNYPKDNQTASILDKMQKDFEC	182.37	2	805.401	-0.28149									Q9XSK2	D	D	D	Q9XSK2	D	D	D
CD63 antigen	150	S	N	ILDKMQKDFECCGAANYTDWEKILAVTNKVP	216.27	2	934.853	-0.54122									Q9XSK2	D	D	D
CD63 antigen	171	S	N	KILAVTNKVPDSCCVNITHNCGINFVVKDIH	202.07	3	779.362	0.40369									Q9XSK2	D	D	D	Q9XSK2	D	D
CD74 molecule, major histocompatibility complex, class II invariant chain	118	U	N	PMAGPEPMKNATKYGNMTQDHVMHLLLKADP	134.21	3	601.632	-0.27176									Q29630	D	D	D
CD82 antigen/Tetraspanin	198	K	N	DNSLSVRKGFCEAPGNRTQSGNHPEDWPVYQ	130.79	2	569.763	-0.24232	P27701	D	D	D	P27701	D	D	D
CD82 antigen/Tetraspanin	129	K	N	KQEMGGIVTELIRDYNSSREDSLQDAWDYVQ	143.95	3	874.061	-1.1437	P27701			D	P27701		D	D
CD82 antigen/Tetraspanin	199	U	N	ALMMPQKGFCEVPFGNKTQSGNNPKDWPVYQ	101.11	2	579.263	0.34404									A5D7E6	D	D	D	A5D7E6
CD82 antigen/Tetraspanin	127	U	N	QLKQEMGSIVTKLIHNYTDGSGDNLQEAWDY	237.5	3	956.45	-0.1456													A5D7E6		D	D
CD9 antigen	151	U	N	DEPQRETLKAIHYALNCCGLAGGVEQFISDI	215.48	2	1398.66	0.35172	P21926	D	D	D	P21926	D
CD97 antigen	108	S	N	CSPGYEPVSGAKTFKNESENTCQDVDECQQN	153.06	3	868.027	-0.18134	P48960	D	D	D
CD97 antigen	453	K	N	QLRRLSAVNSIFLSHNNTKELNSPILFAFSH	173.36	3	549.958	0.30407	P48960	D	D	D	P48960	D	D	D
CD97 antigen	371	K	N	SNTELTLMIQERGDKNVTMGQSSARMKLNWA	182.72	3	451.882	-0.038672	P48960	D	D	D	P48960	D
CD97 antigen	38	S	N	SRGCARWCPQNSSCVNATACRCNPGFSSFSE	135.37	2	907.369	-0.9344	P48960	D	D	D	P48960	D	D	D
CD97 antigen	285	S	N	DNTELSLVVQEQGKGNVTVGQSHARMLLDWA	127.87	2	564.786	-0.47968									Q8SQA4	D	D	D
CD97 antigen	403	S	N	RQELICAFWKKDSNGNGSWATTGCWKMGRGN	89.541	2	822.336	0.36116									Q8SQA4	D	D	D
CD97 antigen	44	S	N	SKACALPCPPNSSCVNGTACRCAPGFISFSG	81.317	2	1047.94	-0.19945									Q8SQA4		D	D
CD97 antigen	372	S	N	SSVFLSNTNTEKLDSNVSFAFALHEQPELKP	129.15	3	767.73	-0.025451									Q8SQA4		D	D
cDNA FLJ51641, highly similar to Nicastrin	6	U	N	__________MLKPINTTGTLKPDDRVVVAA	128.9	3	477.584	-0.13615	B4DJN0	D	D	D	B4DJN0		D	D
cDNA FLJ56151, highly similar to Platelet glycoprotein 4	3	U	N	_____________MMNSSNIQVKQRGPYTYR	127.76	2	512.255	0.39082	B7Z6C3	D	D	D	B7Z6C3	D	D	D
cDNA FLJ56954, highly similar to Inter-alpha-trypsin inhibitor heavy chain H1	588	U	N	ELLAKRMKVDREVRANLSSQALRMSLDYGFV	142.92	2	481.761	0.31246	B7Z539	D	D	D	B7Z539	D	D	D
Cell adhesion molecule 1	104	U	N	FRDFRPLKDSRFQLLNFSSSELKVSLTNVSI	129.74	2	708.369	0.74569									Q2TBL2	D	D	D
Cell adhesion molecule 1	116	U	N	QLLNFSSSELKVSLTNVSISDEGRYFCQLYT	145	2	690.349	0.070463									Q2TBL2	D	D	D
Cell cycle control protein 50A	294	K	N	KSDLHPTLPAGRYSLNVTYNYPVHYFDGRKR	191.41	2	1055.99	-0.60735	Q9NV96	D	D	D	Q9NV96	D	D	D
Cell cycle control protein 50A	294	S	N	KNDLHPTLPAGRYYLNITYNYPVHSFDGRKR	209.57	2	1063	0.53987									Q17QL5	D	D	D
Cell cycle control protein 50B	273	U	N	ALPTFRKLYARIRQGNYSAGLPRGAYRVNIT	66.056	2	533.264	0.13705					Q3MIR4	D	D	D
Cell cycle control protein 50B	286;304	S;U	N	QGNYSAGLPRGAYRVNITYNYPVRAFGGHKL	163.77	2	621.324	-0.28804	Q3MIR4	D	D	D	Q3MIR4	D	D	D	F1MPT8	D	D
Cell cycle control protein 50B	145	U	N	DAQLSGLPSALRHPVNECAPYQRSAAGLPIA	100.72	3	458.543	-0.22881	Q3MIR4	D	D	D	Q3MIR4	D	D	D
Cell surface glycoprotein MUC18	449	S	N	AFKERKVWVKENMVLNLSCEASGHPRPTISW	105.31	3	606.278	0.20239					P43121	D		D
Cell surface glycoprotein MUC18	56	S	N	GSTALLKCGLSQSQGNLSHVDWFSVHKEKRT	91.637	4	573.021	-0.54074	P43121	D		D	P43121	D	D
Cellular repressor of E1A-stimulated genes 1	160	K	N	PLCVHIMLSGTVTKVNETEMDIAKHSLFIRH	93.096	2	576.771	0.7673					O75629		D	D
Cellular repressor of E1A-stimulated genes 1	217	U	N	DYFGGPKIVTPAEYYNATSQ___________	96.745	2	730.345	-0.31517									Q148D9	D	D		Q148D9		D	D
Ceramide synthase 2	19;19	K;S	N	TLHDYFWWERLWLPVNLTWADLEDRDGRVYA	121.31	2	922.477	-0.1407	Q96G23	D		D	Q96G23	D	D	D	Q3ZBF8	D	D	D	Q3ZBF8		D	D
Ceramide synthase 4	19	U	N	SFNEWFWQDRFWLPPNVTWTELEDRDGRVYP	109.83	2	953.467	0.48159	Q9HA82	D	D	D	Q9HA82	D	D	D
Ceroid-lipofuscinosis neuronal protein 5	255	K	N	NKLAEFGAEFKNIETNYTRIFLYSGEPTYLG	107.69	2	507.243	0.15035	O75503	D	D	D	O75503	D	D	D
Ceruloplasmin	138	K	N	GITYYKEHEGAIYPDNTTDFQRADDKVYPGE	160.48	2	948.418	-2.0584	P00450	D	D		P00450	D	D	D
Ceruloplasmin	397	K	N	IWNYAPSGIDIFTKENLTAPGSDSAVFFEQG	115.46	2	1065.5	0.37544	P00450	D	D	D
Ceruloplasmin	762	K	N	PQREWEKELHHLQEQNVSNAFLDKGEFYIGS	222.3	2	1013	-0.18967	P00450	D	D	D
Ceruloplasmin	138	U	N	GMTYYKEHEGAIYPDNTTDFQKADDKVQPGE	230.16	2	934.415	1.9628									F1N076	D	D	D
Ceruloplasmin	757	U	N	PSRKWEKELHHLQEQNLSNAFLDKEEFYIGS	112.86	4	748.87	0.52974									F1N076		D	D
Choline transporter-like protein 2	417;417	S;S	N	PFTAKTCNPETFPSSNESRQCPNARCQFAFY;PVAGKTCNPETFPSSNESRLCPGAHCQFAFY	168.67	2	814.841	-0.18578	Q8IWA5	D	D	D	Q8IWA5	D	D	D	A5D7H3	D	D	D
Choline transporter-like protein 2	187	K	N	CFPAIHAYKGVLMVGNETTYEDGHGSRKNIT	189.42	3	642.291	0.018576	Q8IWA5	D	D	D	Q8IWA5	D	D	D
Choline transporter-like protein 2	200	K	N	VGNETTYEDGHGSRKNITDLVEGAKKANGVL	156.51	2	531.782	-0.73777	Q8IWA5	D	D	D	Q8IWA5	D	D	D
Choline transporter-like protein 2	397	S	N	AIFLSTSNEAVYKIFNETSCPVAGKTCNPET	72.29	2	663.318	0.068795									A5D7H3	D	D	D	A5D7H3	D	D
Choline transporter-like protein 2	187	S	N	CFPAVHAHKGILMVGNETTYEDGLGSRKNIT	84.829	2	957.954	-2.3021									A5D7H3	D	D		A5D7H3	D	D
Choline transporter-like protein 2	200	S	N	VGNETTYEDGLGSRKNITELVEGAKKASGIL	92.856	2	602.837	1.1067									A5D7H3	D	D	D
Cholinesterase	369	S	N	GTAFLVYGAPGFSKDNNSIITRKEFQEGLKI	84.213	2	468.238	-0.0097994									P32749	D	D	D
Chordin-like protein 2	114	K	N	HTPSGLRAPPKSCQHNGTMYQHGEIFSAHEL	303.8	3	951.418	-2.1852	Q6WN34	D	D	D	Q6WN34	D	D	D
Ciliary neurotrophic factor receptor	60	U	N	PCGTASWDAAVTWRVNGTDLAPDLLNGSQLV	149.47	2	999.541	0.18812									F1MLR4	D	D	D	F1MLR4	D	D	D
Ciliary neurotrophic factor receptor	70	U	N	VTWRVNGTDLAPDLLNGSQLVLRSLELGHGG	149.47	3	667.693	1.5141									F1MLR4	D	D	D	F1MLR4	D	D	D
Cleft lip and palate transmembrane protein 1 homolog	295	K	N	YFNDYWNLQKDYYPINESLASLPLRVSFCPL	116.96	2	877.448	-2.0911	O96005	D	D	D	O96005	D	D	D
Cleft lip and palate transmembrane protein 1-like protein	229	K	N	FIDQLSNRVKDLMVINRSSTELPLTVSYDKI	122.94	3	364.211	-0.030731	Q96KA5	D	D	D	Q96KA5	D	D	D
Clusterin	291;283	K;S	N	REGDDDRTVCREIRHNSTGCLRMKDQCDKCR	205.12	2	474.216	0.70896	P10909	D	D	D	P10909	D	D	D	P17697	D	D	D	P17697	D	D	D
Clusterin	374	K	N	LEQLNEQFNWVSRLANLTQGEDQYYLRVTTV	395.04	2	843.915	-0.839	P10909	D	D	D	P10909	D	D	D
Clusterin	86	K	N	LSNLEEAKKKKEDALNETRESETKLKELPGV	298.58	2	603.814	0.59883	P10909	D	D	D	P10909	D	D	D
Clusterin	354	K	N	RKYNELLKSYQWKMLNTSSLLEQLNEQFNWV	305.51	3	811.058	5.8498	P10909	D	D	D	P10909	D	D	D
Clusterin	145	K	N	RSGSGLVGRQLEEFLNQSSPFYFWMNGDRID	228.01	3	1189.55	0.021979	P10909	D		D	P10909	D	D
Clusterin	103	K	N	TRESETKLKELPGVCNETMMALWEECKPCLK	189.09	3	980.463	-1.1628	P10909	D	D	D	P10909	D	D	D
Clusterin	320	S	N	CSASNPTQTLLRQQLNASLQLAEKFSRLYDQ	182.71	3	579.312	1.9178									P17697	D	D	D	P17697
Clusterin	366	S	N	LKQLNEQFTWVSQLANLTQSDDQHYLQVFTV	266.86	4	1248.36	-1.2373									P17697	D	D	D	P17697
Clusterin	80	S	N	LSSLEEAKKKKEDALNDTRDSENKLKASQGV	226.33	1	1192.61	-0.038126									P17697	D	D	D	P17697	D	D	D
Clusterin	346	S	N	RLYDQLLQSYQQKMLNTSALLKQLNEQFTWV	131.44	2	497.28	0.27066									P17697	D	D	D	P17697	D	D	D
Clusterin	97	S	N	TRDSENKLKASQGVCNETMTALWEECKPCLK	352.85	3	872.388	-1.319									P17697	D	D	D	P17697
CMP-N-acetylneuraminate-beta-galactosamide-alpha-2,3-sialyltransferase 1	114	S	N	RWWLRLQREKKPNNLNDTIKELFRVVPGNVD	138.99	2	580.314	0.6364	Q11201	D	D		Q11201	D	D	D
Coagulation factor IX	307	K	N	EQKRNVIRAIPYHSYNASINKYSHDIALLEL	124.47	2	740.869	0.47899									P00741	D	D	D
Coagulation factor V	964	S	N	ANENKTVNKLPNSPQNDSRTWGENIPFKNSH	83.397	2	565.77	0.58404									Q28107	D	D	D	Q28107		D
Coagulation factor V	902	S	N	TRFPAHKTRTRLSQDNSSSSRMGPWEDIPSD	118.4	2	542.244	2.7431									Q28107	D	D
Coagulation factor V	1044	S	N	VPLSPRSFHPLRGEVNASFSDRRHNHSLLLH	65.5	2	542.743	0.2318									Q28107		D	D
Collagen type V alpha 1 chain	139	U	N	SDGKWHRIALSVHKKNVTLILDCKKKTTKFL	115.14	2	603.836	1.1347									G3MZI7	D	D
Collagen type XIV alpha 1 chain	373	U	N	TELMTSEVTARSFMVNWTHAPGKVEKYRIVY	135.26	2	689.329	-0.023652									E1BA17	D	D	D
Collectin-12	386	U	N	CTDTLTKHTDDLTSLNNTLANIRLDSVSLRM	124.62	3	600.971	0.1496													A6QP79	D	D
Collectin-12	271;271	S;S	N	DWLKEKVQSLQTLAANNSALAKANNDTLEDM	159.18	2	816.446	0.35819	Q5KU26	D	D	D									A6QP79	D	D	D
Colony stimulating factor 2 receptor beta common subunit	58	U	N	IICRWADTQDAQRLVNVTLYRRPKEDHPQRV	105.14	2	490.787	-0.12897									F1MXH7		D	D	F1MXH7	D	D	D
Complement C1q subcomponent subunit A	146	K	N	VIFDTVITNQEEPYQNHSGRFVCTVPGYYYF	62.848	3	1044.82	0.12962					P02745		D	D
Complement C1q subcomponent subunit A	146	S	N	VVFGKVITNQENVYQNNTGRFRCSVPGYYYF	198.87	2	878.418	1.3655									Q5E9E3	D	D	D	Q5E9E3	D	D
Complement C1r subcomponent-like protein	242	K	N	QCMPVCGRPVTPIAQNQTTLGSSRAKLGNFP	119.45	2	836.941	2.7284	Q9NZP8	D		D	Q9NZP8		D	D
Complement C2	652	S	N	TNCVKVVLEDKTTFPNLTDVREVVTDQFLCS	69.979	2	583.801	-0.46117									Q3SYW2	D	D	D
Complement C3	85	K	N	SSEKTVLTPATNHMGNVTFTIPANREFKSEK	301.73	2	1129.58	1.0536	P01024	D	D	D	P01024	D	D	D
Complement C4	504	S	N	SAYWIASYTAEEKGLNVTLSSLGRSGLKSHV	107.03	2	560.316	-0.96195									P01030	D	D	D	P01030	D		D
Complement C4-A	1328	K	N	SAYWIASHTTEERGLNVTLSSTGRNGFKSHA	141.89	2	554.298	0.63208	P0C0L4	D	D	D	P0C0L4	D	D	D
Complement C4-A	226	K	N	GTWKISARFSDGLESNSSTQFEVKKYVLPNF	190.82	3	635.97	0.11614	P0C0L4	D	D	D	P0C0L4	D	D	D
Complement component 1, r subcomponent	388	U	N	IKDCGQPRSLLNGAFNYTTREGVNTYEARIQ	91.858	2	681.837	0.64879									A5D9E9	D	D	D	A5D9E9		D	D
Complement component C8 alpha chain	437	K	N	RVRGGSSGWSGGLAQNRSTITYRSWGRSLKY	141.58	2	668.81	-0.98791	P07357		D	D	P07357	D	D	D
Complement component C8 beta chain	243	K	N	EFILKEYESYSDFERNVTEKMASKSGFSFGF	78.902	3	633.611	-0.35934	P07358		D	D	P07358	D	D	D
Complement component C9	415	K	N	FNKDDCVKRGEGRAVNITSENLIDDVVSLIR	216.19	2	987.536	-0.91749	P02748		D	D
Complement component C9	456	S	N	ATELKEKLLRGARMINVTDFVNWAASLNHAP	192.45	3	891.131	0.14173									Q3MHN2	D	D	D
Complement decay-accelerating factor	95	K	N	ICLKGSQWSDIEEFCNRSCEVPTRLNSASLK	188.96	2	815.838	-0.07798	P08174	D	D	D	P08174	D	D	D
Complement factor B	122	S	N	QDFENGEYWPRAAYYNLSDEISFRCYDGYTL	129.71	2	776.364	3.0033									P81187	D	D	D
Complement factor H	822	K	N	KIPCSQPPQIEHGTINSSRSSQESYAHGTKL	136.04	3	675.33	1.0829	P08603	D	D		P08603	D	D	D
Complement factor H	911	K	N	KLSYTCEGGFRISEENETTCYMGKWSSPPQC	142.91	2	782.823	-0.13902	P08603	D	D	D	P08603	D	D	D
Complement factor H	1029	K	N	VTYTCATYYKMDGASNVTCINSRWTGRPTCR	175.28	2	714.311	0.20551	P08603	D	D	D	P08603	D	D	D
Complement factor H	775	S	N	PEGRQAHKIEYDHNTNKSYQCRGKSEHKHSI	76.17	3	379.508	-0.053206									Q28085	D	D	D
Complement factor H-related protein 1	126	K	N	QIICNTGYRLQNNENNISCVERGWSTPPKCR	136.99	2	796.865	0.27102	Q03591	D	D	D	Q03591	D	D	D
Complement factor H-related protein 3	108	K	N	ENGYNQNYGRKFVQGNSTEVACHPGYGLPKA	101.15	3	688.663	-0.25587	Q02985	D	D	D	Q02985	D	D	D
Complement factor I	494	S	N	ERVFSLQWGEVKLISNCSKFYGNRFYEKEME	120.65	2	412.707	-0.019102	P05156	D	D	D	P05156	D	D	D
Complement factor I	177	K	N	GADTQRRFKLSDLSINSTECLHVHCRGLETS	101.2	3	681.987	0.74185	P05156		D	D	P05156	D	D	D
Complement factor I	103	K	N	QKSLECLHPGTKFLNNGTCTAEGKFSVSLKH	113.77	2	657.798	-0.062346	P05156	D	D	D	P05156	D	D	D
Complement factor I	529	U	N	QKVYSLRWGEVHLINNCSEFYPGRYFEKEMQ	158.17	3	695.315	-0.78675									Q32PI4	D	D	D
Complement factor properdin	428	U	N	KFSPTVTMVEGQGEKNVTFWGKPFVQCDVLQ	136.58	3	782.384	-2.286									Q17QC8	D		D
Complement receptor type 1	578	S	N	GMVHVITDIQVGSRINYSCTTGHRLIGHSSA	177.06	3	404.517	-0.17556	P17927	D	D	D
Complement receptor type 1	897	S	N	HTGKPLEVFPFGKAVNYTCDPHPDRGTSFDL	68.44	3	483.21	-0.10003	P17927		D	D
Complement regulatory protein variant	92	U	N	QPVTPGQVLALVCQDNNTWSSLQEGCKKRRC	201.6	2	1676.8	2.6044									A0A075TEJ1	D	D	D	A0A075TEJ1	D	D
C-type lectin domain family 12 member A	80	U	N	HVTLKIEMKKMNKLQNISEELQRNISLQLMS	83.862	2	616.822	1.9723	Q5QGZ9	D	D	D
CUB domain containing protein 1	180	S	N	GRIDATVVRIGTFCSNGTVSRIKMQEGVKMA	126.12	2	651.306	0.0035295	Q9H5V8	D	D	D	Q9H5V8		D
CUB domain containing protein 1	386	S	N	VPGCFVCLESRTCSSNLTLTSGSKHKISFLC	114.56	2	679.821	0.0271	Q9H5V8	D	D	D	Q9H5V8	D		D
CUB domain containing protein 1	179	U	N	RVDASTMVRIGTFCGNGTVSRIKMQEGVNLA	86.772	2	636.3	-0.2006													G3N093	D	D
Cyclic AMP-dependent transcription factor ATF-6 alpha	584	K	N	VSFRRDHLLLPATTHNKTTRPKMSIVLPAIN	83.182	2	681.867	0.7313	P18850	D	D	D
Cysteine-rich secretory protein 2	65	U	N	RGVSPPPSNMLKMQWNTTAAANAQNWANKCL	284.38	3	642.624	0.63065									Q3ZCL0	D	D		Q3ZCL0	D	D
Cysteine-rich with EGF-like domain protein 2	190	U	N	PLCTDCMDGYFSSLRNETHSICTACDESCKT	79.805	2	907.847	1.2808					Q6UXH1		D	D
Cysteine-rich, angiogenic inducer, 61	83	U	N	QPCDHTKGLECNFGANSTALKGICRAQSEGR	131.53	2	742.85	1.0732									Q3ZC35	D	D	D
Cystinosin	107	S	N	QSVGQVTTYLHGNHSNQTSPRIRFLVIHSNI	208.4	3	868.752	-0.028476									A7MB63	D	D	D	A7MB63	D	D	D
Cystinosin	104	S	N	VTSQSVGQVTTYLHGNHSNQTSPRIRFLVIH	208.4	3	868.752	-0.028476									A7MB63	D	D	D	A7MB63	D	D	D
Cytochrome b-245 heavy chain	240	K	N	ERIVRGQTAESLAVHNITVCEQKISEWGKIK	247.91	2	994.486	0.48847	P04839	D	D	D
Cytochrome b-245 heavy chain	149	K	N	SDPYSVALSELGDRQNESYLNFARKRIKNPE	84.054	2	622.793	0.14493	P04839		D	D
Cytochrome b-245 heavy chain	247	S	N	TAESLLKHQPRNCYQNISQWGKIENCPIPEF	163.66	2	700.811	-0.38485									O46522	D	D	D	O46522	D	D
DBH-like monooxygenase protein 1	517	S	N	VTTWPFIIKSPKQYKNLSFMDAMNKFKWTKK	135.65	2	796.87	0.41333	Q6UVY6	D	D	D	Q6UVY6	D	D	D
Deleted in malignant brain tumors 1 protein	1889	K	N	YNSFPSDATLRLVNLNSSYGLCAGRVEIYHG	87.18	2	763.88	0.36952	Q9UGM3		D	D
Desmoglein 2	175	U	N	SVEELSAAHTLVMKINATDADEPNTLNSKIS	95.347	2	803.378	0.70418									F1MFC2		D	D
Desmoglein-1	110	K	N	PPYGIFVINQKTGEINITSIVDREVTPFFII	109.22	2	660.848	0.70736	Q02413	D	D	D
Dickkopf-like 1 (Soggy)	88	U	N	PRNYHQEENQERRLGNNTLSSHLQIDKVTDN	113.59	3	514.938	0.084897									Q2YDK6	D	D	D
Dipeptidase 1	279	K	N	MVNFYNNYISCTNKANLSQVADHLDHIKEVA	142.74	2	782.404	-0.10973					P16444	D	D	D
Dipeptidase 1	57	K	N	QLLDMFNNRLQDERANLTTLAGTHTNIPKLR	132.65	2	777.922	0.81606					P16444	D	D	D
Dipeptidyl peptidase 1	119	K	N	FFKYKEEGSKVTTYCNETMTGWVHDVLGRNW	157.12	3	748.01	-0.31539	P53634	D	D	D	P53634	D	D	D
Dipeptidyl peptidase 1	53	K	N	TWVFQVGSSGSQRDVNCSVMGPQEKKVVVYL	90.759	2	683.797	-1.1323	P53634	D	D	D	P53634	D	D	D
Dipeptidyl peptidase 1	53	S	N	TWVFQVGSSGSQRDVNCSVMGPPEKKVVVHL	89.959	2	668.294	0.93602									Q3ZCJ8	D	D	D
Dipeptidyl peptidase 1	144	S	N	VLGRNRACFTGRKTGNTSENVNVNTARLAGL	132.65	2	740.35	0.32442									Q3ZCJ8	D	D	D
Disintegrin and metalloproteinase domain-containing protein 10	278;278	K;S	N	SGIRNISFMVKRIRINTTADEKDPTNPFRFP	229.23	2	861.415	1.6121	O14672	D	D	D	O14672	D	D	D	Q10741	D	D	D	Q10741		D	D
Disintegrin and metalloproteinase domain-containing protein 17	539	S	N	NCQFETAQKKCQEAINATCKGVSYCTGNSSE	84.687	2	599.26	-1.0794	P78536	D	D
Disintegrin and metalloproteinase domain-containing protein 17	174	S	N	TKDKRMLVYKSEDIKNVSRLQSPKVCGYIKA	112.36	2	525.769	0.23874	P78536	D	D	D
Disintegrin and metalloproteinase domain-containing protein 8/ADAM metallopeptidase domain 8	612	S	N	CWKGRCQDLHVYRSSNCSAQCHNHGVCNHKQ	136.17	3	667.265	-0.65191	P78325	D		D
Disintegrin and metalloproteinase domain-containing protein 8/ADAM metallopeptidase domain 8	615	U	N	CWDGFCQGLHVYRSRNCSAQCNSHGECNHKG	97.235	4	512.955	-0.27809									F1MIY8	D	D		F1MIY8		D	D
DKK3 protein	204	U	N	LCVWGRCTKTSTAGSNGTICDNQRDCQPGLC	121.31	2	792.844	-0.36083									A6QL81	D		D
DKK3 protein	106	U	N	PPSYHNETNTETKVGNNTIHVHREIHKITNN	98.943	3	383.872	0.24312									A6QL81	D	D	D
DNA polymerase theta	2205	U	N	LHPLPGLILEWRRITNAITKVVFPLQREKRL	116.9	2	382.226	-0.040971	O75417	D	D	D	O75417	D	D	D
Dolichyl-diphosphooligosaccharide--protein glycosyltransferase subunit STT3A	548;548	K;S	N	TAMANRTILVDNNTWNNTHISRVGQAMASTE	208.39	2	950.974	0.29146	P46977	D	D	D	P46977	D	D	D	Q2KJI2	D	D	D	Q2KJI2	D	D	D
Dolichyl-diphosphooligosaccharide--protein glycosyltransferase subunit STT3A	544	K	N	GYQITAMANRTILVDNNTWNNTHISRVGQAM	98.421	2	952.468	4.5523					P46977		D	D
Dolichyl-diphosphooligosaccharide--protein glycosyltransferase subunit STT3B	627;623	K;U	N	AGMANRTTLVDNNTWNNSHIALVGKAMSSNE	168.89	3	700.692	-0.082633	Q8TCJ2	D	D	D	Q8TCJ2	D	D	D	A5D7G6	D	D	D	A5D7G6	D		D
Dolichyl-diphosphooligosaccharide--protein glycosyltransferase subunit STT3B	616	S	N	VMSWWDYGYQIAGMANRTTLVDNNTWNNSHI	79.022	2	1033.95	-0.018669	Q8TCJ2	D	D		Q8TCJ2	D	D
Dolichyl-diphosphooligosaccharide--protein glycosyltransferase subunit STT3B	641;637	S;U	N	WNNSHIALVGKAMSSNETAAYKIMRTLDVDY	90.653	2	596.258	0.75646	Q8TCJ2	D	D	D	Q8TCJ2	D	D	D	A5D7G6	D	D	D	A5D7G6	D	D
Double-stranded RNA-binding protein Staufen homolog 1	327	U	N	GLPRRREFVMQVKVGNHTAEGTGTNKKVAKR	220.85	3	472.904	0.13926	O95793	D		D	O95793	D	D	D
DPP7 protein	433	U	N	SNGDLDPWARGGIQSNLSASVLAITIHGGAH	155.49	4	660.858	0.26865									A6QNX2	D	D	D
DR-beta chain MHC class II	11	U	N	_____EYATSECHFFNGTERVRFLDRYFHNG	88.507	3	617.589	0.44886									Q30274		D	D
Dystroglycan	141	S	N	KGVHYISVSAARLGANGSHVPQTSSVFSIEV	158.77	4	843.407	0.30516									O18738	D	D	D
E3 ubiquitin-protein ligase RNF128	59	D	N	TAYLNVSWRVPHTGVNRTVWELSEEGVYGQD	89.296	2	441.738	1.0448	Q8TEB7	D	D	D	Q8TEB7	D		D
Ectonucleoside triphosphate diphosphohydrolase 3	149	S	N	IHLGATAGMRLLRLQNETAANEVLESIQSYF	260.31	2	1094.04	0.36812	O75355	D	D	D	O75355	D	D	D
Ectonucleoside triphosphate diphosphohydrolase 3	81	S	N	SRTTVYVYQWPAEKENNTGVVSQTFKCSVKG	280.56	2	1398.18	3.2617	O75355	D	D	D	O75355	D	D	D
Ectonucleotide pyrophosphatase/phosphodiesterase family member 3	698	S	N	ADKNITHGFLYPPANNRTSNSQYDALITSNL	104.87	4	836.644	-0.96756													P15396	D	D	D
Ectonucleotide pyrophosphatase/phosphodiesterase family member 3	686	S	N	APSESQNCSFSLADKNITHGFLYPPANNRTS	104.87	4	836.644	-0.48492													P15396	D	D	D
Ectonucleotide pyrophosphatase/phosphodiesterase family member 3	677	S	N	DCLRADVRVAPSESQNCSFSLADKNITHGFL	104.87	3	1115.19	-0.62567													P15396	D	D	D
Ectonucleotide pyrophosphatase/phosphodiesterase family member 3	279	S	N	LKVGTYFWPGSDVAINGTFPSIYKIYNRSVT	138.04	2	1211.6	-0.3677													P15396	D	D	D
Embigin	140	U	N	DSVVLMCKCQDCLPLNWTWYGGNGSVQVPIG	52.92	3	1093.85	-0.82475									F1MF38		D	D
Embigin	147	U	N	KCQDCLPLNWTWYGGNGSVQVPIGVPVNDKY	52.92	3	1093.85	-0.82475									F1MF38		D	D
Embigin	68	U	N	TWKKGDKLLEGNYLVNATGGILYTQHRVAVI	198.24	3	745.727	-0.048614									F1MF38	D	D	D
EMID1 protein	51	U	N	WCSYVVTRTVSCHVQNGTYLQRVLQNCPWPM	116.96	2	833.399	0.9599									A6QPG8	D		D
EMILIN-3	732	U	N	PLRPREGLWSHVDQLNRTLAQHTQDIARLRD	102.66	2	728.857	1.3558	Q9NT22		D	D
Endoglin	130	U	N	LAYDSKLVFHEALDANITQLPSFTTKDQLLN	141.07	3	750.063	-0.053721									Q1RMV1	D	D
Endopin 2C	218	U	N	NYIFFKAQWKTPFNPNHTYESEFHVSKNERV	281.5	2	1018.97	0.0097789									Q32T06	D	D	D	Q32T06		D	D
Endoplasmic reticulum aminopeptidase 1	414	K	N	YFFGKCFDAMEVDALNSSHPVSTPVENPAQI	178.58	3	996.463	0.12728					Q9NZ08	D	D	D
Endoplasmic reticulum aminopeptidase 2	425	U	N	SFSNTCFEVIKRDSLNSSHPISNEAKTATQI	172.26	2	751.354	0.12295									A6QPT7	D	D	D	A6QPT7	D	D
Endoplasmic reticulum resident protein 29	187	U	N	SGVEARQALLKQGQDNLSSVKETQKKWAEQY	94.692	2	539.767	-0.033491	P30040	D	D	D	P30040	D	D	D
Endoplasmin	217	K	N	AFLVADKVIVTSKHNNDTQHIWESDSNEFSV	233.28	2	1357.6	0.28517	P14625	D	D	D	P14625	D	D	D
Endoplasmin	502	S	N	EFGTNIKLGVIEDHSNRTRLAKLLRFQSSHH	76.143	2	571.788	-0.5991	P14625		D	D	P14625	D	D	D
Endoplasmin	62	K	N	EVVQREEEAIQLDGLNASQIRELREKSEKFA	192.4	3	911.114	-0.16916	P14625	D	D	D	P14625	D	D	D
Endothelin-converting enzyme 1	166	K	N	NLWEHNQAIIKHLLENSTASVSEAERKAQVY	110.77	2	823.399	-1.2577					P42892	D	D
ENTPD2 protein	319	U	N	SSDPALCRSLVSQLFNSSSCHFSRCSFNGVF	174.62	3	620.293	-0.10769									A7YWN0	D	D	D
ENTPD2 protein	378	U	N	VATLQQLEGAVVTLCNQTWSELQARAPDDRA	116.52	3	1139.59	1.4515									A7YWN0	D	D
Ephrin-A1	26;26	K;U	N	LCCSLAAADRHTVFWNSSNPKFRNEDYTIHV	170.4	2	660.317	0.20579	P20827	D	D	D	P20827	D	D		Q3ZC64	D	D	D	Q3ZC64	D	D	D
Ephrin-B2	36	K	N	RTAISKSIVLEPIYWNSSNSKFLPGQGLVLY	96.993	2	870.44	1.1997					P52799	D		D
Epithelial cell adhesion molecule	37	S	N	ADQEGCVCENYKLTTNCSVNALGQCQCTSVG	107.76	3	1043.14	-0.70224									Q3T0L5	D	D		Q3T0L5	D	D
Epithelial membrane protein 1	43	U	N	WVVSDLGTGSVGLWKNCTSGGCGDNLSYAGE	156.67	2	1046.43	-0.58213									E1BI85	D	D	D	E1BI85	D	D
ER membrane protein complex subunit 1	913	K	N	YSPDVQIHAERFINYNQTVSRMRGIYTAPSG	123.79	2	622.811	-1.1777	Q8N766	D	D	D	Q8N766	D	D	D
ER membrane protein complex subunit 7	184	U	N	MVLPLLIFVLLPKVVNTSDPDMRREMEQSMN	86.898	2	568.761	-0.07635					Q9NPA0		D	D
Erlin-1	106	K	N	VVNMLAPYAVFDIVRNYTADYDKTLIFNKIH	115.71	1	992.409	0.59962	O75477	D	D	D	O75477	D	D	D
ERO1-like protein alpha	280;280	K;S	N	RYLLQDTWLEKKWGHNITEFQQRFDGILTEG	171.92	2	709.839	0.11869	Q96HE7	D	D	D	Q96HE7	D	D	D	A5PJN2	D	D	D
ERO1-like protein beta	145	S	N	CEQASKLGAINSTLSNQSKEAFIDWARYDDS	96.591	2	669.848	2.4641					Q86YB8	D	D
ERO1-like protein beta	140	K	N	KELEDCEQASKLGAINSTLSNQSKEAFIDWA	96.591	2	669.848	2.4641					Q86YB8	D	D
Extracellular sulfatase Sulf-2	171	S	N	GWKEWVGLLKNSRFYNYTLCRNGVKEKHGSD	143.12	2	570.257	-0.25963	Q8IWU5	D	D	D	Q8IWU5	D	D	D
Extracellular sulfatase Sulf-2	112	S	N	TGKYVHNHNTYTNNENCSSPSWQAQHESRTF	191.42	4	791.585	0.35224	Q8IWU5	D	D	D	Q8IWU5	D	D	D
Extracellular sulfatase Sulf-2	241	S	N	HGPEDSAPQYSRLFPNASQHITPSYNYAPNP	107.45	3	793.05	0.62543	Q8IWU5	D	D	D	Q8IWU5	D	D	D
Extracellular sulfatase Sulf-2	198	K	N	HGSDYSKDYLTDLITNDSVSFFRTSKKMYPH	228.19	3	636.975	-0.17454	Q8IWU5	D	D	D	Q8IWU5	D	D	D
Extracellular sulfatase Sulf-2	132	S	N	SWQAQHESRTFAVYLNSTGYRTAFFGKYLNE	174.42	2	697.845	0.66684	Q8IWU5	D	D	D	Q8IWU5	D	D	D
Extracellular sulfatase Sulf-2	149	S	N	TGYRTAFFGKYLNEYNGSYVPPGWKEWVGLL	58.885	2	895.42	-0.36667	Q8IWU5		D	D
Factor XIIa inhibitor	176	S	N	GETRVSLEHLLSYPQNFSCVHHALRAFMSEG	266.62	3	837.421	2.3042									P50448	D	D	D
FAD-dependent oxidoreductase domain-containing protein 2	143	K	N	YLGDFADTLGLRVQYNTTIAHVTLDKDRQAW	92.977	3	626.326	-0.12245	Q8IWF2		D		Q8IWF2	D	D	D
FAM20C, golgi associated secretory pathway kinase	438	U	N	GNMDRHHYETFEKFGNETFIIHLDNGRGFGK	102.28	3	545.939	0.25096									F1MXQ3	D	D	D
Fc gamma receptor I	209	U	N	LRTSFSSPHQEGNLVNLSCETKLPSEKPGQQ	63.184	3	746.679	-0.072813									Q9MZT0		D	D
Ferritin heavy chain	112	U	N	GLNAMECALHLEKNVNQSLLELHKLATDKND	129.69	2	649.353	-0.56497	P02794	D	D	D	P02794	D	D	D
Fetuin-B	271	S	N	TCSFFNSQAPTPRGENATVNQRPANPSKTEE	198.89	2	793.394	0.45734									Q58D62	D	D	D	Q58D62		D
Fibrillin-1	1902	S	N	TMCLDINECERDACGNGTCRNTIGSFNCRCN	113.71	2	507.187	-0.051058	P35555	D		D
Fibrinogen beta chain	394	K	N	AGNALMDGASQLMGENRTMTIHNGMFFSTYD	236.82	2	949.921	-1.2797	P02675	D	D	D	P02675	D	D	D
Fibrinogen gamma chain	78	K	N	DKDLQSLEDILHQVENKTSEVKQLIKAIQLT	372.9	4	668.348	0.52915	P02679	D	D	D	P02679	D	D	D
Fibrinogen gamma chain	76	S	N	DKDLRTLEGILYQVENKTSEARELVKAIQIS	161.93	2	705.374	0.12278									P12799	D	D	D
Fibroblast growth factor receptor like 1	205	U	N	SGKYTCRVSNRAGAINATYKVDVIQRTRSKP	70.028	2	456.24	-0.43081									F1MQI5	D	D	D
Fibroblast growth factor-binding protein 1	155	K	N	RVCRKKFPESNLKLVNSTLIRIKKPSQELME	116.73	2	459.779	0.056846									Q9MZ06	D	D	D	Q9MZ06		D	D
Fibroleukin	265	S	N	AGGWTVLQARVDGSTNFTRTWQDYKVGFGNL	84.17	2	500.235	0.74486									Q29RY7	D	D	D
Fibroleukin	338	S	N	VANEFLKYRLHIGNYNGTAGDALRFSKHYNH	63.894	3	525.598	-0.40078									Q29RY7	D	D	D
Fibromodulin	166	K	N	FSKLRHLERLYLDHNNLTRIPSPLPRSLREL	117.67	3	421.219	0.30376									P13605	D	D	D
Fibromodulin	201	K	N	NQISRVPNNALEGLENLTALYLHHNEIQEVG	129.51	4	831.667	0.71387									P13605	D	D
Fibronectin	430	K	N	SNGALCHFPFLYNNHNYTDCTSEGRRDNMKW	132.24	3	1070.11	0.66812					P02751		D	D
Fibronectin	542;543	K;S	N	VNDTFHKRHEEGHMLNCTCFGQGRGRWKCDP	238.83	3	703.296	-0.1152	P02751	D	D	D	P02751	D	D	D	P07589	D	D	D
Fibronectin	528	S	N	QLRDQCIVDDITYNVNDTFHKRHEEGHMLNC	200.9	2	1100.49	0.035421	P02751		D	D	P02751	D	D	D
Fibronectin	529	S	N	QLRDQCIVDGITYNVNDTFHKRHEEGHMLNC	212.37	2	1071.49	2.3558									P07589	D	D	D	P07589	D	D	D
Fibulin-1	98	U	N	NLANEQDSCATPRGDNTSLEAMFVKRCCHCC	80.312	2	657.81	0.12171									A5D7S8		D	D
Folate receptor 2 (Fetal)	77	U	N	ARVSQELHKDTSSLYNFTWDHCGKMEPACQR	288	4	664.556	-1.3079									Q0VCN9	D	D	D	Q0VCN9	D	D	D
Folate receptor alpha	161	K	N	CRTSYTCKSNWHKGWNWTSGFNKCAVGAACQ	302.64	2	926.426	-1.822	P15328	D	D	D	P15328	D	D	D
Folate receptor alpha	35	U	N	GEAQTRIAWARTELLNVCMNAKHHKEKPGPE	125.75	2	648.315	0.063566	P15328	D	D	D	P15328	D	D	D
Folate receptor alpha	63	U	N	GPEDKLHEQCRPWRKNACCSTNTSQEAHKDV	74.769	2	1255.54	0.44004					P15328	D	D
Folate receptor alpha	69	K	N	HEQCRPWRKNACCSTNTSQEAHKDVSYLYRF	410.33	2	1255.54	0.44004	P15328	D	D	D	P15328	D	D	D
Folate receptor alpha	87	U	N	QEAHKDVSYLYRFNWNHCGEMAPACKRHFIQ	137.93	3	575.567	-0.32804	P15328	D	D	D	P15328	D	D	D
Folate receptor alpha	160	K	N	CRTSYTCKSNWHKGWNWTSGYNQCPVKAACH	187.44	2	851.869	5.0195									P02702	D	D	D	P02702	D	D	D
Folate receptor alpha	57	U	N	GPEDKLHGQCSPWKKNACCFVNTSIEAHKDI	128.9	3	552.909	1.1665									E1BJL8	D	D		E1BJL8	D	D	D
Folate receptor alpha	68	K	N	HEQCSPWRKNACCSVNTSIEAHKDISYLYRF	192.86	3	532.897	2.106									P02702	D	D	D	P02702		D	D
Folate receptor alpha	63	U	N	HGQCSPWKKNACCFVNTSIEAHKDISSLYRF	270.99	3	830.054	-0.28641									E1BJL8	D	D	D	E1BJL8	D	D	D
Folate receptor alpha	115	U	N	LYECSPNLGPWIREVNQSWRKERILNVPLCK	118.69	2	461.219	-0.026924									E1BJL8	D	D	D	E1BJL8	D	D	D
FOLH1 protein	645	U	N	DSLFSAVKNFTEIASNFSERLQDLDKNNPIL	112.51	2	710.822	0.64406									A6QLT8	D	D	D
FOLH1 protein	76	U	N	FLDELKAENIKTFLYNFTRIPHLAGTEQNFQ	93.267	2	532.769	-1.5157									A6QLT8	D	D	D
FOLH1 protein	638	U	N	KTYSVSFDSLFSAVKNFTEIASNFSERLQDL	112.51	2	710.822	0.64406									A6QLT8	D	D	D
FOLH1 protein	613	U	N	RDYAVVLRKYADNIYNISMKHPQEMKTYSVS	124.12	2	667.813	0.10179									A6QLT8	D	D	D
FOLH1 protein	476	U	N	TLRVDCTPLMYSLVYNLTKELRSPDEGFEGK	109.35	3	640.651	-0.35608									A6QLT8	D	D	D
Follistatin-related protein 1	144;143	S;S	N	LEAEIIPDGWFSKGSNYSEILDKYFKNFDNG	110.54	2	564.769	0.011556	Q12841	D	D	D	Q12841	D	D	D	Q58D84	D	D	D
Galactoside 3(4)-L-fucosyltransferase	185	U	N	GWLEPWSGQPAHPPLNLSAKTELVAWAVSNW	107.58	3	1071.85	0.45741					P21217	D		D
Galectin-3-binding protein	551	K	N	DFEGWKAAIPSALDTNSSKSTSSFPCPAGHF	120.87	2	639.327	0.379	Q08380	D	D	D	Q08380	D	D	D
Galectin-3-binding protein	69	K	N	DLTDASVVCRALGFENATQALGRAAFGQGSG	161.94	1	1350.69	0.26938	Q08380	D	D	D	Q08380	D	D	D
Galectin-3-binding protein	398	K	N	FHTVPFQLLARYKGLNLTEDTYKPRIYTSPT	190.15	2	705.361	0.54351	Q08380	D	D	D	Q08380	D	D	D
Galectin-3-binding protein	580	K	N	HFNGFRTVIRPFYLTNSSGVD__________	125.89	2	836.427	0.46979	Q08380	D	D	D	Q08380	D	D	D
Galectin-3-binding protein	125	K	N	KSNCRHERDAGVVCTNETRSTHTLDLSRELS	129.82	2	612.774	-0.45655	Q08380	D	D	D	Q08380	D	D	D
Galectin-3-binding protein	192	K	N	TANLEAQALWKEPGSNVTMSVDAECVPMVRD	129.15	2	1048.96	-0.36853					Q08380	D	D	D
Galectin-3-binding protein	521	U	N	DFKGWKALVPSALATNSSRSTSLFPCPSGVF	77.912	2	645.351	1.2688									A7E3W2	D	D	D	A7E3W2	D	D	D
Galectin-3-binding protein	125	S	N	RSNCRHDKDASVICTNETRGVYTLDLSGELP	129.82	3	550.254	-0.39717									A7E3W2		D	D
Gamma-glutamyltransferase 5	303	S	N	GGAILSFILNVLRGFNFSTESMARPEGRVNV	138.77	3	568.923	0.34353	P36269	D	D	D	P36269	D	D	D
Gamma-glutamyltranspeptidase 1	230	K	N	DTYETLAIEGAQAFYNGSLTAQIVKDIQAAG	234.74	2	1721.9	1.8653	P19440	D	D	D	P19440	D	D	D
Gamma-glutamyltranspeptidase 1	511	K	N	KRAVEEPRLHNQLLPNVTTVERNIDQAVTAA	182.33	3	547.298	-0.14012	P19440	D	D	D	P19440	D	D	D
Gamma-glutamyltranspeptidase 1	120	K	N	NAREVAPRLAFATMFNSSEQSQKGGLSVAVP	197.19	2	846.395	1.003	P19440	D	D	D	P19440	D	D	D
Glucoside xylosyltransferase 1	237	K	N	FLRPVDDIWSLLKKFNSTQIAAMAPEHEEPR	63.374	3	686.998	0.71665					Q4G148	D	D	D
Glucosylceramidase	309	K	N	HQRDFIARDLGPTLANSTHHNVRLLMLDDQR	235.22	2	817.91	-0.17622	P04062	D	D	D	P04062	D	D	D
Glucosylceramidase	185	K	N	RTYTYADTPDDFQLHNFSLPEEDTKLKIPLI	190.88	3	950.755	0.26754					P04062	D	D	D
Glucosylceramidase	309	S	N	HQRDFIARDLGPILANSTHRDVRLLMLDDQR	91.093	2	648.843	0.6414									Q2KHZ8	D		D
Glucosylceramidase	98	S	N	RSGRRMELSLGTIQANRTGTGLLLTLQPDQK	86.911	2	668.345	0.039026									Q2KHZ8		D	D
Glucosylceramidase	208	S	N	VKLKIPLIHQALELANRSVSLFASPWTSPTW	110.38	2	745.932	-1.2157									Q2KHZ8		D	D
Glutamate carboxypeptidase 2	76	K	N	FLDELKAENIKKFLYNFTQIPHLAGTEQNFQ	125.88	3	861.776	0.15096	Q04609	D	D	D	Q04609	D	D	D
Glutamate carboxypeptidase 2	336	K	N	GSLKVPYNVGPGFTGNFSTQKVKMHIHSTNE	216.01	2	908.444	0.1825	Q04609	D	D	D	Q04609	D	D	D
Glutamate carboxypeptidase 2	638	K	N	KTYSVSFDSLFSAVKNFTEIASKFSERLQDF	148.04	3	815.409	-1.8548	Q04609	D	D	D	Q04609	D	D	D
Glutamate carboxypeptidase 2	476	K	N	TLRVDCTPLMYSLVHNLTKELKSPDEGFEGK	119.99	2	947.47	0.35604	Q04609	D	D	D	Q04609	D	D	D
Glutaminyl-peptide cyclotransferase	49	K	N	SAWPEEKNYHQPAILNSSALRQIAEGTSISE	116.51	2	793.912	0.69669	Q16769	D	D	D	Q16769	D	D	D
Glycodelin	81	K	N	PTPEDNLEIVLHRWENNSCVEKKVLGEKTEN	78.098	2	584.745	-0.69557	P09466			D	P09466	D	D	D
Glycoprotein 2	33	U	N	SYILTLSSTEQQGYRNSTNTGSYEKDLDCGA	121.9	2	552.24	0.10734									F1N726	D	D	D	F1N726		D	D
Glycoprotein 2	63	U	N	APGTPEAQLCFDPCQNYTLLNEPFRSTENTE	346.72	3	1168.84	0.75998									F1N726	D	D	D	F1N726	D	D
Glycoprotein 2	120	U	N	CVPTFRCQTSAPLWLNGTHPGLGEGIVNRTA	273.56	3	828.409	0.31777									F1N726	D	D	D	F1N726	D	D	D
Glycoprotein 2	142	U	N	GEGIVNRTACAHWSGNCCLWKTEVLVKACPG	232.13	3	585.242	-0.30289									F1N726	D	D	D	F1N726	D	D	D
Glycoprotein 2	257	U	N	GFGDEVHAYLRDGNWNCSSLRQSEEENWISV	148.56	2	607.748	0.33835									F1N726	D	D	D	F1N726	D	D	D
Glycoprotein 2	339	U	N	KVSLQMALQPIVSSLNITVDGEGEFTVRMAL	224.83	3	974.839	0.95357									F1N726	D	D	D	F1N726	D	D
Glycoprotein 2	132	U	N	LWLNGTHPGLGEGIVNRTACAHWSGNCCLWK	273.56	3	828.409	0.31777									F1N726	D	D	D	F1N726	D	D	D
Glycoprotein 2	211	U	N	RLVSGTWGCFCRQDLNVSDVHSLQPQLDCGD	409.82	3	872.078	-2.9856									F1N726	D	D	D
Glycoprotein 2	288	U	N	TNPTQAGACGNILERNQTHAIYINTLSLVND	340.02	2	1174.63	-0.15584									F1N726	D	D	D	F1N726		D	D
Glycosylated lysosomal membrane protein	185	S	N	TFRGHPIRDPTGAFTNGSLAFRVQAFSTSGR	116.84	2	728.851	0.46702									Q0P5L7	D		D
Glycosylation-dependent cell adhesion molecule 1	95	K	N	NPKLPLSILKEKHLRNATLGSEETTEHTPSD	456.45	3	789.35	-0.24387									P80195	D	D	D	P80195		D	D
Glycosyltransferase 8 domain-containing protein 1	257	S	N	NPGVFVANLTEWRRQNITNQLEKWMKLNVEE	135.43	2	545.785	0.23923					Q68CQ7		D	D
Glypican-1	116	S	N	AAQQRGFDDHFQRLLNDSERALQEAFPGAFG	105.95	2	425.214	-0.55496									G3X745	D	D	D
Glypican-1	79	S	N	QGYTCCTSEMEENLANRSRAELETALLEGTR	139.11	2	1218.49	-2.511									G3X745		D	D
Golgi glycoprotein 1	210;215	S;U	N	FGKGYLVSCLVDHRGNITEYQCHQYITKMTA	201.3	2	879.406	-0.99454	Q92896	D	D	D	Q92896	D	D	D					E1BDY3		D	D
Golgi membrane protein 1	144	S	N	KSYGRLQQDVLQFQKNQTNLERKFSYDLNQC	200.69	2	439.217	-3.2926	Q8NBJ4	D	D	D	Q8NBJ4	D	D	D
Golgi membrane protein 1	109;109	K;U	N	SVNKLYQDEKAVLVNNITTGERLIRTLQDQL	118.48	2	645.351	0.28748	Q8NBJ4	D	D	D	Q8NBJ4	D	D		E1BLA8	52523000	58909000	70697000
GPI ethanolamine phosphate transferase 1	192	S	N	WVFDNVKDFFHHARNNQSLFSKINEEKIVFF	101.25	2	470.735	-0.40635	O95427	D	D	D	O95427	D	D	D
GPI transamidase component PIG-S	370	S	N	RWGGIMVYNVDSKTYNASVLPVRVEVDMVRV	98.048	2	561.806	0.32285	Q96S52	D	D	D	Q96S52	D	D
GPI transamidase component PIG-T	164	K	N	NTVTPTASFKPLGLANDTDHYFLRYAVLPRE	83.087	3	545.607	-1.1299	Q969N2	D		D	Q969N2	D	D	D
G-protein coupled receptor 126	750	S	N	EEDSVLVKRAQFTFFNKTGLFQDVGTKKGTL;PEDSVLVRRAQFTFFNKTGLFQDVGPQRKTL	111.74	2	503.25	0.17846	Q86SQ4	D	D		Q86SQ4	D	D	D
G-protein coupled receptor 126	818	S	N	CAFWDLNKNKSFGGWNTSGCVAHRDSDASET	133.71	3	513.561	-1.2067	Q86SQ4	D	D	D	Q86SQ4	D	D	D
G-protein coupled receptor 126	314	S	N	EIVSLKGDIYNFRLWNFTMNAKILSNLSCNV	117.89	2	564.276	-0.050262	Q86SQ4	D	D	D	Q86SQ4	D	D	D
G-protein coupled receptor 126	143	K	N	HVSFSSDFSIQKKGFNASYIRVAVSLRNQKV	166.96	2	529.779	-0.65668	Q86SQ4	D	D	D	Q86SQ4	D	D	D
G-protein coupled receptor 126	324	K	N	NFRLWNFTMNAKILSNLSCNVKGNVVDWQND	100.48	2	575.805	0.7273	Q86SQ4	D	D	D	Q86SQ4	D	D	D
G-protein coupled receptor 126	811	S	N	QEVHHPICAFWDLNKNKSFGGWNTSGCVAHR	99.891	4	560.776	0.0051458	Q86SQ4		D	D	Q86SQ4	D	D
G-protein coupled receptor 126	505	S	N	TNLEGKIIQQKLLKNNESLDEGLRLHTVNVR	148.68	3	501.935	-0.14918	Q86SQ4	D	D	D	Q86SQ4	D	D	D
Granulins	236	S	N	CCELPSGKYGCCPMPNATCCSDHLHCCPQDT	54.324	4	947.624	-1.0138	P28799	D	D	D
Granulins	265	K	N	DTVCDLIQSKCLSKENATTDLLTKLPAHTVG	134.02	2	554.785	0.043121	P28799	D	D	D	P28799	D	D	D
Granulins	530	K	N	GVKDVECGEGHFCHDNQTCCRDNRQGWACCP	286.14	4	571.709	-0.40747	P28799	D	D	D	P28799	D	D	D
Granulins	524	U	N	GMGNVECGARHFCHDNQTCCPDSQGGWACCP	159.78	4	729.773	-0.88114									Q2HJI6	D	D	D	Q2HJI6		D	D
Granulins	260	U	N	NTVCDLTQSKCLSKENATDLLTKLPAHTVQD	115.79	2	504.261	0.0076356									Q2HJI6	D	D	D
Granulocyte-macrophage colony-stimulating factor receptor subunit alpha	229	K	N	KIERFNPPSNVTVRCNTTHCLVRWKQPRTYQ	110.53	2	582.263	-0.67741	P15509	D	D	D
Granulocyte-macrophage colony-stimulating factor receptor subunit alpha	195	S	N	LDNLSGLTSRNYFLVNGTSREIGIQFFDSLL	118.71	2	587.293	0.84062	P15509		D	D	P15509	D	D	D
Granulocyte-macrophage colony-stimulating factor receptor subunit alpha	223	S	N	SLLDTKKIERFNPPSNVTVRCNTTHCLVRWK	88.681	2	567.295	0.89579	P15509	D	D	D	P15509	D	D	D
Gremlin-2	40	S	N	RPAGAIPSPYKDGSSNNSERWQHQIKEVLAS	167.32	2	484.694	0.46074	Q9H772	D	D	D	Q9H772	D	D	D
Group 3 secretory phospholipase A2	396	S	N	EFQLLNSAQEPLFHCNCTRRLARFLRLHSPP	167.22	3	870.405	-0.61365	Q9NZ20	D	D
Group 3 secretory phospholipase A2	325	S	N	KGPPHQKGSKRPSKANTTALQDPMVSPRLDV	191.06	2	752.372	-0.30622	Q9NZ20	D	D	D	Q9NZ20	D	D	D
Group 3 secretory phospholipase A2	280	K	N	YGTVPLARLQPRTFYNASWSSRATSPTPSSR	100.88	2	611.275	0.15187	Q9NZ20	D	D	D	Q9NZ20	D		D
Growth arrest-specific protein 6	463	K	N	VAGDLFQPERGLYHLNLTVGGIPFHEKDLVQ	112.67	3	633.34	-0.20756	Q14393	D	D
Growth/differentiation factor 8	71;71	S;S	N	IKIQILSKLRLETAPNISKDVIRQLLPKAPP	137.95	2	622.858	-1.0422	O14793		D	D					O18836	D	D	D	O18836	D	D
HAPLN3 protein	65	U	N	VVETPEETLFSHRGANVTLPCRYHYEPALAS	80.239	2	495.75	-0.14995									A5PK97	D	D	D
Haptoglobin	184	K	N	AKGSFPWQAKMVSHHNLTTGATLINEQWLLT	192.47	3	894.798	2.0135	P00738	D	D	D
Haptoglobin	241	K	N	GKKQLVEIEKVVLHPNYSQVDIGLIKLKQKV	169.64	2	899.503	0.7126	P00738	D	D	D	P00738	D	D	D
Haptoglobin	207	K	N	INEQWLLTTAKNLFLNHSENATAKDIAPTLT	175.29	2	732.859	-0.70937	P00738	D	D	D	P00738	D	D	D
Haptoglobin	211	K	N	WLLTTAKNLFLNHSENATAKDIAPTLTLYVG	175.29	2	732.859	-0.70937	P00738	D	D	D	P00738	D	D	D
Haptoglobin	286	S	N	GRVGYVSGWGRNENFNFTEHLKYVMLPVADQ	174.4	2	698.325	0.45503									Q2TBU0	D	D	D	Q2TBU0	D	D	D
Haptoglobin	316	S	N	QDKCVKHYEGVDAPKNKTAKSPVGVQPILNE	112.83	3	420.875	0.31643									Q2TBU0	D	D	D
Heat shock protein HSP 90-beta	46;46	U;U	N	SLYKNKEIFLRELISNASDALDKIRLISLTD;TFYSNKEIFLRELISNASDALDKIRYESLTD	90.926	2	639.819	0.66405	P08238		D	D					Q76LV1	D	D	D
Hemicentin-1	2395	S	N	VHAPPSIIGNHRSPENISVVEKNSVSLTCEA	69.815	2	552.787	-0.54546					Q96RW7		D	D
Hemopexin	453	K	N	DVEKLNAAKALPQPQNVTSLLGCTH______	65.472	2	869.938	-0.01815	P02790	D	D
Hemopexin	263	U	N	KRCSPHLVLSALLSDNHSATYAFSENHYWRL	354.46	3	1094.51	-0.61153									Q3SZV7	D	D	D
Hemopexin	241	S	N	RDYFMSCPNRGHAHRNATQHMDKRCSPHLVL	137.98	2	552.261	-0.25426									Q3SZV7	D	D	D
Hemopexin	218	S	N	RGNKFLRFDPVTGEVNSTYPRDVRDYFMSCP	173.44	3	528.919	1.0605									Q3SZV7	D	D	D
Heparan sulfate proteoglycan 2	1735	U	N	DAGVYICTCRNLHHANTSRAELLVTEAPGKP	88.392	2	526.76	-0.17144									F1MER7	D	D	D	F1MER7	D	D	D
Heparan sulfate proteoglycan 2	3055	U	N	KTRNQELEDNVRISPNGSIITIVGARPSNHG	103.21	2	700.903	-0.00011422									F1MER7	D	D	D
Heparan sulfate proteoglycan 2	68	U	N	LGSGDFQMVYFRALVNFTHSIDYSPQLEDAG	118.51	3	910.092	1.5483									F1MER7	D	D	D
Heparan sulfate proteoglycan 2	3819	U	N	RELRIQGEEIVFHDLNLTAHGISHCPTCRDR	181.38	4	727.6	-0.62923									F1MER7	D	D	D
Heparan sulfate proteoglycan 2	3763	U	N	SLTQGSLIVGSLAPVNGTSQGKFQGLDLNEE	175.77	2	1059.07	0.34402									F1MER7	D	D	D
Heparan sulfate proteoglycan 2	189	U	N	VPRACTEAEFACHRYNECVALEYRCDRRPDC	113.63	2	660.295	-0.6606									F1MER7	D	D	D
Heparan-alpha-glucosaminide N-acetyltransferase	461	U	N	GYLGPGGIGDFGKYPNCTGGAAGYIDRLLLG	81.632	2	759.332	0.21307					Q68CP4	D		D
Heparin cofactor 2/SERPIND1 protein	188	K	N	THEQVHSILHFKDFVNASSKYEITTIHNLFR	154.49	2	435.708	0.32137	P05546	D	D	D	P05546	D	D	D
Heparin cofactor 2/SERPIND1 protein	420	U	N	ALRALGVTALFDKHSNTTGITGQRIVIDLFK	124.38	3	392.195	-0.7654									A6QPP2	D	D	D
Hepatitis A virus cellular receptor 1 N-terminal domain containing protein	87	U	N	QKDRRYQLRGYIGERNLTLTIKNADPSDSGL	73.219	2	740.916	-0.12603									Q2KII3	D	D	D	Q2KII3	D	D
Hepatocyte growth factor-like protein	296	K	N	VSCFRGKGEGYRGTANTTTAGVPCQRWDAQI	83.729	2	718.838	0.74243	P26927	D	D	D	P26927		D	D
Hepatocyte growth factor-like protein	297	S	N	LNCFRGKGEGYRGTVNTTAAGVPCQRWDAQL	116.84	2	717.848	2.0923									Q24K22	D	D	D
Hereditary hemochromatosis protein	234	S	N	SVTTLRCRALNYYPQNITMKWLKDKQPMDAK	110.64	2	729.863	-0.35194	Q30201	D	D	D	Q30201	D	D	D
HHIP like 2	480	U	N	RAKEGFECYDKKLCQNASLDDILPIYAYGHA	139.11	3	807.738	-0.62639									E1BGX8	D	D	D
High affinity cationic amino acid transporter 1	226	K	N	KGSVKNWQLTEEDFGNTSGRLCLNNDTKEGK	154.6	2	878.887	0.40162	P30825	D	D	D
High affinity cationic amino acid transporter 1	235	S	N	TEEDFGNTSGRLCLNNDTKEGKPGVGGFMPF	140.09	2	490.734	-0.23911	P30825	D	D	D	P30825	D	D	D
High affinity immunoglobulin gamma Fc receptor I	78	K	N	TQTSTPSYRITSASVNDSGEYRCQRGLSGRS	98.531	2	701.323	-0.20507	P12314	D	D	D	P12314	D		D
Histidine-rich glycoprotein	344	K	N	HATFGTNGAQRHSHNNNSSDLHPHKHHSHEQ	96.464	4	407.437	0.66629	P04196	D			P04196		D	D
Histidine-rich glycoprotein	125	K	N	TRHSHESQDLRVIDFNCTTSSVSSALANTKD	125.51	2	1009.49	0.43848					P04196	D	D	D
Histidine-rich glycoprotein	95	U	N	DCPVLSRKHWDDCELNVSRRPSETVIGQCKV	96.591	2	781.351	-0.42027									Q9BGU1	D	D	D	Q9BGU1		D	D
HLA class I histocompatibility antigen, A-2 alpha chain	110	K	N	SQTHRVDLGTLRGYYNQSEAGSHTVQRMYGC	178.07	3	567.257	0.0069614	P01892	D	D	D	P01892	D	D	D
HLA class I histocompatibility antigen, B-13 alpha chain	110	By similarity	N	TQTYRENLRTALRYYNQSEAGSHTWQTMYGC	96.303	3	966.066	-1.3604	P30461	D	D	D	P30461	D		D
HLA class I histocompatibility antigen, B-47 alpha chain	110	By similarity	N	TQTYREDLRTLLRYYNQSEAGSHTLQRMFGC	215.34	2	828.879	-0.50475	P30485	D	D		P30485	D	D	D
HLA class I histocompatibility antigen, B-54 alpha chain	110	By similarity	N	AQTDRESLRNLRGYYNQSEAGSHTWQTMYGC	112.88	3	985.073	-0.69596					P30492	D	D
HLA class I histocompatibility antigen, B-7 alpha chain	110	K	N	AQTDRESLRNLRGYYNQSEAGSHTLQSMYGC	117.82	3	956.729	-0.19342					P01889	D	D	D
HLA class I histocompatibility antigen, Cw-2 alpha chain	110	K	N	AQTDRVNLRKLRGYYNQSEAGSHTLQRMYGC	185.87	2	857.389	-0.29026	P30501	D	D	D	P30501	D	D	D
HLA class I histocompatibility antigen, Cw-4 alpha chain	110	By similarity	N	AQADRVNLRKLRGYYNQSEDGSHTLQRMFGC	265.95	2	879.384	-0.7849	P30504	D	D	D	P30504	D	D	D
HLA class II histocompatibility antigen gamma chain	136	K	N	GALPQGPMQNATKYGNMTEDHVMHLLQNADP	172	4	587.025	-0.55923	P04233	D	D	D	P04233	D	D	D
HLA class II histocompatibility antigen gamma chain	270	U	N	PNGTEVPNTRSRGHHNCSESLELEDPSSGLG	133.95	2	1178.53	1.6914	P04233	D	D	D	P04233	D	D	D
HLA class II histocompatibility antigen, DP alpha 1 chain	109	S	N	IAILNNNLNTLIQRSNHTQATNDPPEVTVFP	238.94	2	992.978	-0.21201	P20036	D	D	D	P20036	D	D	D
HLA class II histocompatibility antigen, DQ alpha 1 chain	103	K	N	IAVLKHNLNIVIKRSNSTAATNEVPEVTVFS	117.55	2	942.46	-1.1529	P01909	D	D
HLA class II histocompatibility antigen, DQ beta 1 chain	51	S	N	PEDFVYQFKAMCYFTNGTERVRYVTRYIYNR	73.781	2	676.778	-0.12179	P01920	D	D	D
HLA class II histocompatibility antigen, DQ beta 2 chain	51	S	N	PEDFVYQFKGMCYFTNGTERVRLVSRSIYNR	107.06	2	677.768	0.37354	P05538	D	D	D	P05538		D	D
HLA class II histocompatibility antigen, DR alpha chain	103	K	N	IAVDKANLEIMTKRSNYTPITNVPPEVTVLT	183.15	2	1322.19	0.48236	P01903	D	D	D	P01903	D	D	D
HLA class II histocompatibility antigen, DR alpha chain	143	K	N	NVLICFIDKFTPPVVNVTWLRNGKPVTTGVS	161.93	3	477.934	0.37383	P01903	D	D	D
HLA class II histocompatibility antigen, DR beta 4 chain	48	S	N	_____EQAKCECHFLNGTERVWNLIRYIYNQ	151.1	2	713.292	-0.64415	P13762	D	D	D	P13762	D	D	D
HLA class II histocompatibility antigen, DR beta 5 chain	48	K	N	RPRFLQQDKYECHFFNGTERVRFLHRDIYNQ	271.31	2	731.801	-1.1461	Q30154	D	D	D	Q30154	D	D	D
HLA class II histocompatibility antigen, DRB1-16 beta chain	48;48	S;U	N	__RFLWQPKRECHFFNGTERVRFLDRYFYNQ;RPRFLWQPKRECHFFNGTERVRFLDRYFYNQ	215.06	3	485.882	-0.40676	Q29974	D	D	D	Q29974	D	D	D
HLA class II histocompatibility antigen, DRB1-3 chain	48	K	N	RPRFLEYSTSECHFFNGTERVRFLERYFHNQ	243.13	3	709.639	-0.083064	P01912	D	D	D	P01912	D	D	D
HLA class II histocompatibility antigen, DRB1-4 beta chain	48	S	N	RPRFLEQVKHECHFFNGTERVRFLDRYFYHQ	180.24	2	718.799	0.038845	P13760	D	D	D	P13760	D	D	D
HLA class II histocompatibility antigen, DRB1-7 beta chain	48	S	N	QPRFLWQGKYKCHFFNGTERVQFLERLFYNQ	83.168	3	390.834	-0.34411	P13761	D	D	D	P13761	D	D	D
HLA class II histocompatibility antigen, DRB1-8 beta chain	48	S	N	RPRFLEYSTGECYFFNGTERVRFLDRYFYNQ	180.7	2	1061.95	0.062991					Q30134	D	D	D
HLA class II histocompatibility antigen, DRB1-9 beta chain	48	S	N	QPRFLKQDKFECHFFNGTERVRYLHRGIYNQ	284.68	2	909.394	0.71186	Q9TQE0	D	D	D	Q9TQE0	D	D	D
HLA-C protein	110	U	N	AQTDRVSLRNLRGYYNQSEARSHIIQRMYGC	55.461	2	545.738	0.053416	Q96QL3		D	D
HLA-D8.2V protein	3	U	N	__RFLEYSTSECRFFNGTERVRFLERYFHNQ	120.65	1	873.399	0.055209	Q29799	D	D	D	Q29799	D	D	D
HLA-DPA1 protein	109	U	N	IAILNNNLNTLIQRSNHTQAANDPPEVTVFP	232.54	2	977.973	0.476	Q95HB9	D	D	D	Q95HB9	D	D	D
HLA-DQA1 protein	104	U	N	MAVAKHNLNIMIKRYNSTAATNEVPEVTVFS	111.65	2	980.475	0.68579	A0A0C7DW92	D	D	D
HLA-DRB1 antigen	4	U	N	____________HFFNGTERVQFLDRYFHNQ	115.49	2	505.732	0.46012	P79499	D	D	D
HLA-DRB1 protein	48	U	N	________KYECHFFNGTERVRFLHRDIYNQ	126.63	2	731.801	-1.1461	Q30109	D	D	D	Q30109	D	D	D
HP47 protein	21	U	N	QVAGRSGDKIFIGNVNNSGLKINLFDTPLET	261.03	1	1278.69	-2.7302	P78328	D	D	D	P78328	D
Hypoxia up-regulated protein 1	515	K	N	LGFLGPEDLRVFGSQNLTTVKLKGVGDSFKK;LGFLGPEDLRVFGSQNLTTVKLKGVGESFKK	128.01	2	598.824	0.65503	Q9Y4L1	D	D	D	Q9Y4L1	D	D	D	E1B748	D	D	D	E1B748		D	D
Hypoxia up-regulated protein 1	830	K	N	RKKWPERLSALDNLLNHSSMFLKGARLIPEM	272.16	2	911.469	0.61382	Q9Y4L1	D	D	D	Q9Y4L1	D	D	D	E1B748	D	D	D
Hypoxia up-regulated protein 1	596	K	N	ISSLFGGGTTPDAKENGTDTVQEEEESPAEG	148.26	2	1019.93	-0.15099	Q9Y4L1	D	D	D	Q9Y4L1	D	D	D
Hypoxia up-regulated protein 1	869	K	N	MTTLEKVINETWAWKNATLAEQAKLPATEKP	94.692	2	474.748	0.1886	Q9Y4L1	D	D	D	Q9Y4L1	D	D	D
Hypoxia up-regulated protein 1	931	K	N	PRPKDKNGTRAEPPLNASASDQGEKVIPPAG	154.47	2	758.854	0.38886	Q9Y4L1	D	D	D	Q9Y4L1	D	D	D
Hypoxia up-regulated protein 1	862	K	N	QIFTEVEMTTLEKVINETWAWKNATLAEQAK	175.51	2	575.295	0.4221	Q9Y4L1	D	D	D	Q9Y4L1	D	D	D
Hypoxia up-regulated protein 1	869	U	N	MTTLEKIINETWAWKNTTVAEQAKLPATEKP	76.572	2	482.745	0.59655									E1B748		D	D
Hypoxia up-regulated protein 1	931	U	N	PRPRDKNGTRAEAPLNASTSDQSEKVIPPPG	131.56	2	775.857	0.16987									E1B748	D	D	D	E1B748		D	D
Ig delta chain C region	367	K	N	TYTCVVSHEDSRTLLNASRSLEVSCESPPGP	134.06	2	389.221	-0.21664					P01880	D	D	D
Ig gamma-1 chain C region	180	K	N	VEVHNAKTKPREEQYNSTYRVVSVLTVLHQD	193.1	3	558.937	0.67977	P01857	D	D	D	P01857	D	D	D
Ig gamma-2 chain C region	176	U	N	VEVHNAKTKPREEQFNSTFRVVSVLTVLHQD	129.38	2	580.759	0.15072	P01859	D	D	D
Ig gamma-3 chain C region	227	K	N	VEVHNAKTKPREEQYNSTFRVVSVLTVLHQD	118.33	2	588.756	0.43954	P01860	D	D	D	P01860	D		D
Ig heavy chain variable region	73	U	N	DGRDKYYADSVKGRFNISRDNYKNTLYLQVN	133.6	2	426.732	0.077131	A0A068LL52	D	D	D	A0A068LL52	D	D	D
Immunoglobulin heavy constant alpha 1	144	S	N	LHRPALEDLLLGSEANLTCTLTGLRDASGVT	298.81	2	1180.62	-0.72844	P01876	D	D	D	P01876	D	D	D
Immunoglobulin heavy constant alpha 1	340	K	N	TQKTIDRLAGKPTHVNVSVVMAEVDGTCY__	194.18	2	998.947	-0.76492	P01876	D	D	D	P01876	D	D	D
Immunoglobulin heavy constant alpha 2	47	K	N	FPQEPLSVTWSESGQNVTARNFPPSQDASGD	104.87	3	1593.79	0.3091	P01877	D	D	D	P01877	D	D	D
Immunoglobulin heavy constant alpha 2	205	K	N	TCTAAHPELKTPLTANITKSGNTFRPEVHLL	174.41	2	481.276	0.87674	P01877	D	D	D	P01877	D	D	D
Immunoglobulin heavy constant mu	279	K	N	GEAVKTHTNISESHPNATFSAVGEASICEDD	126.18	4	881.878	-1.0903	P01871		D	D
Immunoglobulin heavy constant mu	272	K	N	ISWTRQNGEAVKTHTNISESHPNATFSAVGE	126.18	4	881.878	-1.0903	P01871		D	D
Immunoglobulin heavy constant mu	209	K	N	MFTCRVDHRGLTFQQNASSMCVPDQDTAIRV	294.52	3	781.359	-0.33133	P01871	D	D	D	P01871	D	D	D
Immunoglobulin heavy constant mu	46	K	N	QDFLPDSITFSWKYKNNSDISSTRGFPSVLR	202.65	2	644.307	0.26372	P01871	D	D	D	P01871	D	D	D
Immunoglobulin heavy constant mu	439	U	N	TERTVDKSTGKPTLYNVSLVMSDTAGTCY__	227.25	2	1192.55	-0.057081	P01871	D	D	D	P01871	D	D	D
Immunoglobulin J chain	67	U	N	NEDIVERNIRIIVPLNNRENISDPTSPLRTR	141	3	718.723	0.50209	P01591		D	D	P01591	D	D	D
Immunoglobulin J chain	112	U	N	TEVELDNQIVTATQSNICDEDSATETCYTYD	110.59	3	1415.6	2.4819	P01591		D	D	P01591		D	D
Immunoglobulin J chain	71	K	N	VERNIRIIVPLNNRENISDPTSPLRTRFVYH	223.35	2	616.306	0.49353	P01591	D	D	D	P01591	D	D	D
Immunoglobulin J chain	112	U	N	TEVELEDQVVTASQSNICDSDAETCYTYDRN	108.99	3	1335.89	3.8265									Q3SYR8	D		D
Immunoglobulin J chain	71	U	N	VERNVRIIVPLNSRENISDPTSPMRTKFVYH	160.67	2	625.284	-0.023839									Q3SYR8	D	D	D	Q3SYR8	D		D
Immunoglobulin superfamily member 8	463	K	N	AGGTVYRGETASLLCNISVRGGPPGLRLAAS	107.14	2	711.861	0.067914					Q969P0	D	D	D
Inactive N-acetylated-alpha-linked acidic dipeptidase-like protein 2	534	S	N	KNVVAYISLHSPIRGNSSLYPVASPSLQQLV	58.914	2	1060.06	-1.0403					Q58DX5		D	D
Inactive tyrosine-protein kinase 7	116;116	K;U	N	CVARDDVTGEEARSANASFNIKWIEAGPVVL	105.36	2	477.742	0.076782					Q13308	D	D		F1MWK8	D	D	D
Inactive tyrosine-protein kinase 7	283	K	N	NRSRPPHLRRATVFANGSLLLTQVRPRNAGI	65.105	3	616.019	-0.95598	Q13308	D	D
Inactive tyrosine-protein kinase 7	175	K	N	YQWFRDGTPLSDGQSNHTVSSKERNLTLRPA	171.78	2	866.897	0.172	Q13308	D	D	D	Q13308	D	D	D
Inactive tyrosine-protein kinase 7	175	U	N	YQWFRDGSALSDGQSNHTVSSKERNLTLRPA	211.78	2	846.881	-0.015717									F1MWK8	D	D	D
Inactive tyrosine-protein kinase transmembrane receptor ROR1	315	S	N	GIPMADPINKNHKCYNSTGVDYRGTVSVTKS	70.412	2	619.256	1.1131	Q01973	D	D	D	Q01973	D		D
Inositol 1,4,5-trisphosphate receptor type 1	2512	K	N	SEFLFSDVCRVESGENCSSPAPREELVPAEE	98.531	2	696.801	-0.70455	Q14643	D	D	D	Q14643	D	D	D
Inositol monophosphatase 3	259	K	N	SHSGMVKQVALQTFGNQTTIIPAGGAGYKVL	81.356	2	1119.59	0.54656	Q9NX62	D	D	D	Q9NX62	D	D	D
Insulin receptor	445;445	K;U	N	LDNQNLRQLWDWSKHNLTITQGKLFFHYNPK	160.53	2	507.777	0.0088231	P06213	D		D	P06213	D	D	D
Insulin receptor	920	K	N	FALERGCRLRGLSPGNYSVRIRATSLAGNGS	136.63	2	526.766	0.29713	P06213	D		D	P06213	D		D
Insulin-like growth factor-binding protein 3	116	K	N	ARPLQALLDGRGLCVNASAVSRLRAYLLPAP	137.89	2	568.784	0.37937	P17936	D	D	D	P17936	D	D	D
Integrin alpha-1	460	K	N	ASSGDVLYIAGQPRYNHTGQVIIYRMEDGNI	110.08	2	683.854	-0.12785					P56199	D	D
Integrin alpha-6	997	K	N	GLDSKASLILRSRLWNSTFLEEYSKLNYLDI	126.1	2	760.364	-0.12032	P23229	D	D	D
Integrin alpha-6	930	S	N	LEKVTCEPQKEINSLNLTESHNSRKKREITE	153.7	2	808.892	-0.77801	P23229	D	D	D	P23229	D	D	D
Integrin alpha-6	770	S	N	LRAFPEKQLSCVANQNGSQADCELGNPFKRN	122.77	3	866.064	-0.64	P23229	D	D	D	P23229			D
Integrin alpha-6	966	S	N	NRKFSLFAERKYQTLNCSVNVNCVNIRCPLR	188.25	2	978.961	-0.087969	P23229	D	D	D	P23229	D	D	D
Integrin alpha-6	323	K	N	VSKDEITFVSGAPRANHSGAVVLLKRDMKSA	158.04	3	371.217	0.76542	P23229	D	D	D	P23229	D	D	D
Integrin alpha-L	862	S	N	ELPEESRLLSRALSCNVSSPIFKAGHSVALQ	72.089	2	663.336	0.36297	P20701	D	D	D
Integrin alpha-L	33	S	N	FAPAWSYNLDVRHVQNFSFPLAGRHFGYRVL	114.86	3	459.238	0.2482									P61625	D	D	D
Integrin alpha-M	391	S	N	GGVFLYTSKEKSTFINMTRVDSDMNDAYLGY	122.19	2	494.736	-0.33614	P11215	D	D	D
Integrin alpha-M	978	S	N	RSLPISLVFLVPVRLNQTVIWDRPQVTFSEN	65.213	4	741.866	1.1637	P11215	D	D
Integrin alpha-M	946	K	N	SHGVSTKYLNFTASENTSRVMQHQYQVSNLG	111.79	2	704.822	-0.13463	P11215	D	D	D
Integrin alpha-M	1021	S	N	SHSDFLAELRKAPVVNCSIAVCQRIQCDIPF	184.31	2	802.91	-0.33665	P11215	D	D	D
Integrin alpha-M	900	K	N	VDSKASLGNKLLLKANVTSENNMPRTNKTEF	124.67	2	618.282	0.38201	P11215	D	D	D	P11215	D	D
Integrin alpha-M	940	K	N	VYMVVTSHGVSTKYLNFTASENTSRVMQHQY	111.79	2	704.822	-0.13463	P11215	D	D	D
Integrin alpha-M	696	U	N	DPGRPHSVAIFDETQNSTRRRVETLRLSQKC	143.23	4	952.71	1.3714									Q24LN2		D	D
Integrin alpha-M	801	U	N	FMDLDTLVVGGPRDLNVTVTVRNEGEDSYRT	74.162	2	510.285	0.12133									Q24LN2		D	D
Integrin alpha-M	58	U	N	GSRLVVGAPQEVKAANQTGGLYHCDYSTGRC	249.16	3	625.272	-0.35058									Q24LN2	D	D	D	Q24LN2	D	D	D
Integrin alpha-M	734	U	N	LDCVEDSVTPIALRLNFSLVGEPAHNYGGLR	208.65	3	927.836	0.67518									Q24LN2	D	D	D
Integrin alpha-M	1050	U	N	PSFGIQEEFKVTLKSNFSFDWYIKTSHNHLQ	85.958	2	655.303	-0.37396													Q24LN2		D	D
Integrin alpha-M	1021	U	N	RHSDFLAELKKSPVLNCSVAVCQRIQCAIPS	239.19	2	746.86	-4.1099									Q24LN2	D	D	D	Q24LN2		D	D
Integrin alpha-M	999	U	N	SQPQVTFSQDVSSGCNTTEVAPRHSDFLAEL	165.47	3	993.806	-0.085377									Q24LN2	D	D	D
Integrin alpha-V	945;945	S;S	N	KSLLWTETFMNKENQNHSYSLKSSASFNVIE;RSLLWTETFMNKENQNHSYSLKSSASFNVIE	112.64	2	611.783	-0.25134	P06756	D	D	D	P06756	D	D	D	P80746	D	D
Integrin alpha-V	74;74	K;S	N	SASSRMFLLVGAPKANTTQPGIVEGGQVLKC	62.055	2	807.933	1.412	P06756	D	D	D	P06756	D	D	D	P80746	D	D	D
Integrin alpha-V	874	K	N	NPLRIKISSLQTTEKNDTVAGQGERDHLITK	154.12	2	1019	-0.11069	P06756	D	D	D	P06756			D
Integrin alpha-V	874	S	N	NPLRIKISNSQTSEKNDTVGGQGDRNHLITK	155.93	3	665.975	0.024908									P80746	D	D	D
Integrin alpha-X	899	K	N	VSPKAVLGDRLLLTANVSSENNTPRTSKTTF	130.66	2	816.428	-0.35764	P20702	D	D	D
Integrin alpha-X	939	S	N	VYTVVSSHEQFTKYLNFSESEEKESHVAMHR	83.397	2	624.779	-0.20141	P20702	D	D	D
Integrin beta-1	520	S	N	DEVNSEDMDAYCRKENSSEICSNNGECVCGQ	119.27	3	884.015	-0.99801	P05556		D	D	P05556	D	D	D
Integrin beta-1	481	K	N	CQSEGIPESPKCHEGNGTFECGACRCNEGRV	153.7	2	829.306	-0.53719	P05556	D	D	D	P05556	D
Integrin beta-1	669	K	N	KGEKKDTCTQECSYFNITKVESRDKLPQPVQ	181.81	3	633.278	-0.48599	P05556	D	D	D	P05556	D	D	D
Integrin beta-1	212	K	N	STTPAKLRNPCTSEQNCTSPFSYKNVLSLTN	153.95	2	961.893	0.1093	P05556	D	D	D	P05556	D	D	D
Integrin beta-1	481	S	N	CQGEGIPGSPKCHDGNGTFECGACRCNEGRV	132.86	2	822.298	0.3485									P53712		D	D
Integrin beta-1	212	S	N	STTPAKLRNPCTNEQNCTSPFSYKNVLSLTD	264.3	2	975.398	-0.39292									P53712	D	D	D
Integrin beta-2	213	K atypical	N	CQPPFAFRHVLKLTNNSNQFQTEVGKQLISG	116.51	2	791.883	0.39501	P05107		D	D
Integrin beta-2	50	K	N	ECIESGPGCTWCQKLNFTGPGDPDSIRCDTR	155.08	2	696.338	0.31463	P05107	D	D	D
Integrin beta-2	212	K	N	ECQPPFAFRHVLKLTNNSNQFQTEVGKQLIS	124.45	2	791.883	0.58108	P05107	D	D	D	P05107		D	D
Integrin beta-2	501	S	N	QGRSSQELEGSCRKDNNSIICSGLGDCVCGQ	127.66	4	814.353	-0.11732	P05107	D	D	D
Integrin beta-2	642	S	N	SCAECLKFEKGPFGKNCSAACPGLQLSNNPV	144.33	2	916.929	0.046137	P05107	D	D	D
Integrin beta-2	50	S	N	DCIESGPGCAWCQKLNFTGQGEPDSIRCDTR	213.18	2	718.849	0.52792									P32592	D	D	D	P32592	D		D
Integrin beta-2	501	S	N	QGRSSQELEGSCRKDNSSIICSGLGDCICGQ	152.53	4	853.879	-0.58242									P32592	D	D	D	P32592	D		D
Inter-alpha-trypsin inhibitor heavy chain H4	646	U	N	GDRTSRKPGGGLKLLNGTPLFGPPGPPAAAS	142.31	3	739.728	0.51978									Q3T052	D	D	D
Inter-alpha-trypsin inhibitor heavy chain H4	208	S	N	TFMTNKLAEALTTSQNKTKAHVRFKPTLSQQ	90.653	2	589.811	-0.68449									Q3T052	D	D	D	Q3T052		D	D
Intercellular adhesion molecule 1	267	K	N	LALGDQRLNPTVTYGNDSFSAKASVSVTAED	103.39	2	808.888	0.33453	P05362	D	D	D	P05362	D	D	D
Intercellular adhesion molecule 1	145	K	N	NLTLRCQVEGGAPRANLTVVLLRGEKELKRE	140.75	2	501.316	0.10703	P05362	D	D	D
Intercellular adhesion molecule 1	357	S	N	GTSAVPPGPRAQLKLNASASDHRSNFSCSAA	138.66	2	487.233	0.46321									Q95132	D	D	D
Intercellular adhesion molecule 1	47	S	N	HPSKAIIPRGDSLTVNCSNSCDQKSTFGLET	109.83	2	844.343	-0.77423									Q95132	D		D
Intercellular adhesion molecule 2	153	K	N	TVEPLDSLTLFLFRGNETLHYETFGKAAPAP	172.57	2	699.825	0.70093	P13598	D	D	D	P13598	D	D	D
Intercellular adhesion molecule 3	295	K	N	ATARADQEGAREIVCNVTLGGERREARENLT	93.623	2	675.334	0.8072	P32942	D	D	D
Intercellular adhesion molecule 3	296	S	N	ATAKTEQEGTQEIVCNVTLGVENRETRESLV	152.51	2	1140.04	0.44515									Q28125	D	D	D
Intercellular adhesion molecule 3	138	S	N	ELAPLPLWQPVGEELNLSCLVSGGAPRAHLS	187.38	3	1054.23	0.4727									Q28125	D	D	D
Intercellular adhesion molecule 3	89	S	N	EPHSRGLGWAAFRLTNVTGDMEILCSGICNK	209.25	2	1015.96	-0.0064302									Q28125	D		D
Intercellular adhesion molecule 3	54	S	N	EPKDPVVPFGEPLVVNCTLDCPGPGLISLET	62.393	3	1133.24	0.56453									Q28125	D		D
Intercellular adhesion molecule 3	190	S	N	KVTFMVQPRREDHGTNFSCRSELDLRSQGLE	143.22	3	461.198	2.0385									Q28125	D	D	D	Q28125	D	D
Intercellular adhesion molecule 3	112	S	N	LCSGICNKSQVVGFSNITVFGFPKRVELAPL	123.02	2	865.456	0.53459									Q28125	D	D	D	Q28125	D	D
Intercellular adhesion molecule 3	377	S	N	QLKATEMDDRRTFFCNATLKVHGVTLHRNRS	89.886	2	552.768	0.046104									Q28125		D	D	Q28125	D	D
Intercellular adhesion molecule 3	209	S	N	RSELDLRSQGLELFQNTSAPRKLQTYAMPKT	183.96	2	775.888	0.097408									Q28125	D	D	D
Intercellular adhesion molecule 3	103	S	N	TNVTGDMEILCSGICNKSQVVGFSNITVFGF	209.25	2	1015.96	-0.0064302									Q28125	D		D
Interferon alpha/beta receptor 1	81	S	N	QKTGMDNWIKLSGCQNITSTKCNFSSLKLNV	116.74	2	606.295	-0.53066	P17181	D	D	D	P17181	D	D	D
Interferon gamma receptor 1	179	S	N	ETTCYIRVYNVYVRMNGSEIQYKILTQKEDD	93.598	2	536.747	0.62566	P15260	D	D	D	P15260	D	D	D
Interleukin-1 receptor type 1	193	S	N	KDRLIVMNVAEKHRGNYTCHASYTYLGKQYP	73.156	3	546.577	1.1322					P14778	D	D	D
Interleukin-1 receptor-like 2	184	S	N	KGERFTVLETRLLVSNVSAEDRGNYACQAIL	97.214	2	603.317	-0.072794	Q9HB29		D		Q9HB29	D	D
Interleukin-19	56	S	N	FQEIKRAIQAKDTFPNVTILSTLETLQIIKP	181.64	3	1074.57	0.54934	Q9UHD0	D			Q9UHD0	D	D	D
Interleukin-19	135	S	N	QCQEQRQCHCRQEATNATRVIHDNYDQLEVH	156.01	2	447.214	-0.45484	Q9UHD0	D	D	D	Q9UHD0	D	D	D
Interleukin-6 receptor subunit beta/Interleukin 6 signal transducer	390;390	K;U	N	SHLQNYTVNATKLTVNLTNDRYLATLTVRNL;SHSQNYTVKDTKLTVNLTNDRYVATLTARNL	171.56	2	524.78	-0.3026	P40189	D	D	D	P40189	D	D	D	E1BD36			D
Interleukin-6 receptor subunit beta/Interleukin 6 signal transducer	157	K	N	MRCEWDGGRETHLETNFTLKSEWATHKFADC	203.51	2	668.337	0.8936	P40189	D	D	D	P40189	D	D	D
Interleukin-6 receptor subunit beta/Interleukin 6 signal transducer	83	U	N	KTGRVPVPYEQYSVINRTASSVTFPNITLIN	101.6	2	783.906	1.2414									E1BD36		D	D
Interleukin-7 receptor subunit alpha	151	K	N	SVIYREGANDFVVTFNTSHLQKKYVKVLMHD	55.546	3	637.311	0.18573	P16871	D		D	P16871	D	D
Interleukin-7 receptor subunit alpha	182	S	N	VAYRQEKDENKWTHVNLSSTKLTLLQRKLQP	94.487	2	588.301	1.5074	P16871		D	D	P16871	D	D	D
Junctional adhesion molecule A	184	S	N	GVEMPLEPKSNRAFSNSSYTLNQKTGELIFD	119.76	2	681.825	0.084414									Q9XT56	D	D	D	Q9XT56		D	D
Kallikrein-5	173	S	N	KLNRRIRPTKDVRPINVSSHCPSAGTKCLVS	141.18	3	609.968	-0.24206	Q9Y337	D	D	D	Q9Y337	D	D	D
Kallikrein-5	208	K	N	TKSPQVHFPKVLQCLNISVLSQKRCEDAYPR	106.17	2	752.918	0.019425	Q9Y337	D		D	Q9Y337	D	D	D
Kallikrein-6	134	S	N	SELIQPLPLERDCSANTTSCHILGWGKTADG	104.94	2	905.393	0.91531					Q92876	D	D	D
Kallistatin	157	K	N	ALFLSHNLKFLAKFLNDTMAVYEAKLFHTNF	102.97	2	710.831	-0.28181					P29622	D	D	D
Kininogen-1	294	K	N	EETLTHTITKLNAENNATFYFKIDNVKKARV	138.75	2	719.337	0.92167					P01042		D	D
Kininogen-1	205	K	N	VAGLNFRITYSIVQTNCSKENFLFLTPDCKS	146.36	2	708.85	0.5197	P01042		D	D	P01042	D		D
Kininogen-1	169	K	N	DLEPVLRYAIQYFNNNTSHSHLFDLKEVKRA	136.35	3	773.367	0.49499									P01044	D	D		P01044		D	D
Kininogen-1	168	K	N	PDLEPVLRYAIQYFNNNTSHSHLFDLKEVKR	177.56	3	773.367	0.49499									P01044	D	D	D	P01044		D	D
Kininogen-1	87	K	N	SLKYQIKEGDCPFQSNKTWQDCDYKDSAQAA	72.2	2	592.742	-0.61343									P01044	D	D	D	P01044			D
Kininogen-2	280	K	N	PKPIPVDSPDLEEALNHSIAKLNAEHDGTFY	114.4	3	683.353	0.17613									P01045	D	D	D
Kunitz-type protease inhibitor 2	94	S	N	LTKEECLKKCATVTENATGDLATSRNAADSS	139.6	2	835.383	-0.33817					O43291	D	D	D
Lactadherin	325	K	N	FGSVQFVASYKVAYSNDSANWTEYQDPRTGS	208.43	3	674.621	1.431	Q08431	D	D	D	Q08431	D	D	D
Lactadherin	228	K	N	HTACTLRFELLGCELNGCANPLGLKNNSIPD	154.82	3	669.997	-0.58841	Q08431	D	D	D	Q08431	D	D	D
Lactadherin	238	K	N	LGCELNGCANPLGLKNNSIPDKQITASSSYK	200.54	2	397.189	-0.37159	Q08431	D	D	D	Q08431	D	D	D
Lactadherin	329	K	N	QFVASYKVAYSNDSANWTEYQDPRTGSSKIF	130.21	3	674.621	1.431	Q08431	D	D	D	Q08431	D	D	D
Lactadherin	64	U	N	VFPSYTCTCLKGYAGNHCETKCVEPLGLENG	164.64	3	380.494	0.056427	Q08431	D	D	D	Q08431	D	D	D
Lactadherin	227	K	N	QVAGRSGDKIFIGNVNNSGLKINLFDTPLET	261.03	1	1278.69	-2.7172									Q95114	D	D	D	Q95114	D	D	D
Lactadherin	390	U	N	DPGASESKIFPGNMDNNSHKKNIFETPFQAR	122.18	3	459.543	0.59574													Q95114	D	D
Lactadherin	268	U	N	HRGCTLRFELLGCELNGCTEPLGLKDNTIPN	145.62	2	1027	2.0643													Q95114		D	D
Lactoperoxidase	358;358	K	N	YLPFNNKKPSPCEFINTTARVPCFLAGDFRA;YLPYDSKKPSPCEFINTTARVPCFLAGDSRA	132.81	2	762.374	0.10058	P22079	D	D	D	P22079	D	D	D	P80025	D	D	D
Lactoperoxidase	212	K	N	NKIVGYLNEEGVLDQNRSLLFMQWGQIVDHD	169.04	2	861.433	0.82251	P22079	D	D		P22079	D	D	D
Lactoperoxidase	212	K	N	NKIVGYLDEEGVLDQNRSLLFMQWGQIVDHD	116.79	2	861.925	3.0531													P80025	D	D
Lactotransferrin	521	U	N	EYFSQSCAPGSDPRSNLCALCIGDEQGENKC	176.04	2	905.895	1.197	P02788	D	D	D	P02788	D	D	D
Lactotransferrin	198	U	N	GQFPNLCRLCAGTGENKCAFSSQEPYFSYSG	80.231	2	476.718	-0.021747	P02788		D	D
Lactotransferrin	642	K	N	RLKQVLLHQQAKFGRNGSDCPDKFCLFQSET	136.34	3	679.292	-0.041091	P02788	D		D	P02788	D
Lactotransferrin	534	U	N	RSNLCALCIGDEQGENKCVPNSNERYYGYTG	170.47	2	905.895	0.67213	P02788	D		D	P02788	D		D
Lactotransferrin	156	K	N	TAGWNVPIGTLRPFLNWTGPPEPIEAAVARF	255.63	3	1078.57	-0.38279	P02788	D	D	D	P02788	D	D	D
Lactotransferrin	497	K	N	VDRTAGWNIPMGLLFNQTGSCKFDEYFSQSC	214.46	2	1049.5	-0.52295	P02788	D	D	D	P02788	D	D	D
Lactotransferrin	387	U	N	EEQKKCQQWSQQSGQNVTCATASTTDDCIVL	233.45	3	1101.17	0.57257									P24627	D	D	D
Lactotransferrin	564	S	N	FRCLAEDVGDVAFVKNDTVWENTNGESTADW	367.7	2	1020.94	0.12257									P24627	D	D	D	P24627	D	D	D
Lactotransferrin	572	U	N	GDVAFVKNDTVWENTNGESTADWAKNLNRED	173.87	3	1150.84	1.8866													P24627	D		D
Lactotransferrin	252	S	N	LPEKADRDQYELLCLNNSRAPVDAFKECHLA	317.07	2	765.847	-0.81224									P24627	D	D	D	P24627		D	D
Lactotransferrin	198	U	N	QAYPNLCQLCKGEGENQCACSSREPYFGYSG	118.87	2	679.253	-0.81915									P24627	D		D	P24627		D	D
Lactotransferrin	495	S	N	VDRTAGWNIPMGLIVNQTGSCAFDEFFSQSC	121.86	3	1259.57	-0.36453									P24627	D	D	D
Laminin subunit alpha 1	510	U	N	RSQEDALGGRHQISINNSAVEQRLTSQYYWA	64.104	3	500.255	0.077276									F1MEG3	D	D	D
Laminin subunit alpha 1	1993	U	N	TSTLKNVMGLSQKLLNTSTDLSRVNATLQET	97.456	2	561.798	1.0739									F1MEG3		D	D
Laminin subunit alpha 2	1991	U	N	LRALNDTLDKLAAIPNDTAAKLQAVKDKARQ	75.695	2	544.298	-0.60334									F1MMT2	D	D	D
Laminin subunit alpha 2	52	U	N	PGQPVRNPQCRICNQNSSNPYQRHPITNAID	93.623	2	742.328	-0.060201									F1MMT2	D	D	D
Laminin subunit alpha 5	2157	U	N	AGALLPAIREQLSGINASSVAWARLHRLNAS	105.46	2	796.402	0.46797									F1MC13	D	D
Laminin subunit alpha 5	2264	U	N	ALSELESQTDRLAPANASVPSGEQLRRVLAE	70.98	2	756.899	0.47369									F1MC13	D	D
Laminin subunit alpha-3	2751	U	N	GCMKNLKKTSGVVRLNDTVGVTKKCSEDWKL	74.533	2	475.258	-0.05519					Q16787	D	D
Laminin subunit alpha-3	3097	U	N	LVVDGLRAREGSLPGNSTISIRAPVYLGSPP	58.487	2	667.346	0.063955	Q16787	D		D	Q16787	D	D	D
Laminin subunit alpha-3	2265	U	N	QTLNIVTVQKEVIDTNLTTLRDGLHGIQRGD	113.63	2	639.345	0.12105					Q16787	D	D	D
Laminin subunit alpha-4	810;810	K;U	N	LLDQLRTVEQKRPASNVSASIQRIRELIAQT	102.62	3	430.233	0.31188	Q16363	D	D	D	Q16363	D	D	D	F1MYX9	D	D	D
Laminin subunit alpha-4	104	S	N	NECLDGSGLCVHCQRNTTGEHCEKCLDGYIG	82.287	2	539.721	0.18442	Q16363	D		D
Laminin subunit beta-1	1279	K	N	MAQVEVKLSDTTSQSNSTAKELDSLQTEAES	160.04	2	700.898	-0.88201	P07942	D	D	D
Laminin subunit beta-1	677	S	N	RYVVLPRPVCFEKGTNYTVRLELPQYTSSDS	104.45	2	407.203	0.29759	P07942	D	D	D
Laminin subunit gamma-1	1021	U	N	FVGNRCDQCEENYFYNRSWPGCQECPACYRL	236.37	2	850.814	-0.23418									F1MD77	D	D	D
Laminin subunit gamma-1	650	K	N	WRPALTPFEFQKLLNNLTSIKIRGTYSERSA;WRPTLTPFEFQKLLNNLTSIKIRGTYSERSA	99.653	2	509.805	-0.10158	P11047		D	D	P11047	D	D
Laminin subunit gamma-1	1205	S	N	HKQEADDIVRVAKTANDTSTEAYNLLLRTLA	120.7	2	842.917	0.12711	P11047		D	D	P11047	D	D
Laminin subunit gamma-1	1107	S	N	VKDVDQNLMDRLQRVNNTLSSQISRLQNIRN	122.55	2	611.32	0.062652	P11047	D	D	D	P11047	D	D	D
Laminin subunit gamma-1	1160	U	N	EIASRELEKAKVAIANVSVTQPESTGDPNNM	117.83	3	978.478	0.38633									F1MD77	D	D	D
Laminin subunit gamma-1	1204	U	N	HKQEADDIVRVAKTANDTSAEAYNLLLRTLA	230.97	2	827.912	0.59001									F1MD77	D	D	D
Laminin subunit gamma-1	1394	U	N	NKTAAEEALRRIPAINQTIIEANEKTREAQQ	235.88	2	856.975	-0.18863									F1MD77	D	D	D
Laminin subunit gamma-1	1222	U	N	SAEAYNLLLRTLAGENQTASEIEELNRKYEQ	283.68	2	939.452	0.14907									F1MD77	D	D	D
L-amino-acid oxidase	54	S	N	DPDYEQLLKVVTWGLNRTLKPQRVIVVGAGV	113.5	2	474.263	0.021746	Q96RQ9	D	D
L-amino-acid oxidase	134	S	N	SSHRILHKLCQGLGLNLTKFTQYDKNTWTEV	78.903	2	610.334	0.10933	Q96RQ9	D	D	D
Latent-transforming growth factor beta-binding protein 1	347	S	N	LRYVQDQVAAPFQLSNHTGRIKVVFTPSICK	155.79	2	1017.5	0.19116	Q14766	D	D	D	Q14766	D	D	D
Latent-transforming growth factor beta-binding protein 3	349	S	N	RGEVGADCPQGYKRLNSTHCQDINECAMPGV	91.401	3	760.983	-0.46379					Q9NS15	D		D
Latent-transforming growth factor beta-binding protein 4	352	S	N	VSAPDGPCPTGFERVNGSCEDVDECATGGRC	109.35	2	864.838	0.79857					Q8N2S1	D		D
LDL receptor related protein 2	2958	U	N	CDGEADCLDALDEHQNCTRRSCFGTEFVCNN	143.15	3	885.353	1.4717									F1N6H1	D	D
LDL receptor related protein 2	3653	U	N	DEPLQECLGPSYRCDNYTEFSCKTNYRCIPK	82.171	2	663.747	-0.11929									F1N6H1	D	D	D
LDL receptor related protein 2	1118	U	N	DTDNDCKDGSDEKSCNYTQTCSPTQFHCPDH	78.021	4	600.493	-0.27978									F1N6H1	D		D
LDL receptor related protein 2	3418	U	N	EKGNKYNGSDRVALLNVTHRPYDIRVYHPYR	121.28	2	835.467	0.34476									F1N6H1	D	D	D
LDL receptor related protein 2	1472	U	N	FWSDGTQGKIWSAFQNGTDKKLILDSGVSMT	147.26	2	699.351	0.1883									F1N6H1	D	D	D
LDL receptor related protein 2	2918	U	N	GDMSDEDERHNCKNRNCSSSEFACEVGVRPH	98.694	3	665.628	0.41399									F1N6H1		D	D
LDL receptor related protein 2	315	U	N	GGGMCYCPSGFIVNQNRTNNCVDFDDCQIWG	284.15	2	1052.45	-0.42828									F1N6H1	D	D	D
LDL receptor related protein 2	2802	U	N	NCPERTCHTGYVKCTNSTICIPRSFLCDGDN	74.944	2	612.784	-0.57658									F1N6H1	D	D	D
LDL receptor related protein 2	3286	U	N	NGRYRRKLAEHCVDANNTFCFENPRGLALHP	197.21	3	732.982	0.052307									F1N6H1	D	D	D
LDL receptor related protein 2	4300	U	N	NPWLTQVRVFHQRKYNHSVPNRCKDVCSHLC	121.73	3	373.193	0.12703									F1N6H1	D	D	D
LDL receptor related protein 2	3951	U	N	NTGKDRSCAENLCEHNCTQLREGGFICSCRP	217.37	2	947.89	-0.44481									F1N6H1	D	D	D
LDL receptor related protein 2	4041	U	N	PPLLLLPENVRIRKYNLSSLQFSEYLEDQER	115.34	2	1062.49	0.084511									F1N6H1	D	D	D
LDL receptor related protein 2	3537	U	N	PQRFCALGMFQCNDGNCTNSHSLCNLRQDCP	132.48	3	960.394	-0.40627									F1N6H1		D	D
LDL receptor related protein 2	1651	U	N	RATHEVMKANKWHGGNQSVVMTLHQPLGIVV	120.33	4	677.615	0.33068									F1N6H1		D	D
LDL receptor related protein 2	151	U	N	RCNGQVDCRDASDERNCTHRCTRTEFQCGSG	120.96	3	455.19	-0.36308									F1N6H1	D	D	D
LDL receptor related protein 2	1526	U	N	VAKLDGSHKTVLISENITNLGGLAVDPRATD	181.64	2	993.044	0.73601									F1N6H1	D		D
LDL receptor related protein 2	2197	U	N	YGQNPKIERSFLDCTNRTVLVSDITATPRGL	139.88	2	508.224	0.62108									F1N6H1	D	D	D
LDL receptor related protein 2	132	U	N	YPVCEQLTCADGACYNTSQRCNGQVDCRDAS	316.54	2	1198.5	-0.71359									F1N6H1	D	D	D
LDL receptor related protein 2	3228	U	N	YWLDIENKVIERMFVNTTNRETVLKYNLPGA	159.04	2	493.237	1.2659									F1N6H1	D	D	D
Lecithin-cholesterol acyltransferase	44	U	N	NVLFPPHTTPKAELSNHTRPVILVPGCLGNQ	71.091	3	310.822	0.48608									Q2KIW4	D	D
Left-right determination factor 2	158	S	N	ARVTVEWLRVRDDGSNRTSLIDSRLVSVHES	108.98	3	307.814	0.076068	O00292	D		D
Legumain	263;263	K;S	N	KETLHKQYHLVKSHTNTSHVMQYGNKTISTM	227.47	3	537.24	-0.98888	Q99538	D	D	D	Q99538	D	D	D	Q95M12	D	D
Legumain	272;272	K;S	N	LVKSHTNTSHVMQYGNKTISTMKVMQFQGMK	227.47	3	537.24	-0.98888	Q99538	D	D	D	Q99538	D	D	D	Q95M12	D	D
Legumain	167	S	N	GILVFPNEDLHVKDLNETIHYMYKHKMYRKM	158.4	2	715.331	0.64192	Q99538	D	D	D	Q99538	D	D	D
LEM domain-containing protein 2	311	U	N	KSKCIPVMEAQEYIANVTSSSSAKFEAALTW	86.546	3	763.361	-0.76178					Q8NC56		D	D
Leucine rich repeat containing 8 family, member A	76	U	N	KMICLPCKWVTKDSCNDSFRGWAAPGPEPPY	87.181	2	502.187	0.16084													Q08E42	D	D
Leucine rich repeat containing 8 family, member A	83	U	N	SFRGWAAPGPEPPYPNSTIGPTPDSGPTGIK	39.783	2	1382.67	-1.2096													Q08E42	D	D
Leucine-rich alpha-2-glycoprotein	325	K	N	LYRWLQAQKDKMFSQNDTRCAGPEAVKGQTL	125.31	2	501.216	-0.91155	P02750	D	D	D	P02750	D	D	D
Leucine-rich repeat-containing protein 25	56	S	N	TCLNFSGKILTQLPQNQSLRARSVQLLDLSA	155.02	2	707.401	0.17663									Q8MII8	D	D	D	Q8MII8	D		D
Leucocyte antigen DR52 beta 1 chain	14;14	U;U	N	__RFLELRKSECHFFNGTERVRYLDRYFHNQ	167.32	3	462.859	-0.49274	Q9UQT9	D	D	D	Q9UQT9	D	D	D
Leucyl-cystinyl aminopeptidase	682	K	N	KYQSVSLLDKKSGVINLTEEVLWVKVNINMN	108.71	2	795.437	1.5046	Q9UIQ6	D	D	D
Leucyl-cystinyl aminopeptidase	834	S	N	LRSALLEFACTHNLGNCSTTAMKLFDDWMAS	115.46	3	777.022	-1.0766	Q9UIQ6	D		D	Q9UIQ6	D	D	D
Leucyl-cystinyl aminopeptidase	184	K	N	PTAVVPLRYELSLHPNLTSMTFRGSVTISVQ	101.36	3	604.634	0.71211	Q9UIQ6	D	D
Leucyl-cystinyl aminopeptidase	448	K	N	WGLLTFREETLLYDSNTSSMADRKLVTKIIA	84.41	2	917.898	-0.82429	Q9UIQ6		D	D
Leucyl-cystinyl aminopeptidase	832	U	N	LRSVLLDFACAHRLENCSAAALKLFFDWMAS	80.706	2	540.268	0.36014									F1N1Q8	D	D	D	F1N1Q8	D	D
Leukocyte surface antigen CD47	111	K	N	ASLKMDKSDAVSHTGNYTCEVTELTREGETI	217.36	2	1071.98	-0.78215	Q08722	D	D	D	Q08722	D	D	D
Leukocyte surface antigen CD47	73	K	N	WKFKGRDIYTFDGALNKSTVPTDFSSAKIEV	226.9	3	491.58	0.026227	Q08722	D	D	D	Q08722	D	D	D
Leukocyte surface antigen CD47	109	S	N	GIASLKMAKSDAVLGNYTCEVTELSREGETI	188.58	3	639.631	-0.036483									Q9N0K1	D	D	D	Q9N0K1		D	D
Leukocyte surface antigen CD47	80	U	N	IFIFDGSQRMSKPSSNFSSAEIAPSELLRGI	274.23	3	603.303	-0.26378									Q9N0K1	D	D	D	Q9N0K1		D	D
Leukocyte surface antigen CD47	34	S	N	QLIFNAIKSVEYTLCNQTVVIPCFVNNVETK	154.95	2	1359.16	-0.071055									Q9N0K1	D	D	D
Leukocyte surface antigen CD47	50	S	N	QTVVIPCFVNNVETKNITELYVRWKFKGENI	116.25	2	505.774	0.54501									Q9N0K1	D	D	D	Q9N0K1	D	D	D
Leukocyte surface antigen CD53	129	S	N	VAKGLTDSIHRYHSDNSTKAAWDSIQSFLQC	82.452	3	318.806	0.4787	P19397		D	D
LIF receptor alpha	470	U	N	PGNFTKVKLLCQIEINKTNSEHELRNVTMRG	83.998	2	567.31	0.34284									E1BAT3	D			E1BAT3	D	D
Lipase	321	U	N	QAFDWGSSAKNYFHYNQSSPPLYNVKDMLVP	79.81	3	658.647	0.64236									A6H713	D		D
Lipase maturation factor 2	616	S	N	QFGLQEKSPPRTRSANSTLAQALHWTRSQLS	151.38	2	779.897	0.35637	Q9BU23	D	D	D	Q9BU23		D	D
Lipocalin 2	86	U	N	KMYSSNYELKEDGSYNVTSILLKDDLCDYWI	168.14	3	893.423	0.58822									E1B6Z6	D	D	D	E1B6Z6		D	D
Lipoprotein lipase	70	K	N	HLIPGVAESVATCHFNHSSKTFMVIHGWTVT	203.06	3	1105.16	-0.4138	P06858	D	D	D	P06858	D	D	D
Lipoprotein lipase	73	K	N	HLIPGVTESVANCHFNHSSKTFVVIHGWTVT	79.898	3	1120.49	1.9486									P11151		D	D
LOC618591 protein	83	U	N	ELKKKYCTEQSKSEANNSIVSFNSSTVHTSC	84.573	3	791.693	-0.26808									A6QQ73	D	D	D
LOC618591 protein	90	U	N	TEQSKSEANNSIVSFNSSTVHTSCPTKDWKL	84.573	3	791.693	0.050362									A6QQ73	D	D	D
LOC788112 protein	61	U	N	RIFGLLESTPPPPDLNSTTIPLNFRIKETVC	101.53	3	881.47	0.4935									A5PJH7	D	D	D	A5PJH7	D	D
LOC788112 protein	98	U	N	RRPRQCPFREGGEERNCTGSFFMLRQLRLLS	83.869	2	626.273	-0.044101									A5PJH7	D	D	D
Low-density lipoprotein receptor-related protein 10	299	S	N	VVSYHTVAWSNGRGFNATYHVRGYCLPWDRP	80.239	3	356.51	0.020372	Q7Z4F1	D	D	D
Lymphocyte antigen 6D	49	U	N	HSVVCPASSRFCKTTNTVEPLRGNLVKKDCA	121.73	2	517.274	-0.72951	Q14210	D	D	D	Q14210	D	D	D
Lymphocyte antigen 75	1076	S	N	ALILNLQKSPFTGTWNFTSCSERHFVSLCQK	204.28	2	890.38	-2.1389	O60449	D	D	D
Lymphocyte antigen 75	865	S	N	ITSFVGLKAIKNKIANISGDGQKWWIRISEW	127.4	2	503.258	0.24221	O60449	D	D	D
Lymphocyte antigen 75	1642	U	N	KSKSGVGRCSMLIASNETWKKVECEHGFGRV	148.18	2	721.831	0.81403	O60449	D	D	D
Lymphocyte antigen 75	1103	S	N	LCQKYSEVKSRQTLQNASETVKYLNNLYKII	117.79	2	611.314	0.035106	O60449	D	D	D	O60449	D	D	D
Lymphocyte antigen 75	934	S	N	PTDCSTKLPFICEKYNVSSLEKYSPDSAAKV	87.639	2	471.737	-0.071838	O60449	D	D	D
Lymphocyte antigen 75	135	S	N	RYRLALKDGHGTAISNASDVWKKGGSEESLC	177.88	3	520.911	-0.6404	O60449	D	D	D
Lymphocyte antigen 75 precursor	866	U	N	LTSFTGLRAIKNKIANISSDEQKWWVRTTEQ	58.676	2	554.274	0.17479									E1BC77	D	D	D
Lymphocyte antigen 75 precursor	935	U	N	PADCSTNLPFVCEKHNVSSLEKYSPDSAAKV	93.111	2	458.735	-0.28459									E1BC77	D	D	D
LYPD3 protein	165	U	N	RKECQGRAPPVVSCYNASDHFYKGCFDGNVT	172.91	2	929.422	0.69129									A4FUZ7	D	D	D
LYPD5 protein	192	U	N	DQSVCFQGNGRMTLGNFSAPVYIRTCQRPSC	70.412	2	736.379	0.52703									A6QP04	D	D		A6QP04	D	D
Lysosomal acid lipase/cholesteryl ester hydrolase	161	K	N	EMAKYDLPASINFILNKTGQEQVYYVGHSQG	100.55	2	755.906	0.1391	P38571		D	D	P38571	D	D	D
Lysosomal acid lipase/cholesteryl ester hydrolase	321	K	N	QAFDWGSSAKNYFHYNQSYPPTYNVKDMLVP	120.63	2	1019.47	5.9515	P38571	D	D	D	P38571	D	D	D
Lysosomal acid phosphatase	133	K	N	LAGLFPPNGMQRFNPNISWQPIPVHTVPITE	237.09	3	821.757	1.2559	P11117	D	D	D	P11117		D	D
Lysosomal acid phosphatase	167	K	N	LKFPLGPCPRYEQLQNETRQTPEYQNESSRN	101.38	2	592.277	0.76806	P11117	D	D	D	P11117	D	D	D
Lysosomal acid phosphatase	92	K	N	WELGQALRQRYHGFLNTSYHRQEVYVRSTDF	132.88	2	699.328	0.30544	P11117	D	D	D
Lysosomal acid phosphatase	177	K	N	YEQLQNETRQTPEYQNESSRNAQFLDMVANE	105.13	2	671.294	-0.5769	P11117	D	D	D	P11117	D	D	D
Lysosomal acid phosphatase	133	S	N	LAGLFPPDGIQRFNPNISWQPIPVHTVPVAE	79.69	3	807.081	0.69902									Q0P5F0		D	D
Lysosomal alpha-glucosidase	390	K	N	RWGYSSTAITRQVVENMTRAHFPLDVQWNDL	111.74	2	490.242	0.60937	P10253		D	D	P10253		D	D
Lysosomal alpha-glucosidase	470	K	N	YRPYDEGLRRGVFITNETGQPLIGKVWPGST	80.706	2	788.927	0.90984	P10253	D	D	D	P10253	D		D
Lysosomal alpha-mannosidase	766	K	N	EILERRRDYRPTWKLNQTEPVAGNYYPVNTR	92.307	2	969.976	0.62895					O00754		D	D
Lysosomal protective protein	144	S	N	AGVGFSYSDDKSYATNDTEVAQSNFEALKDF	152.18	2	995.96	1.7694									Q3MI05	D	D
Lysosome membrane protein 2	412	K	N	ETGDIRTMVFPVMYLNESVHIDKETASRLKS	117.2	3	857.422	-2.4616	Q14108	D	D	D	Q14108	D		D
Lysosome membrane protein 2	249	K	N	KTSLDWWITDKCNMINGTDGDSFHPLITKDE	141.6	2	1011.96	-0.43567	Q14108	D	D	D	Q14108	D	D	D
Lysosome membrane protein 2	105	K	N	TYRELRNKANIQFGDNGTTISAVSNKAYVFE	138.55	2	920.452	0.58012	Q14108	D	D	D	Q14108	D	D	D
Lysosome membrane protein 2	325	U	N	GFCIPKGNCLGSGVLNVSVCKNGAPIIMSFP	88.73	2	783.879	-0.3529									A6QQP4		D	D
Lysosome membrane protein 2	304	U	N	GLPALRYKVPAEILANTSDNAGFCIPKGNCL	164.2	2	1010.5	0.85267									A6QQP4	D		D
Lysosome membrane protein 2	105	U	N	TYRELRNKDDIQFGDNGTTISAVSNKAYVFE	233.87	3	709.674	0.33879									A6QQP4	D	D	D	A6QQP4		D	D
Lysosome-associated membrane glycoprotein 1	249	K	N	ASMGLQLNLTYERKDNTTVTRLLNINPNKTS	179.37	2	469.245	0.47576	P11279	D	D	D	P11279	D	D	D
Lysosome-associated membrane glycoprotein 1	322	K	N	NTILPDARDPAFKAANGSLRALQATVGNSYK	162.51	2	346.185	-0.54615	P11279	D	D	D	P11279	D	D	D
Lysosome-associated membrane glycoprotein 1	103	K	N	PSLVIAFGRGHTLTLNFTRNATRYSVQLMSF	155.06	3	388.208	0.046995	P11279	D	D		P11279	D	D	D
Lysosome-associated membrane glycoprotein 1	84	K	N	SDATVVLNRSSCGKENTSDPSLVIAFGRGHT	263.19	3	676.658	0.10508	P11279	D	D	D	P11279	D	D	D
Lysosome-associated membrane glycoprotein 1	126	S	N	LMRFAYNLSDTDTFPNSSSTGVKTVESATDI	203.06	2	1078.99	0.056842									Q05204		D	D	Q05204	D	D
Lysosome-associated membrane glycoprotein 1	299	S	N	MNESSSRVFLQGVQLNLTLPDAKEGSFTATN	166.35	2	879.998	-0.67152									Q05204	D	D	D
Lysosome-associated membrane glycoprotein 1	161	S	N	NKTYRCVSETQVNMDNVTVTLRDAAIQAYLS	227.89	2	984.966	-0.65549									Q05204	D	D	D
Lysosome-associated membrane glycoprotein 1	314	S	N	NLTLPDAKEGSFTATNSSLRALQATAGNSYK	126.12	2	636.801	0.0020442									Q05204	D	D	D
Lysosome-associated membrane glycoprotein 1	80	S	N	PAGAEVSNSSSCGKENASDSSLVITFGRGHT	88.768	2	749.867	-0.43439									Q05204	D		D
Lysosome-associated membrane glycoprotein 1	72	S	N	PQNKSFELPAGAEVSNSSSCGKENASDSSLV	113.47	2	915.409	1.8195									Q05204		D	D
Lysosome-associated membrane glycoprotein 1	117	S	N	RNATRYEVQLMRFAYNLSDTDTFPNSSSTGV	203.06	2	1078.99	0.056842									Q05204		D	D	Q05204	D	D
Lysosome-associated membrane glycoprotein 1	179	S	N	VTLRDAAIQAYLSSSNFSREETRCEQDLPTP	135.47	2	816.891	0.082172									Q05204	D	D	D
Lysosome-associated membrane glycoprotein 2	356	K	N	GAFQINTFDLRVQPFNVTQGKYSTAQDCSAD	168.26	1	1120.59	-0.29177	P13473	D	D	D	P13473	D	D	D
Lysosome-associated membrane glycoprotein 2	257	K	N	NITQDKVASVININPNTTHSTGSCRSHTALL	261.98	2	1015.99	-0.21639	P13473	D	D	D	P13473	D	D	D
Lysosome-associated membrane glycoprotein 2	49	K	N	TDSENATCLYAKWQMNFTVRYETTNKTYKTV	153.04	2	550.758	-0.14104	P13473	D	D	D	P13473	D	D	D
Lysosome-associated membrane glycoprotein 2	257	U	N	HDKVASVFNINPNTTNATGSCQPQTALLRLS	127.38	2	1390.69	-1.4426									Q3SZJ7	D	D
Lysosome-associated membrane glycoprotein 2	75	U	N	HNKTVPISDLGAATYNGSFCGDDQNGPKIAV	181.82	2	1294.08	-0.061859									Q3SZJ7	D	D
Lysosome-associated membrane glycoprotein 2	254	U	N	NITHDKVASVFNINPNTTNATGSCQPQTALL	127.38	2	1390.69	-1.4426									Q3SZJ7	D	D
Lysosome-associated membrane glycoprotein 2	49	U	N	TDSSNATCLYAKWQMNFTIRYETTDKHNKTV	99.139	2	549.768	0.31816									Q3SZJ7		D	D
Lysosome-associated membrane glycoprotein 2	61	U	N	WQMNFTIRYETTDKHNKTVPISDLGAATYNG	112.75	2	569.767	-0.017345									Q3SZJ7	D	D	D
Lysyl oxidase homolog 4	198	S	N	YEGHWRQVCDQGWTMNNSRVVCGMLGFPSEV	157.5	2	799.832	-0.3921	Q96JB6	D	D	D	Q96JB6	D	D	D
Macrophage mannose receptor 1	1205	K	N	CVYLDLDGYWKTAHCNESFYFLCKRSDEIPA	199.31	2	840.358	1.5803	P22897	D	D	D	P22897	D	D	D
Macrophage mannose receptor 1	344	S	N	NLECVQKLGYICKKGNTTLNSFVIPSESDVP	164.84	3	1322.94	0.56021	P22897	D			P22897	D	D
Macrophage mannose receptor 1	1160	S	N	QMETSNERVWIALNSNLTDNQYTWTDKWRVR	307.22	2	1143.05	-0.37527	P22897	D	D	D	P22897	D	D	D
Macrophage mannose receptor 1	104	S	N	YACDSKSEFQKWECKNDTLLGIKGEDLFFNY	141.58	2	740.374	-0.0091162	P22897	D	D	D	P22897	D	D	D
Macrophage scavenger receptor types I and II	249	S	N	VHLEQEIKGEVKVLNNITNDLRLKDWEHSQT	139.43	2	587.819	-0.17406	P21757	D	D	D
Macrophage scavenger receptor types I and II	220	S	N	FKQQEEMRKLEERIYNASAEIKSLDEKQVYL	79.148	2	506.266	0.20405									P21758	D	D	D
Macrophage scavenger receptor types I and II	142	S	N	LSDNEANLLDAKNFQNFSITTDQRFNDVLFQ	127.56	2	737.346	3.4954									P21758		D	D
Macrophage scavenger receptor types I and II	248	S	N	VYLEQEIKGEMKLLNNITNDLRLKDWEHSQT	92.611	2	594.827	0.30799									P21758	D	D	D
Macrosialin/CD68	279	K	N	LRDLQAPLGQSFSCSNSSIILSPAVHLDLLS	152.65	3	1114.58	0.4226	P34810	D	D	D
Macrosialin/CD68	260	U	N	LRDLQTPLGHSFSCRNASIIVSPALHLDLLS	134.37	3	636.375	0.46926									Q2KIW2	D	D	D	Q2KIW2	D	D
Macrosialin/CD68	145	U	N	PSPGSKEAIGDYTWSNGSQPCVRLQAQIQIR	194.77	2	971.928	-0.009979									Q2KIW2	D	D	D
Major histocompatibility complex class II DR-beta chain	14;14	U;U	N	__RFLELRKSECHFFNGTERVRYLDRYFHNQ	167.32	3	462.859	-0.49274									E7FLM7	D	D	D
Major histocompatibility complex class II DR-beta chain	14	U	N	_AHFLEYYKGECHFFNGTERVRLLDRHFYNG	73.632	2	678.78	-0.75626													E7FLN8		D	D
Major histocompatibility complex, class I, E	107	U	N	AQIFRVNLRTLRGYYNQSEAGSHTLQWMHGC	137.89	4	739.068	-0.39403	Q2L6I5		D	D	Q2L6I5		D	D
Major histocompatibility complex, class II, DQ beta 1	51	U	N	PEDFVYQFKGLCYFTNGTERVRGVTRHIYNR	71.524	2	660.792	0.3097	K4Q0H1	D		D	K4Q0H1	D	D
Major prion protein	197	K	N	ITIKQHTVTTTTKGENFTETDVKMMERVVEQ	88.056	2	571.759	0.57603					P04156		D	D
Major prion protein	208	U	N	ITVKEHTVTTTTKGENFTETDIKMMERVVEQ	91.855	2	578.766	-0.49473									P10279	D	D	D	P10279		D	D
Mannan binding lectin serine peptidase 1	533	U	N	VHLGLHDVRDKSGAVNSSAARVVLHPDFNIQ	53.013	2	461.727	-2.2074									F1MVS9	D	D	D	F1MVS9		D	D
Mannan binding lectin serine peptidase 2	103	U	N	TLCGSESTDTERAPGNDTFYSPGSSLDVTFR	174.65	2	1017.47	-0.69576									E1BJ49	D	D	D
Mannosyl-oligosaccharide 1,2-alpha-mannosidase IA	513	S	N	LQLGAEIARTCHESYNRTFVKLGPEAFRFDG	158.07	2	535.216	-0.72947	P33908	D	D	D	P33908		D	D
Mast/stem cell growth factor receptor Kit	130	K	N	AKLFLVDRSLYGKEDNDTLVRCPLTDPEVTN	101.53	3	504.919	0.22023	P10721	D	D	D	P10721	D	D
Mast/stem cell growth factor receptor Kit	94	S	N	NPEWITEKAEATNTGNYTCTNKGGLSSSIYV	188.13	2	774.33	0.45608									P43481	D	D	D
Matrix-remodeling-associated protein 5	2415	U	N	DGTLLIQKAQRSDSGNYTCLVRNSAGEDRKT	152.7	2	637.782	0.20189	Q9NR99	D		D	Q9NR99	D	D	D
Matrix-remodeling-associated protein 5	2693	U	N	HLEGPQTLGRVSLLDNGTLTVREASVFDRGT	81.494	2	645.861	0.048028	Q9NR99		D	D	Q9NR99	D	D
Matrix-remodeling-associated protein 5	2203	U	N	IDALFSFDSRIKVFANGTLVVKSVTDKDAGD	64.73	2	525.808	-0.26368	Q9NR99	D	D		Q9NR99	D	D
Melanoma inhibitory activity protein 3	250	U	N	QDKLKVPESENNKTSNSSQVSNEQDKIDAYK	188.6	2	1008.97	0.94526	Q5JRA6	D	D		Q5JRA6		D	D
Melanoma inhibitory activity protein 3	589	K	N	QESLGSAPLMGDDHPNASRDSVEGDALVNGA	87.156	3	742.683	-0.63122	Q5JRA6		D	D	Q5JRA6	D		D
Melanoma inhibitory activity protein 3	250	U	N	QDKLKVPDSENNKTSNSSQVSHEQEKIDAYK	295.3	3	488.555	0.27004									Q0VC16	D	D	D
Melanoma inhibitory activity protein 3	587	U	N	REPVGVAAPSGDHQPNASKDSVDEVDGSISG	111.01	2	882.426	-0.78532									Q0VC16	D	D	D
Melanotransferrin	135	S	N	TINTLKGMKSCHTGINRTVGWNVPVGYLVES	122.19	2	474.216	0.27613	P08582	D	D	D
Membrane cofactor protein	83	S	N	YFYIPPLATHTICDRNHTWLPVSDDACYRET	123.02	3	579.591	-0.25917	P15529	D	D	D	P15529	D	D	D
Membrane cofactor protein	92	U	N	QPITPGQVLALVCQDNNTWSSLQEGCKKRRC	40.254	3	1121.88	-1.2165									F6K7I9	D	D	D	F6K7I9		D	D
Membrane protein FAM174A	83	S	N	RGLAEAAGPRGSEGGNGSNPVAGLETDDHGG	105.96	2	1029.45	-0.26234					Q8TBP5	D	D	D
Membrane tyrosine phosphatase	292	U	N	KTQDGIDLHNLRPFTNYTVVLQARVTGKVTR	193.39	4	669.351	0.44242									Q9GMB4	D	D	D
Membrane tyrosine phosphatase	234	U	N	NKTIETDFGEPEAPQNFTCSAKNATEGKCTW	257.81	2	1123	0.26492									Q9GMB4	D	D	D
Metalloendopeptidase	365	U	N	CVWRISVTPGEKIILNFTSMDLYRSRLCWYD	151.1	2	744.886	-0.37525									E1BEV7	D	D	D
Metalloendopeptidase	93	U	N	QRATRRSSIKAAVSGNSSTLNSQNTSMKPQR	138.3	3	727.687	-0.27855									E1BEV7	D		D
Metalloproteinase inhibitor 1	53	K	N	SDLVIRAKFVGTPEVNQTTLYQRYEIKMTKM	211.06	3	585.965	0.55994	P01033	D	D	D	P01033	D	D	D
Metalloproteinase inhibitor 1	101	K	N	TPAMESVCGYFHRSHNRSEEFLIAGKLQDGL	110.29	3	497.588	-0.73389	P01033		D	D	P01033	D	D	D
Metalloreductase	323	K	N	TLVIPIRYYVRWRLGNLTVTQAILKKENPFS	111.94	3	467.957	0.039537	Q687X5	D	D	D	Q687X5	D	D	D
MHC class I antigen	110	U	N	AQTDRVSLRNLRGYYNQSEAGSHILQRMYGC	258.81	2	863.407	-0.17527	Q7YQB3	D	D	D	Q7YQB3	D	D	D
MHC class I antigen	107	U	N	ALWYREALNNLRGYYNQSEAGSHTYQRMYGC	191.19	3	996.412	-2.727									O77977	D	D	D	O77977		D	D
MHC class I heavy chain	81	U	N	AQFFRVSLNNLRGYYNQSEAGSHTLQLMSGC	113.6	3	950.75	0.5672									O78058	D	D	D
MHC class II antigen	48;48	S;U	N	__RFLWQPKRECHFFNGTERVRFLDRYFYNQ;RPRFLWQPKRECHFFNGTERVRFLDRYFYNQ	215.06	3	485.882	-0.40676									Q8MHP1	D	D	D	Q8MHP1	D	D
MHC class II antigen	109	U	N	IAILNNNLNTLIQRSNHTQAANDPPEVTMFP	51.166	3	662.975	0.54574	A0A140EDI1	D		D
MHC class II antigen	149	U	N	NTLICHIDRFFPPVLNVTWLCNGEPVTEGVA	66.012	3	1097.89	-1.8566	A0A140EDI1	D	D	D
MHC class II antigen beta chain (Fragment)	13	U	N	__RFLEYATSECHFFNGTERVRYLDRYFHNQ	195.62	3	704.307	-2.0998									V5RF39	D	D	D
MHC class II HLA-DR-beta	11	U	N	_____EYSTSECHFFNGTERVRFLERYFHNQ	194.55	3	622.921	0.81994	P79550	D	D	D
Microfibril-associated glycoprotein 4	87;87	K;S	N	MTTEGGKWTVFQKRFNGSVSFFRGWNDYKLG	188.66	2	532.258	0.086061	P55083	D	D	D					P55918		D	D
Microfibril-associated glycoprotein 4	137	K	N	LKQKYELRVDLEDFENNTAYAKYADFSISPN	159.58	2	816.37	-0.12619					P55083	D	D	D
Monocyte differentiation antigen CD14	151	K	N	PLEATGLALSSLRLRNVSWATGRSWLAELQQ	114.71	2	447.222	-0.31802	P08571	D	D	D	P08571	D	D	D
Monocyte differentiation antigen CD14	282	K	N	PSAPRCMWSSALNSLNLSFAGLEQVPKGLPA	178.41	2	1228.1	0.17468	P08571	D	D	D	P08571	D	D	D
Monocyte differentiation antigen CD14	280	S	N	PGATRCVWPSALRSLNLSFAGLEQVPKGLPP	153.09	2	753.408	-0.06726									Q95122	D	D	D	Q95122		D	D
MSLN protein	293	U	N	LGGASTEDLRVFTSQNISIDAAAFKKLTTEA	154.07	2	807.917	-4.8558									A6QP39	D	D	D
MSLN protein	264	U	N	PQMAVLYHKAHMAFQNVSGSEYFTRIKPFLG	179.25	3	616.614	1.3074									A6QP39	D	D	D
MSLN protein	166	U	N	SYFFLYVTPEDIHKWNVTSLDTVKSLLKVSQ	94.616	2	583.303	0.02767									A6QP39	D	D	D	A6QP39		D	D
Mucin	320	U	N	YSMCLSDVSLRLVNWNSSHPTCAGRVEIYHG	188.13	2	801.372	-0.14357									Q28908	D	D	D	Q28908	D	D	D
Mucin-1	384	S	N	VSLYFLSFRITNLQFNSSLENPQTSYYQELQ	377.95	2	1388.67	0.39235									Q8WML4	D	D	D	Q8WML4	D	D
Mucin-15	225	U	N	LQPTLKFTNNSKLFPNTSDPQKENRNTGIVF	121.28	3	516.923	0.95567	Q8N387	D	D	D	Q8N387	D	D	D
Mucin-15	89	S	N	FEDPSNKTHETGFYSNLSTDNSSRSPSLMPT	205.78	3	641.278	0.0085006									Q8MI01		D	D	Q8MI01	D	D	D
Mucin-15	221	S	N	LHPTLKFTNNSKIFPNTSDPQEENRNTGVVF	118.37	2	775.354	0.1399									Q8MI01	D	D	D	Q8MI01	D	D
Mucin-15	54	S	N	LKTMENQSVPLESKANLTSDKENRETSNPKA	189.72	2	575.783	0.08614									Q8MI01	D	D	D	Q8MI01	D	D	D
Mucin-15	94	K	N	NKTHETGFYSNLSTDNSSRSPSLMPTLSPRS	183.77	3	641.278	0.0085006									Q8MI01	D	D	D	Q8MI01	D	D	D
Mucin-15	30	K	N	SLLLFGSHGEEGQKTNTTESTAEDLKTMENQ	170.07	2	656.804	0.84058									Q8MI01	D	D	D	Q8MI01		D	D
Mucin-15	44	S	N	TNTTESTAEDLKTMENQSVPLESKANLTSDK	163.99	2	683.326	-1.6549									Q8MI01	D	D	D	Q8MI01		D	D
Mucin-15	71	K	N	TSDKENRETSNPKASNFSFEDPSNKTHETGF	145.29	2	674.787	0.4101									Q8MI01	D	D	D	Q8MI01	D	D	D
Mucin-15	79	K	N	TSNPKASNFSFEDPSNKTHETGFYSNLSTDN	145.29	2	673.293	-0.063453									Q8MI01	D	D	D	Q8MI01	D	D	D
Mucin-20	622	S	N	LPSVPPTTTNSSRGTNSTLAKITTSAKTTMK	58.596	2	397.711	0.33999	Q8N307		D	D
Mucin-4	1685	S	N	CDGDSSCIYDTLALRNASIGLHTREVSKNYE	111.61	2	486.261	0.90157	Q99102	D	D	D	Q99102	D	D	D
Mucin-4	2049	S	N	FQPISGEDVRDVTALNVSTLKAYFRCDGYKG	155.98	2	582.324	-0.24479	Q99102	D	D	D	Q99102	D	D	D
Mucin-4	1739	S	N	GQTTLIQYTSNAEDANFTLRDSCTDLELFEN	226.44	2	1125.04	3.0507	Q99102	D	D	D	Q99102	D	D	D
Mucin-4	1703	S	N	IGLHTREVSKNYEQANATLNQYPPSINGGRV	227.06	2	1105.52	-0.023626	Q99102	D	D	D	Q99102	D	D	D
Mucin-4	622	S	N	LDRHTSQQITTAPSTNHSTIHSTSTSPQESP	221.86	4	877.421	-0.15648	Q99102	D	D	D	Q99102	D	D	D
Mucin-4	1659	S	N	LPSNFTPVFYSQLQKNSSWAEHLISNCDGDS	301.49	2	1494.16	-1.5548	Q99102	D	D	D	Q99102	D	D	D
Mucin-4	1809	K	N	NAESQCLYNQTSRVGNSSLEVAGCKCDGGTF	169.23	2	612.295	-2.0468	Q99102	D	D	D	Q99102	D	D	D
Mucin-4	1647	U	N	NGTGLLGKRNDQLPSNFTPVFYSQLQKNSSW	242.8	2	1066.52	-0.27886	Q99102	D	D	D	Q99102	D	D	D
Mucin-4	1525	S	N	QWLLEPHDAIRVLLDNQTVTFQPDHEDGGGQ	186.17	3	1155.56	0.44265	Q99102	D	D	D
Mucin-4	1802	S	N	RTVVCHCNAESQCLYNQTSRVGNSSLEVAGC	332.07	2	1166.99	0.48845	Q99102	D	D	D	Q99102	D	D	D
Mucin-4	260	S	N	SPSGETATSSLCSVTNTSMMTSEKITVTTST	123.64	2	1299.06	0.38712	Q99102	D	D	D	Q99102	D	D	D
Mucin-4	1857	S	N	SVHCVPGKGCEACPPNLTGDGRHCAALGSSF	122.64	2	753.814	-0.63828	Q99102	D	D	D	Q99102	D	D	D
Mucin-4	1544	S	N	TFQPDHEDGGGQETFNATGVLLSRNGSEVSA	186.17	3	1155.56	0.44265	Q99102	D	D	D
Mucin-4	235	S	N	THRTTSTPSFSPSVHNVTGTVSQKTSPSGET	188.26	2	1083.03	0.36491	Q99102	D	D	D	Q99102	D	D	D
Mucin-5B	5096	K	N	SHYSTFDGTSYTFRGNCTYVLMREIHARFGN	78.934	2	558.757	0.23758	Q9HC84	D	D	D
Mucin-5B	5046	K	N	VGDNRVVLLDPKPVANVTCVNKHLPIKVSDP	127.75	2	552.784	-0.70782	Q9HC84	D	D	D	Q9HC84	D	D
Multiple inositol polyphosphate phosphatase 1	242	K	N	RFFDHCEKFLTEVEKNATALYHVEAFKTGPE	327.02	3	738.384	0.7948	Q9UNW1	D	D	D	Q9UNW1	D	D	D
Myelin protein zero-like protein 1	50;50	K;S	N	VSALEVYTPKEIFVANGTQGKLTCKFKSTST	138.25	2	583.801	0.68593	O95297	D	D	D	O95297	D	D	D	Q32PI9		D	D	Q32PI9		D	D
Myelin protein zero-like protein 2	39	K	N	IAAVEIYTSRVLEAVNGTDARLKCTFSSFAP	100.55	2	574.296	0.5157	O60487	D	D	D	O60487	D	D	D
Myelin protein zero-like protein 2	118	S	N	RYDASILLWKLQFDDNGTYTCQVKNPPDVDG	73.887	2	846.377	0.48134	O60487	D	D	D	O60487	D	D	D
Myeloid cell surface antigen CD33	99	U	N	EETQGRFRLLGDPSRNNCSLSIVDARRRDNG	91.313	2	626.298	0.3958					P20138	D	D	D
Myeloid cell surface antigen CD33	100	S	N	ETQGRFRLLGDPSRNNCSLSIVDARRRDNGS	91.313	2	626.298	0.3958					P20138	D	D	D
Myeloid cell surface antigen CD33	113	S	N	RNNCSLSIVDARRRDNGSYFFRMERGSTKYS	124.98	2	504.719	0.024147					P20138	D	D
Myeloid cell surface antigen CD33	209	S	N	SSVLIITPRPQDHGTNLTCQVKFAGAGVTTE	127.71	3	936.152	0.42659					P20138	D	D	D
Myeloperoxidase	323	K	N	DCIPFFRSCPACPGSNITIRNQINALTSFVD	158.25	2	718.331	-0.1129	P05164	D	D	D	P05164	D	D	D
Myeloperoxidase	729	K	N	KNNIFMSNSYPRDFVNCSTLPALNLASWREA	135.28	2	983.982	-1.5756	P05164	D	D	D
Myeloperoxidase	391	K	N	LLPFDNLHDDPCLLTNRSARIPCFLAGDTRS	223.5	2	1064.02	0.8071	P05164	D	D	D	P05164	D	D	D
Myeloperoxidase	355	K	N	SMVYGSEEPLARNLRNMSNQLGLLAVNQRFQ	211.38	2	788.904	0.30884	P05164	D	D	D	P05164	D
Myeloperoxidase	297	U	N	DCIPFFRSSPACTQSNITIRNQINALTSFVD	180.09	2	719.348	0.0893									A6QPT4	D	D	D	A6QPT4	D	D	D
Myeloperoxidase	457	U	N	GREAMRKYLRPYCSYNDSVDPRISNVFTNAF	83.823	3	636.621	0.035763									A6QPT4	D	D	D
Myeloperoxidase	329	U	N	SMVYGSEDPLAMRLRNLTNQLGLLAVNTRFQ	205.26	2	765.43	0.13458									A6QPT4	D	D	D	A6QPT4	D	D	D
N-acetylglucosamine-1-phosphotransferase subunit gamma	88	By similarity	N	SLVESTYKYEFCPFHNVTQHEQTFRWNAYSG	246.45	2	1122	-0.064811	Q9UJJ9	D	D	D	Q9UJJ9	D	D	D
N-acetylglucosamine-1-phosphotransferase subunit gamma	88	By similarity	N	SLVESTYKYELCPFHNVTQHEQTFRWNAYSG	81.317	3	737.005	0.11067									Q58CS8	D		D
N-acetylglucosamine-1-phosphotransferase subunits alpha/beta	684	U	N	IPKEKRFPKFKRHDVNSTRRAQEEVKIPLVN	133.9	2	416.196	-0.4089	Q3T906	D	D	D
N-acetylglucosamine-6-sulfatase	405;413	S;S	N	QMDGMSLLPILRGASNLTWRSDVLVEYQGEG	81.548	2	454.23	-0.18843	P15586	D	D	D	P15586	D	D	D	Q1LZH9	D	D	D
N-acetylglucosamine-6-sulfatase	370	S	N	DIKVPLLVRGPGIKPNQTSKMLVANIDLGPT	162.68	2	565.309	0.10263									Q1LZH9		D	D
N-acylethanolamine-hydrolyzing acid amidase	37	K	N	GAGLSAASPPAAPRFNVSLDSVPELRWLPVL	186.02	2	689.859	1.4645	Q02083	D	D	D	Q02083		D	D
Natural resistance-associated macrophage protein 2	336	S	N	AFFGKTNEQVVEVCTNTSSPHAGLFPKDNST	97.49	3	806.721	-0.47775	P49281	D	D
NBL1, DAN family BMP antagonist	38	U	N	KLALFPDKSAWCEAKNITQIVGHSGCEAKSI	95.822	2	758.869	-0.42602													F1MNJ9		D	D
Neprilysin	145	K	N	IVAVQKAKALYRSCINESAIDSRGGEPLLKL	72.089	2	627.779	-0.04069	P08473	D	D	D
Neuropathy target esterase	11	S	N	_____MGTSSHGLATNSSGAKVAERDGFQDV	151.9	2	710.333	-1.0854	Q8IY17	D	D	D	Q8IY17	D	D	D
Neuropilin-1	522(521)	K	N	RENKVFMRKFKIGYSNNGSDWKMIMDDSKRK	97.163	2	622.277	-0.48723	O14786	D	D	D	O14786		D	D
Neuropilin-1	150	K	N	SIRYEIFKRGPECSQNYTTPSGVIKSPGFPE	182.57	3	632.972	-0.15341	O14786	D	D	D	O14786	D	D	D
Neuroplastin	229;113	K;U	N	GEYHCVYHFVSAPKANATIEVKAAPDITGHK;GEYHCVYQFLSAPKANATIEVKAAPDITGHK	118.26	2	424.734	0.27822	Q9Y639	D	D	D	Q9Y639	D	D	D	Q0VD06	D	D	D
Neuroplastin	197	S	N	SYWTKNGVELSATRKNASNMEYRINKPRAED;SYWTKNGVELTATRKNASNMEYRINKPRAED	163.38	2	494.208	-0.50011	Q9Y639	D	D	D	Q9Y639	D	D	D
Neuroplastin	171	S	N	VIIRDSPVLPVTLQCNLTSSSHTLTYSYWTK	151.66	3	1034.51	0.11838					Q9Y639	D		D
Neuroplastin	284	K	N	WIWRKKENGMPMDIVNTSGRFFIINKENYTE	74.678	2	762.339	-0.40021	Q9Y639	D	D	D	Q9Y639	D		D
Neuroserpin	157	S	N	SQNVAVANYINKWVENNTNNLVKDLVSPRDF	77.062	2	667.335	0.16228	Q99574	D	D	D
Neuroserpin	321	S	N	VLKALGITEIFIKDANLTGLSDNKEIFLSKA	93.753	2	575.777	-0.44839	Q99574	D	D
Neutral amino acid transporter B(0)	212	K	N	VSAAFRSYSTTYEERNITGTRVKVPVGQEVE	95.428	3	594.279	-1.3545					Q15758	D	D	D
Neutrophil elastase	88	K	N	ANVNVRAVRVVLGAHNLSRREPTRQVFAVQR	89.171	2	534.806	0.84786	P08246	D	D	D
Neutrophil elastase	173	K	N	LLGRNRGIASVLQELNVTVVTSLCRRSNVCT	271.82	2	1031.56	-0.11884	P08246	D	D	D
Neutrophil gelatinase-associated lipocalin	85	K	N	KMYATIYELKEDKSYNVTSVLFREKAQKCDY	128.81	2	594.811	0.073271	P80188	D	D	D	P80188			D
Nicalin	428;428	S;U	N	RNTRIIAEALTRVIYNLTEKGTPPDMPVFTE	104.44	2	491.771	-0.73077	Q969V3	D	D	D	Q969V3	D	D	D	Q1LZC3	D	D	D	Q1LZC3		D	D
Nicastrin	55;55	K;U	N	IYIPLNKTAPCVRLLNATHQIGCQSSISGDT	192.3	3	922.804	0.39841	Q92542	D	D	D	Q92542	D	D	D	Q3SZQ1	D	D	D	Q3SZQ1		D	D
Nicastrin	264	K	N	DPLSDYNVWSMLKPINTTGTLKPDDRVVVAA	102.73	3	477.584	-0.13615	Q92542	D	D		Q92542		D	D
Nicastrin	417	S	N	EKSGAGVPAVILRRPNQSQPLPPSSLQRFLR	92.063	2	854.455	0.86387	Q92542	D	D	D	Q92542	D	D	D
Nicastrin	612	K	N	KDLYEYSWVQGPLHSNETDRLPRCVRSTARL	181.4	4	833.907	0.36882	Q92542	D	D	D	Q92542	D	D	D
Nicastrin	530	K	N	PQTVTRLLYGFLIKANNSWFQSILRQDLRSY	206.97	2	669.838	0.41772	Q92542	D	D	D	Q92542	D	D	D
Nicastrin	435	K	N	QPLPPSSLQRFLRARNISGVVLADHSGAFHN	206.74	2	884.947	-0.082134	Q92542	D	D	D	Q92542	D	D	D
Nicastrin	387	K	N	TSLELWMHTDPVSQKNESVRNQVEDLLATLE	249.47	3	792.718	0.12031	Q92542	D	D	D	Q92542	D	D	D
Nicastrin	417	U	N	EQSGAGVPTVVLRRLNQSQPLPPSSLQRFLR	161.21	3	575.316	1.094									Q3SZQ1	D	D	D	Q3SZQ1	D	D	D
Nicastrin	612	U	N	KDLYEYTWVQGPLNANETDRLPRCVRSTARL	159.8	2	1144.02	-0.60894									Q3SZQ1	D	D	D	Q3SZQ1	D
Nicastrin	530	U	N	PHTVTRLLYGFLVRANNSWFQSILRPDLRSY	206.97	3	607.316	0.36357									Q3SZQ1	D	D	D
Nicastrin	508	U	N	VLARALYRLAGGASFNDTIQADPHTVTRLLY	177.4	2	1037.51	0.55879									Q3SZQ1	D	D	D	Q3SZQ1	D	D	D
Nidogen-2	703;712	U;U	N	TFGAINQTWSYRIHQNITYQVCRHAPRHPSF	124.1	3	478.906	-0.62891	Q14112	D	D	D	Q14112	D			A7E306	D	D	D
Niemann-Pick disease, type C1 variant	233	U	N	PVFSDFPVRGMEPMNNATKGCDESVDEVTAP	105.86	2	548.238	-0.37451	Q59GR1		D	D	Q59GR1	D	D	D
Nodal modulator 2	618	S	N	EFYQDGNGRENVGIYNLSKGVNRFCLSKPGV	205.32	1	1139.58	-0.69896	Q5JPE7	D	D	D	Q5JPE7	D	D	D
Nodal modulator 2	218	S	N	NSNANAASPLIVAGYNVSGSVRSDGEPMKGV	118.01	3	788.74	0.16163					Q5JPE7	D	D
Nodal modulator 2	369	U	N	QIKVKTKADGSFRLENITTGTYTIHAQKEHL	123.29	3	564.961	-0.15337	Q5JPE7	D	D	D	Q5JPE7	D	D	D
NPC1 protein	185	U	N	EKALGLLCGREASACNATNWIEYMFNKDNGQ	64.52	2	1026.44	-0.62627													B0JYK2		D	D
NPC1 protein	1028	U	N	KGGHAAYSAAVNILDNGTRVGATYFMTYHTV	141.55	3	597.295	-0.12219									B0JYK2	D	D	D	B0JYK2	D		D
Nucleotide exchange factor SIL1	193;194	K;S	N	IETDMQIMVRLINKFNSSSSSLEEKIAALFD	234.21	3	563.617	-0.33221	Q9H173	D	D	D	Q9H173	D	D	D	Q32KV6	D	D	D
Olfactomedin-4	193	U	N	GGSSEIVDQLEVEIRNMTLLVEKLETLDKNN	107.57	2	475.759	0.40158	Q6UX06	D	D	D	Q6UX06	D		D
Olfactomedin-4	253	S	N	HPPPTPGSCGHGGVVNISKPSVVQLNWRGFS	232.38	3	1245.3	-0.054323	Q6UX06	D	D	D	Q6UX06	D	D
Olfactomedin-4	352	U	N	NMYVNMYNTGNIARVNLTTNTIAVTQTLPNA	277.6	2	1196.62	-0.35321	Q6UX06	D	D	D	Q6UX06	D	D	D
Olfactomedin-4	136	S	N	REYVQLISVYEKKLLNLTVRIDIMEKDTISY	162.51	2	416.263	-0.22554	Q6UX06	D	D	D	Q6UX06	D	D	D
Olfactomedin-4	72	S	N	SRSLGSGGSVSQLFSNFTGSVDDRGTCQCSV	234.04	2	1110.52	0.093098	Q6UX06	D	D	D
Olfactomedin-4	411	U	N	YSTEASTGNMVISKLNDTTLQVLNTWYTKQY	240.2	2	908.461	4.5512	Q6UX06	D	D	D	Q6UX06	D	D	D
Olfactomedin-4	138	U	N	KEYVQLISKYEEKLLNLTVRVSIMEKDSISY	162.51	2	416.263	-0.22554									F1MVJ8	D	D	D	F1MVJ8		D	D
Olfactomedin-4	351	U	N	NMYVNWYNSQNMAKINLTTNKVDLSQTLPNA	111.04	2	403.729	0.15939									F1MVJ8	D	D	D	F1MVJ8		D	D
Olfactomedin-4	252	U	N	PPPPAPGSCAHGGVANISKPIIVQLNWLGFS	49.106	3	745.032	1.52									F1MVJ8		D	D
Olfactomedin-4	195	U	N	SGSTVIIDQLEVEIRNMTLLVEQLETLDKNN	208.92	3	810.777	-0.4405									F1MVJ8	D	D	D
Olfactomedin-4	410	U	N	YATEASTGNIVISKLNDTTLAVLNTWHTKQY	157.35	3	577.305	0.15535									F1MVJ8	D	D	D	F1MVJ8	D	D	D
Oncostatin M receptor	42	U	N	AERLPLTPVSLKVSTNSTRQSLHLQWTVHNL	145.04	2	384.193	-0.30535	Q99650	D		D	Q99650			D
Oncostatin M receptor	580	S	N	TQDVLGDFQWKNVGPNTTSTVISTDAFRPGV	142.78	3	731.378	0.43548	Q99650		D	D	Q99650	D	D	D
Oncostatin M receptor	373	U	N	CQLQLLGEGKVIQQHNISVRVNGEYLLSELK	120.09	2	598.835	-0.1008									F1MGK8	D	D	D	F1MGK8	D	D	D
Oncostatin M receptor	238	U	N	EGVVLLVSKVLEEPKNFSCETQDLKTLTCTW	113.69	3	647.312	-0.35753									F1MGK8		D	D
Oncostatin M receptor	340	U	N	PMAPYSLFPKSVSATNATVTWKVYSIGSSSA	93.959	2	634.324	-0.19892									F1MGK8	D		D
Osteopetrosis-associated transmembrane protein 1	135	S	N	QQVVSKMDNISRAAGNTSESQSCARSLLMAD	138.42	2	671.283	-0.58136	Q86WC4	D	D	D
Osteopetrosis-associated transmembrane protein 1	136	U	N	QQVANKMDNISRAVGNSSESHSCARSLLMAD	196.57	2	682.791	-0.44894									Q0VCT5	D	D	D
Oxidized low-density lipoprotein receptor 1	69	S	N	LQLSQVSDLIKKQQANITHQEDILEGQILAQ	163.45	3	770.064	0.24156									P79391	D	D	D
P2X purinoceptor	128	U	N	AQGHCAENPEGGTCTNNSGCTPGKAERKAQG	40.285	3	879.02	-0.33108									E1BIP1		D	D
P2X purinoceptor	273	U	N	LSQGFNFRFARHFVENGTNYRHLFKVFGIRF	73.067	2	620.286	0.52136									E1BIP1	D	D	D
P2X purinoceptor 4	184;184	K;S	N	DDTEVPKPAFLKAAENFTLLVKNNIWYPKFN	85.377	2	554.81	0.53955	Q99571	D	D	D					Q5E9U1	D	D	D
P2X purinoceptor 4	153	S	N	GTHSNGVSTGRCVAFNGSVKTCEVAAWCPVE	70.028	2	492.739	0.09673	Q99571	D	D	D
P2X purinoceptor 4	208	S	N	IWYPKFNFSKRNILPNITTTYLKSCIYDAKT	73.466	2	697.395	0.34613	Q99571	D	D	D
P2X purinoceptor 4	75	S	N	VVSSVTTKVKGVAVTNTSKLGFRIWDVADYV	84.213	2	440.237	0.30311	Q99571	D	D	D
P2X purinoceptor 4	153	S	N	GTHSSGVATGRCVSFNGTLKTCEVAAWCPVE	68.657	2	514.752	0.26751									Q5E9U1	D		D
P2X purinoceptor 7	284	K	N	CRPKYSFRRLDDKTTNVSLYPGYNFRYAKYY	59.185	2	767.875	2.0558	Q99572		D	D
P2X purinoceptor 7	202	K	N	NFTVLIKNNIDFPGHNYTTRNILPGLNITCT	114.87	2	776.357	2.5468	Q99572	D	D	D
Palmitoyl-protein thioesterase 1	232	K	N	KNLMALKKFVMVKFLNDSIVDPVDSEWFGFY	164.68	2	1155.04	0.082446	P50897	D	D	D	P50897	D	D	D
Palmitoyl-protein thioesterase 1	212	K	N	NHSIFLADINQERGINESYKKNLMALKKFVM	89.752	2	471.245	-0.075921	P50897	D	D	D	P50897	D	D	D
Palmitoyl-protein thioesterase 1	197	K	N	QAEYWHDPIKEDVYRNHSIFLADINQERGIN	246.53	3	520.595	0.50854	P50897	D	D	D	P50897	D	D	D
Pantetheinase	201	S	N	EDQFNAPKEPEVVTFNTTFGKFGIFTCFDIL	101.38	2	736.364	-0.30067									Q58CQ9	D	D	D
Pantetheinase	147	S	N	NSIYIVANIGDKKSCNASDPQCPPDGRYQYN	142.97	2	782.306	0.48953									Q58CQ9		D	D
PCDHGB4 protein	543	U	N	LTLQARDHGSPALSSNVSLRVLVGDRNDNAP	148.72	3	481.576	0.63377													A6QNV3	D	D	D
Peptidyl-prolyl cis-trans isomerase B	148;148	S	N	YGPGWVSMANAGKDTNGSQFFITTVKTAWLD	180.84	2	730.861	0.0059979	P23284	D	D	D	P23284	D	D	D	P80311	D	D	D
Peptidyl-prolyl cis-trans isomerase C	190	U	N	SIELQATDGHDRPLTNCSIINSGKIDVKTPF	118.05	5	716.958	0.65227	P45877		D	D
Peroxidasin homolog	1280	S	N	IKQTSLARILCDNADNITRVQSDVFRVAEFP	110.66	2	654.311	-0.3735	Q92626	D	D	D	Q92626	D	D	D
Peroxidasin homolog	731	S	N	LIANLSGCTAHRRVNNCSDMCFHQKYRTHDG	178.71	2	771.805	-0.93113	Q92626	D	D	D	Q92626	D	D	D
Peroxidasin homolog	1178	K	N	RDHGIPPYHDYRVYCNLSAAHTFEDLKNEIK	119.45	2	885.916	1.44	Q92626	D	D	D	Q92626	D	D	D
Phosphatidic acid phosphatase type 2A	142	U	N	RPHFLDVCDPDWSKINCSDGYIENYICRGNA	164.93	2	890.382	0.40041									Q32KV9	D		D	Q32KV9	D	D
Phosphatidylinositol-glycan-specific phospholipase D	658	S	N	MGKLGTSLSSGHVMVNGTRTQVLLVGAPTQD	85.469	3	540.275	-1.8303									P80109	D	D
Phospholipid transfer protein	143;157	K;	N	ALQLSRDTIGRIKVSNVSCQASVSRMHAAFG	140.91	2	648.809	0.31611	P55058	D	D	D	P55058	D	D	D	Q58DL9	D
Phospholipid transfer protein	398	K	N	ALRTQLDLRRFRIYSNHSALESLALIPLQAP	150.29	3	761.094	-0.59714	P55058	D	D	D	P55058	D	D	D
Phospholipid transfer protein	64	K	N	ITIPDLRGKEGHFYYNISEVKVTELQLTSSE	183.79	3	558.607	0.4227	P55058	D	D	D	P55058	D	D	D
Piezo-type mechanosensitive ion channel component 1	2294	K	N	RISPPSRAQMKRELYNGTADITLRFTWNFQR	106.49	2	684.848	-0.01248	Q92508	D	D	D	Q92508	D	D	D
Piezo-type mechanosensitive ion channel component 1	2331	U	N	TVEYANEKHMLALAPNSTARRQLASLLEGTS	121.08	2	650.832	2.2316	Q92508	D	D	D	Q92508	D	D	D
Pigment epithelium-derived factor	285	K	N	GSMSIIFFLPLKVTQNLTLIEESLTSEFIHD	271.13	3	859.437	-0.25449	P36955	D		D	P36955	D	D	D	Q95121	D	D	D
Pituitary tumor-transforming 1 protein-interacting protein	54	S	N	ACSQNTNKTCEECLKNVSCLWCNTNKACLDY	170.5	2	1159.99	0.42514	P53801	D	D	D	P53801	D	D	D
Pituitary tumor-transforming 1 protein-interacting protein	49	U	N	GCSQNTSRTCEECLKNVSCLWCNANKMCLDY	107.03	2	684.8	-1.4049									Q2KI48	D	D	D	Q2KI48		D	D
Plasma kallikrein	494	K	N	EGNHDIALIKLQAPLNYTEFQKPICLPSKGD	93.684	3	750.729	0.01691					P03952	D	D	D
Plasma protease C1 inhibitor	238	K	N	QIFHSPDLAIRDTFVNASRTLYSSSPRVLSN	140.09	2	456.719	0.18666	P05155	D	D	D	P05155	D	D	D
Plasma serine protease inhibitor	262	K	N	DRNLSCRVVGVPYQGNATALFILPSEGKMQQ	79.467	3	721.724	1.6559	P05154		D	D	P05154	D		D
Plasma serine protease inhibitor	249	K	N	PMMSREDQYHYLLDRNLSCRVVGVPYQGNAT	215.93	2	992.957	1.3766	P05154	D	D	D	P05154	D	D	D
Plasma serine protease inhibitor	258	S	N	DRNLSCKVVGVPYQGNATAFFILPREGEMEQ	146.3	3	651.356	-0.79891									Q9N2I2	D	D	D
Plasma serine protease inhibitor	334	S	N	IRDIFTSDADLTGISNHSSIRVSEMVHKAVV	331.19	3	684.664	-0.22096									Q9N2I2	D	D	D
Platelet derived growth factor C	55;16	By similarity；U	N	GVQDPQHERIITVSTNGSIHSPRFPHTYPRN	173.06	3	495.603	-0.046328	Q9NRA1	D	D	D	Q9NRA1	D	D	D	E1BJY4	D	D	D	E1BJY4	D	D
Platelet derived growth factor C	254	U	N	NLLTEEVRLYSCTPRNFSVSIREELKRTDTI	111.04	2	413.221	0.39184	Q9NRA1	D	D	D
Platelet derived growth factor receptor-like protein	219	S	N	KVTLHREFPAKEIPANGTDIVYDMKRGFVYL	106.13	2	784.874	-1.7372					Q15198	D	D	D
Platelet endothelial cell adhesion molecule	453	K	N	LPISYQLLKTSKVLENSTKNSNDPAVFKDNP	104.45	2	397.213	0.68885	P16284	D	D
Platelet glycoprotein 4	247	S	N	GKRNLSYWESHCDMINGTDAASFPPFVEKSQ	231.68	4	795.107	0.03589	P16671	D	D	D	P16671		D	D
Platelet glycoprotein 4	417	K	N	LKNLKRNYIVPILWLNETGTIGDEKANMFRS	189.77	3	778.746	-0.11308	P16671	D	D	D	P16671	D	D	D
Platelet glycoprotein 4	235	S	N	NISKVAIIDTYKGKRNLSYWESHCDMINGTD	231.68	4	795.107	0.03589	P16671	D	D	D	P16671		D	D
Platelet glycoprotein 4	220	S	N	NNTADGVYKVFNGKDNISKVAIIDTYKGKRN	160.88	3	376.529	1.323	P16671	D	D	D	P16671	D	D	D
Platelet glycoprotein 4	321	K	N	NPDNYCFCTEKIISKNCTSYGVLDISKCKEG	246.45	2	824.384	-0.45018	P16671	D	D	D	P16671	D	D	D
Platelet glycoprotein 4	79	S	N	QFWIFDVQNPQEVMMNSSNIQVKQRGPYTYR	231.93	4	697.086	-0.15929	P16671	D	D	D	P16671	D	D	D
Platelet glycoprotein 4	205	K	N	VPYPVTTTVGLFYPYNNTADGVYKVFNGKDN	140.04	3	1118.9	0.089572	P16671	D	D	D	P16671	D	D	D
Platelet glycoprotein 4	235	K	N	DISKVAIIDTYKGRKNLSYWSSYCDLINGTD	278.08	2	1494.17	-3.0809									P26201	D	D	D	P26201		D	D
Platelet glycoprotein 4	247	K	N	GRKNLSYWSSYCDLINGTDAASFPPFVEKTR	278.08	2	1492.68	1.093									P26201	D	D	D	P26201		D	D
Platelet glycoprotein 4	172	K	N	ILNSFIKKSKSSMFQNRTLKELLWGYTDPFL	122.79	2	436.694	0.60037									P26201	D	D	D	P26201		D	D
Platelet glycoprotein 4	417	K	N	LKNLKHNYIVPILWLNETGTIGDEKAEMFRN	277.07	2	1158.09	0.27544									P26201	D	D	D
Platelet glycoprotein 4	321	K	N	NPDNHCFCTEKIISKNCTLYGVLDIGKCKEG	120.29	2	822.405	0.74485									P26201	D	D	D	P26201	D	D	D
Platelet glycoprotein 4	79	K	N	QFWIFDVQNPDEVTVNSSKIKVKQRGPYTYR	253.48	3	752.695	0.54593									P26201	D	D	D	P26201		D	D
Platelet glycoprotein 4	205	K	N	VPYPITTTIGVFYPYNNTADGIYKVFNGKDD	150.31	3	1424.72	0.11024									P26201	D	D	D
Platelet-activating factor receptor	4	S	N	____________MEPNNSFRVDSEFRYTLFP	80.165	2	499.218	-0.65945									Q9TTY5	D	D	D
Platelet-activating factor receptor	169	S	N	VLDSTNREPNKTGSANITRCFEHYEKGSIPV	99.136	2	411.714	0.03619									Q9TTY5	D	D	D
Plexin-A1	77	K	N	EVYVGAVNRIYKLSGNLTLLRAHVTGPVEDN	98.044	2	495.297	0.17462	Q9UIW2		D		Q9UIW2	D	D
Plexin-B2	127	K	N	CGSLFKGICALRALSNISLRLFYEDGSGEKS	162.25	2	438.755	-0.18455	O15031	D	D	D	O15031	D	D
Plexin-B2	733	K	N	SGTFAFRTPKLSHDANETLPLHLYVKSYGKN	140.46	3	618.328	0.17267	O15031	D	D	D	O15031	D	D	D
Plexin-B2	1049	S	N	SLQPMTVVGTDYVFHNDTKVVFLSPAVPEEP	87.156	3	828.721	0.45271	O15031		D	D	O15031	D		D
Plexin-B2	528	S	N	SRSKSCVAVTSAQPQNMSRRAQGEVQLTVSP	198.16	2	827.874	-0.24032	O15031	D	D	D	O15031	D	D	D
Plexin-B2	759	S	N	SYGKNIDSKLHVTLYNCSFGRSDCSLCRAAN	145.55	3	490.575	-0.47559	O15031	D	D	D	O15031	D	D	D
Plexin-B2	127	U	N	CGSLFKGICALRALGNISTRLFYEDGSGEKS	89.355	2	417.732	0.13525													G3X755	D	D
Plexin-B2	1073	U	N	VVFLSPAVPEEPEAYNLTALIRMDGHQALLR	40.756	3	811.105	1.1209													G3X755	D	D
Plexin-B3	51	S	N	PPPLPLTGAHRFSAPNTTLNHLALAPGRGTL	105.31	3	594.984	-2.7872	Q9ULL4	D	D	D	Q9ULL4			D
Plexin-C1	919	U	N	ILCKIKGIKTASTIANSSKKVRVKLGNLELY	69.01	2	491.75	-1.1177	O60486	D		D
Plexin-C1	556	U	N	NVDTGRMLCKGKSAHNETCTCIIPTRTAYKD	130.72	3	554.92	0.004278									E1BDY7	D	D	D
Podocalyxin	360	S	N	EDLETQTQSEKQLVLNLTGNTLCAGGASDEK	168.79	2	1032.51	0.16012	O00592	D	D	D	O00592	D		D
Podocalyxin	277	U	N	LTNIGKIQCHPPEKLNESKLSLNISDANSCC	141.54	4	396.45	-0.71102									F1MLI8	D	D	D
Polycystin-2	299	K	N	EGSLLDGLYWKMQPSNQTEADNRSFIFYENL	42.809	2	698.793	-0.31809	Q13563	D	D		Q13563	D	D
Polycystin-2	305	K	N	GLYWKMQPSNQTEADNRSFIFYENLLLGVPR	42.809	2	698.793	-0.31809	Q13563	D	D
Polymeric immunoglobulin receptor	469	K	N	EIKIIEGEPNLKVPGNVTAVLGETLKVPCHF	204.18	4	607.317	-1.0227	P01833	D	D	D	P01833	D	D	D
Polymeric immunoglobulin receptor	499	K	N	FPCKFSSYEKYWCKWNNTGCQALPSQDEGPS	204.05	2	997.93	-0.52776	P01833	D	D	D	P01833	D	D	D
Polymeric immunoglobulin receptor	83	K	N	ISSEGYVSSKYAGRANLTNFPENGTFVVNIA	246.17	2	1407.17	-0.43984	P01833	D	D	D	P01833	D	D	D
Polymeric immunoglobulin receptor	421	K	N	KAQYEGRLSLLEEPGNGTFTVILNQLTSRDA	204.17	3	802.432	0.46619	P01833	D	D	D	P01833	D	D	D
Polymeric immunoglobulin receptor	186	K	N	LYPVLVIDSSGYVNPNYTGRIRLDIQGTGQL	218.07	2	1266.14	3.9267	P01833	D	D	D	P01833	D	D	D
Polymeric immunoglobulin receptor	135	K	N	SFDVSLEVSQGPGLLNDTKVYTVDLGRTVTI	232.54	2	1090.05	1.142	P01833	D	D	D
Polymeric immunoglobulin receptor	90	K	N	SSKYAGRANLTNFPENGTFVVNIAQLSQDDS	246.17	2	1407.17	-0.43984	P01833	D	D	D	P01833	D	D	D
Polymeric immunoglobulin receptor	468	S	N	ELKVVQGEPSLKVPKNVTAWLGEPLKLSCHF	160.67	2	777.942	0.079883									P81265	D	D	D	P81265	D	D	D
Polymeric immunoglobulin receptor	83	S	N	ISSEGYVSDDYVGRANLTNFPESGTFVVDIS	286.8	4	609.057	1.0852									P81265	D	D	D	P81265		D	D
Polymeric immunoglobulin receptor	420	S	N	KEQYEGRLALLTEPGNGTYTVILNQLTDQDT	110.09	3	1351.97	4.8144									P81265	D	D	D	P81265		D	D
Post-GPI attachment to proteins factor 3	40	S	N	REPVYRDCVLQCEEQNCSGGALNHFRSRQPI	164.68	2	1199	1.4117				D	Q96FM1	D	D	D
Pre-B-cell leukemia transcription factor-interacting protein 1	455	U	N	LQGLENWGQDPGVSANASKAWHQKSHFQNSR	220.34	2	987.476	0.36072	Q96AQ6	D	D	D	Q96AQ6	D	D	D
Prenylcysteine oxidase 1	196	K	N	KLLHALGGDDFLGMLNRTLLETLQKAGFSEK	151.7	2	872.95	0.47325	Q9UHG3	D	D	D	Q9UHG3	D	D	D
Prenylcysteine oxidase 1	353	K	N	QYYQHIVTTLVKGELNTSIFSSRPIDKFGLN	222.27	3	556.289	0.03888	Q9UHG3	D	D	D	Q9UHG3	D	D	D
Prenylcysteine oxidase 1	199	U	N	KLLHSLGGDDYLGLFNRSLLETLQKAGFSEK	149.57	3	598.309	-0.66413									A6QPR1	D	D	D
Prenylcysteine oxidase 1	356	U	N	QHYEPLVTTLIKGELNSTVFSSRALNEFHLG	90.793	2	600.293	0.65316									A6QPR1	D	D	D
Probable lysosomal cobalamin transporter	88	S	N	YMKNQNGTFKDWANANVSRQIEDTVLYGYYT	74.267	2	518.241	-0.71397	Q9NUN5	D	D	D	Q9NUN5		D	D
Pro-cathepsin H	101;101	K;S	N	SFAEIKHKYLWSEPQNCSATKSNYLRGTGPY	89.46	2	793.856	1.4416	P09668		D	D					Q3T0I2		D	D
Procollagen galactosyltransferase 1	381	S	N	EIACRLVEAVDGKAMNTSQVEALGIQMLPGY;EIECRLVEAVDGKAMNTSQVEALGIQMLPGY	88.565	2	1041.52	-0.61921					Q8NBJ5	D	D
Procollagen galactosyltransferase 1	96	K	N	RERTALWVATDHNMDNTSTVLREWLVAVKSL	149.34	3	716.681	-0.27458	Q8NBJ5	D	D	D	Q8NBJ5	D	D	D
Procollagen galactosyltransferase 1	97	S	N	RERTALWVATDHNADNTSAVLREWLVAVKGL	204.29	2	1029.51	0.70907									A5PK45	D	D	D
Procollagen-lysine,2-oxoglutarate 5-dioxygenase 1	197;196	S;S	N	FYTKIFLDPEKREQINITLDHRCRIFQNLDG	142.83	2	621.322	0.067591	Q02809	D	D	D	Q02809	D	D	D	O77588	D	D	D
Procollagen-lysine,2-oxoglutarate 5-dioxygenase 1	538	U	N	VFSNPEDWKEKYIHQNYTKALAGKLVETPCP	109.71	1	1069.52	0.5568	Q02809	D	D	D	Q02809		D
Procollagen-lysine,2-oxoglutarate 5-dioxygenase 2	696	S	N	VGEDFQGGGCKFLRYNCSIESPRKGWSFMHP	119.62	2	564.747	-0.15828					O00469		D	D
Procollagen-lysine,2-oxoglutarate 5-dioxygenase 3	63	S	N	ETEGYLRFLRSAEFFNYTVRTLGLGEEWRGG	120.09	2	618.793	0.31256	O60568	D	D	D	O60568	D	D	D
Procollagen-lysine,2-oxoglutarate 5-dioxygenase 3	548	S	N	IFDNPVDWKEQYIHENYSRALEGEGIVEQPC	104.07	2	671.301	1.0316	O60568	D	D	D	O60568	D	D	D
Procollagen-lysine,2-oxoglutarate 5-dioxygenase 3	76	U	N	ETEGYRRFLQSAEFFNYTVRTLGLGEEWRGG	136.99	2	812.898	0.61593									F1MET0	D	D	D
Procollagen-lysine,2-oxoglutarate 5-dioxygenase 3	561	U	N	IFDNPLDWKEQYIHENYTRALEGEGLVEQPC	113.63	2	678.309	-0.56275									F1MET0	D	D
Pro-epidermal growth factor	148	S	N	SNQQEGIITVTDMKGNNSHILLSALKYPANV	160.84	2	635.356	-0.24544	P01133				P01133	D	D	D
Pro-epidermal growth factor	104	S	N	YWVDLERQLLQRVFLNGSRQERVCNIEKNVS	139.92	2	398.216	0.56137	P01133	D	D	D	P01133			D
Prolactin-inducible protein	105	K	N	LCDDNPKTFYWDFYTNRTVQIAAVVDVIREL	151.83	2	708.311	0.13821	P12273	D	D	D
Proline synthase co-transcribed bacterial homolog protein	146	U	N	QRKGSPERLKVMVQINTSGEESKHGLPPSET	64.65	2	712.845	2.1043	O94903				O94903	D	D	D
Prolow-density lipoprotein receptor-related protein 1	3839	S	N	DINECLRFGTCSQLCNNTKGGHLCSCARNFM	205.12	2	716.808	-0.0070584	Q07954		D	D
Prolow-density lipoprotein receptor-related protein 1	2127;2162	K;U	N	DRTHANGSIKRGSKDNATDSVPLRTGIGVQL	89.992	3	454.896	0.67393	Q07954	D	D	D					E1BGJ0	D	D	D
Prolow-density lipoprotein receptor-related protein 1	2905	S	N	EAPKNPHCTSPEHKCNASSQFLCSSGRCVAE;EAPKNPHCTSQEHKCNASSQFLCSSGRCVAE	97.273	2	738.808	-0.20025	Q07954		D	D
Prolow-density lipoprotein receptor-related protein 1	3788;3788	K;U	N	EEDCSIDPKLTSCATNASICGDEARCVRTEK;EEDCSMDPKLTSCATNASICGDEARCVRTEK	144.33	2	864.874	-0.036583	Q07954	D	D	D					E1BGJ0	D
Prolow-density lipoprotein receptor-related protein 1	3953;3953	K;U	N	SNRHRRQIDRGVTHLNISGLKMPRGIAIDWV	117.79	3	381.22	-0.2534	Q07954	D		D					E1BGJ0	D	D	D
Prolow-density lipoprotein receptor-related protein 1	3089;3088	K;U	N	TDVTTQGSMIRRMHLNGSNVQVLHRTGLSNP	93.011	3	503.261	-0.44966	Q07954		D	D					E1BGJ0	D	D	D
Prolow-density lipoprotein receptor-related protein 1	1511;1510	K;U	N	WRTNTLAKANKWTGHNVTVVQRTNTQPFDLQ	98.353	2	650.338	0.1934	Q07954	D	D	D					E1BGJ0	D	D	D
Prolow-density lipoprotein receptor-related protein 1	4075	K	N	YWADAKLSVIGSIRLNGTDPIVAADSKRGLS	69.045	2	652.335	0.53688	Q07954		D	D
Prolow-density lipoprotein receptor-related protein 1	446	K	N	ANAQQKTSVIRVNRFNSTEYQVVTRVDKGGA	99.5	2	673.827	-0.081376	Q07954	D	D	D
Prolow-density lipoprotein receptor-related protein 1	114	S	N	MDGSDEGPHCRELQGNCSRLGCQHHCVPTLD	80.684	2	483.713	-0.16458	Q07954	D	D	D
Prolow-density lipoprotein receptor-related protein 1	3333	S	N	PTNFYLGSDGRTCVSNCTASQFVCKNDKCIP	107.46	2	832.852	1.044	Q07954	D		D
Prolow-density lipoprotein receptor-related protein 1	2521	S	N	RGGRILQDDLTCRAVNSSCRAQDEFECANGE	148.07	2	398.679	0.56471	Q07954	D	D	D
Prolow-density lipoprotein receptor-related protein 1	446	U	N	ANAQQKTSVIRVNRFNSTDYQVVTRVDKGGA	115.33	2	666.819	-0.066069									E1BGJ0	D	D	D
Prolow-density lipoprotein receptor-related protein 1	2520	U	N	RGGRILQDDFTCQAVNSSCRAQDEFECANGE	127.75	2	958.922	1.2543									E1BGJ0	D	D
Prolyl 3-hydroxylase 1	540	K	N	GQEGKVPLQSAHLYYNVTEKVRRIMESYFRL	104.45	3	588.973	-0.6512					Q32P28	D	D	D
Prominin-1	395	S	N	AGIKRVLNSIGSDIDNVTQRLPIQDILSAFS	131.86	2	817.418	0.63249	O43490	D	D	D	O43490	D	D	D
Prominin-1	220	S	N	LNETPEQIKYILAQYNTTKDKAFTDLNSINS	76.143	2	609.319	-0.087269	O43490	D	D	D
Prominin-1	274	S	N	MATAIKETKEALENMNSTLKSLHQQSTQLSS	91.313	2	626.802	0.47199	O43490	D	D	D	O43490	D	D	D
Prominin-1	586	U	N	ATLKLDHIYNVSEQLNITKHTGDINSNLENM	109.83	3	598.308	0.059454									E9LZ03	D		D
Prominin-1	361	U	N	DGLLQTDLSGLVQKANESLSNIPEEVQNQTR	68.525	2	967.957	-1.2973									E9LZ03		D	D	E9LZ03	D	D
Prominin-1	580	U	N	ENKGLYATLKLDHIYNVSEQLNITKHTGDIN	109.83	3	598.308	0.059454									E9LZ03	D		D
Prominin-1	373	U	N	QKANESLSNIPEEVQNQTRDFISEFKKTLNS	68.525	2	967.957	-1.2973									E9LZ03		D	D	E9LZ03	D	D
Prominin-2	540	U	N	LPPSMNLSQLLGLRKNISIHQAYQQCKEGAA	196.5	3	540.94	1.9358	Q8N271		D	D	Q8N271	D	D	D
Prosaposin	215	K	N	DCIQMVTDIQTAVRTNSTFVQALVEHVKEEC	288.41	2	1133.04	0.51206	P07602	D	D	D	P07602	D	D	D
Prosaposin	80	K	N	ICKDVVTAAGDMLKDNATEEEILVYLEKTCD	139.58	3	923.793	1.8152	P07602		D	D
Prosaposin	101	K	N	ILVYLEKTCDWLPKPNMSASCKEIVDSYLPV	163.8	2	907.394	1.2104	P07602	D	D	D	P07602	D	D	D
Prosaposin	332	K	N	VCEFLVKEVTKLIDNNKTEKEILDAFDKMCS	160.36	3	360.857	0.60683	P07602	D	D	D	P07602	D	D	D
Prosaposin	426	K	N	VCKKLVGYLDRNLEKNSTKQEILAALEKGCS	198.07	3	483.268	0.065074	P07602	D	D	D	P07602	D	D	D
Prostaglandin F2 receptor negative regulator	300	K	N	KNVSVAEGKELDLTCNITTDRADDVRPEVTW	79.633	2	727.34	1.5096	Q9P2B2	D	D	D	Q9P2B2	D	D
Prostaglandin F2 receptor negative regulator	618	K	N	KYIISLDQDSVVKLENWTDASRVDGVVLEKV	152.28	2	547.754	0.80165	Q9P2B2		D	D	Q9P2B2	D
Prostaglandin-H2 D-isomerase	51	By similarity	N	EDKFLGRWFTSGLASNSSWFLEKKKVLSMCK	186.85	3	664.331	0.14454									O02853	D	D	D	O02853		D
Prostaglandin-H2 D-isomerase	78	By similarity	N	SMCKSVVAPAADGGLNLTSTFLRKDQCETRT	260.96	3	631.339	0.1033									O02853	D	D	D	O02853	D	D	D
Protein CASC4	115	U	N	GLGKRCEDDKVKLQNNISYQMADIHHLKEQL	79.652	4	482.745	-0.16602	Q6P4E1		D	D	Q6P4E1		D	D
Protein CASC4	150	U	N	QEFLRQEDQLQDYRKNNTYLVKRLEYESFQC	128.38	2	491.776	0.20855					Q6P4E1	D	D	D
Protein disulfide-isomerase A3	90	U	N	KGIVPLAKVDCTANTNTCNKYGVSGYPTLKI	147.26	2	700.787	1.3149	P30101	D		D	P30101	D		D
Protein disulfide-isomerase TMX3	258	K	N	GDTGKLVALAVIDEKNTSVEHTRLKSIIQEV	153.74	3	666.697	-1.9251	Q96JJ7	D	D		Q96JJ7	D	D	D
Protein FAM234B	396	U	N	SDGVELLQMVKAPDSNCSNLLITTRQSLVLL	130.27	2	782.88	0.93669					A2RU67	D	D	D
Protein FAM3B	208	S	N	AKGLELPSEIQREKINHSDAKNNRYSGWPAE	132.32	2	522.764	-0.40515	P58499	D		D
Protein GPR107	169	S	N	LGQSQEPNVNPASAGNQTQKTQDGGKSKRST	141.74	2	1085.53	0.8818					Q5VW38	D	D	D
Protein HP-25 homolog 2	152	U	N	DIELFQHAVKLGLMKNDTQILEKESKAKDNY	142.77	2	482.248	0.61361									Q2KIU3		D	D
Protein HP-25 homolog 2	118	U	N	PIVFKEALHNDQDHFNLTTGVFTCTIPGVYR	208.12	3	1003.47	-0.044694									Q2KIU3	D		D
Protein O-glucosyltransferase 1	204	S	N	EDLVRSAAQWPWKKKNSTAYFRGSRTSPERD	82.426	2	495.25	0.10801	Q8NBL1	D	D	D	Q8NBL1	D	D	D
Protein O-glucosyltransferase 1	373	S	N	YWENLLTEYSKFLSYNVTRRKGYDQIVPKIL	81.594	2	501.761	1.0712	Q8NBL1	D	D	D	Q8NBL1	D	D
Protein O-mannosyl-transferase 1	471	K	N	DVWKTILSEVRFVHVNTSAVLKLSGAHLPDW	134.75	3	406.564	0.12249	Q9Y6A1	D	D		Q9Y6A1	D		D
Protein O-mannosyl-transferase 2	98	S	N	CWDETHFGKMGSYYINRTFFFDVHPPLGKML	86.794	2	503.731	-0.1237	Q9UKY4		D	D
Protein O-mannosyl-transferase 2	583	S	N	WHWPINYQGLRFSGVNDTDFRVYLLGNPVVW	100.88	2	580.759	0.31048	Q9UKY4	D	D	D	Q9UKY4	D	D	D
Protein OS-9	177;177	S;S	N	SKQHRLKRYHSQTYGNGSKCDLNGRPREAEV	213.84	3	415.519	-0.11822	Q13438	D	D	D	Q13438	D	D	D	Q3MHX6	D	D	D	Q3MHX6	D		D
Protein sel-1 homolog 1	608	K	N	AAFILDQREASIVGENETYPRALLHWNRAAS	131.06	2	734.346	1.112	Q9UBV2	D	D	D	Q9UBV2	D	D	D
Protein sel-1 homolog 1	431	K	N	LGKMYSEGSDIVPQSNETALHYFKKAADMGN	117.65	3	812.37	-1.2447	Q9UBV2	D	D	D	Q9UBV2	D	D	D
Protein sel-1 homolog 1	195	S	N	MQEAEMMYQTGMKILNGSNKKSQKREAYRYL	135.87	2	374.708	0.66133	Q9UBV2	D	D	D	Q9UBV2	D		D
Protein sel-1 homolog 1	217	S	N	QKREAYRYLQKAASMNHTKALERVSYALLFG	125.31	2	431.702	-0.39505	Q9UBV2	D	D	D
Protein tweety homolog 3	144	K	N	VAGVQDRVWDTAVGLNHTAEPSLQTLERQLA	55.588	3	780.729	-0.72132	Q9C0H2		D	D
Protein tweety homolog 3	144	U	N	VAGVQDRVWDTAAALNRTAEPSLQSLERQLA	110.14	2	560.288	0.04824									F1N1D4	D	D	D
Protein Wnt-5a	114	S	N	TGIKECQYQFRHRRWNCSTVDNTSVFGRVMQ	130.19	2	823.362	0.10766	P41221	D	D	D	P41221	D	D	D
Protein-lysine 6-oxidase	81	S	N	PQRRRDPGAAVPGAANASAQQPRTPILLIRD	91.725	3	612.978	-0.71201	P28300	D	D	D	P28300		D	D
Prothrombin	143	K	N	ECQLWRSRYPHKPEINSTTHPGADLQENFCR	175.77	4	679.318	-0.41662	P00734	D	D	D	P00734	D	D	D
Prothrombin	121	K	N	GNCAEGLGTNYRGHVNITRSGIECQLWRSRY	127.12	2	400.219	0.36284	P00734	D	D	D	P00734	D		D
Prothrombin	144	K	N	ECQLWRSRYPHKPEINSTTHPGADLRENFCR	139.7	2	1018.51	0.54268									P00735	D	D	D
Prothrombin	120	K	N	LEGNCAEGVGMNYRGNVSVTRSGIECQLWRS	113.89	2	368.198	0.10687													P00735	D	D
Protocadherin gamma-B2	545	S	N	LTLQARDQGSPALSANVSLRVLVGDLNDNAP	116.96	2	709.362	-0.94739	Q9Y5G2	D	D
Proton-coupled folate transporter	58;58	K;S	N	TTQYLWHRFSADLGYNGTRHRDSCSNHSVDP	114.86	2	602.28	0.21572	Q96NT5	D	D	D	Q96NT5	D	D	D					Q05B81	D	D	D
Pseudokinase FAM20A	70	S	N	RDSAAAASDPGTIVHNFSRTEPRTEPAGGSH	167.05	3	606.955	-0.48903	Q96MK3	D	D	D	Q96MK3	D	D	D
Putative uncharacterized protein A5D7Q2	474	U	N	TQKTIDRLAGKPTHVNVSVVMSEVDGVCY__	220.36	2	997.958	0.44101									A5D7Q2	D	D	D	A5D7Q2	D	D	D
Putative uncharacterized protein DKFZp686O16217	250	U	N	CPDGKSVTCHVKHYTNSSQDVTVPCRVPPPP	290.71	4	620.29	-0.35923	Q6N041	D	D	D	Q6N041	D	D	D
Putative uncharacterized protein DKFZp686O16217	485	U	N	TQKTIDRMAGKPTHINVSVVMAEADGTCY__	178.32	2	983.942	-5.4213	Q6N041	D	D	D	Q6N041	D	D	D
Receptor-type tyrosine-protein phosphatase C	531	S	N	ERYHLEVEAGNTLVRNESHKNCDFRVKDLQY	141	3	700.352	-0.7636	P08575		D	D
Receptor-type tyrosine-protein phosphatase C	421	K	N	HQGVITWNPPQRSFHNFTLCYIKETEKDCLN	114.72	2	716.844	-0.32801	P08575	D	D	D
Receptor-type tyrosine-protein phosphatase C	234	K	N	IATTPSKPTCDEKYANITVDYLYNKETKLFT	91.914	2	740.366	0.81381	P08575		D	D
Receptor-type tyrosine-protein phosphatase eta	231	S	N	ALTGVRKAALSWSNGNGTASCRVLLESIGSH	128.22	2	777.846	0.10596	Q12913	D	D	D	Q12913	D	D	D
Receptor-type tyrosine-protein phosphatase eta	142	S	N	AVSISPTNVILTWKSNDTAASEYKYVVKHKM	137.17	2	544.735	0.18332	Q12913	D	D	D
Receptor-type tyrosine-protein phosphatase eta	824	S	N	CTTGITDPPPPDGSPNITSVSHNSVKVKFSG	50.705	3	966.122	1.4387					Q12913	D	D
Receptor-type tyrosine-protein phosphatase eta	525	S	N	FPGTKYCFEIVPKGPNGTEGASRTVCNRTVP	129.16	2	474.717	0.35496	Q12913		D	D	Q12913		D	D
Receptor-type tyrosine-protein phosphatase eta	391	K	N	NISATSLTLIWKVSDNESSSNYTYKIHVAGE	122.97	2	750.311	0.079029	Q12913	D	D	D	Q12913	D	D	D
Receptor-type tyrosine-protein phosphatase eta	582	S	N	SEYVYHLVIESKHGSNHTSTYDKAITLQGLI	240.6	2	625.27	-0.089778	Q12913	D	D	D	Q12913		D	D
Receptor-type tyrosine-protein phosphatase eta	396	K	N	SLTLIWKVSDNESSSNYTYKIHVAGETDSSN	141.32	2	750.311	0.079029	Q12913	D	D	D	Q12913	D	D	D
Receptor-type tyrosine-protein phosphatase eta	104	S	N	SSGANDSLRTPEQGSNGTDGASQKTPSSTGP	182.7	2	740.326	-0.28127	Q12913	D	D	D	Q12913	D	D	D
Receptor-type tyrosine-protein phosphatase eta	413	K	N	TYKIHVAGETDSSNLNVSEPRAVIPGLRSST	189.37	3	643.313	-0.34953	Q12913	D	D	D	Q12913	D	D	D
Receptor-type tyrosine-protein phosphatase F	721	S	N	DVPSGPPRKVEVEPLNSTAVHVYWKLPVPSK	224.67	3	625.324	-0.084831	P10586	D	D	D	P10586	D	D	D
Receptor-type tyrosine-protein phosphatase F	966	K	N	YTVVFRDINSQQELQNITTDTRFTLTGLKPD	205.68	2	939.95	-0.2933	P10586		D	D	P10586	D	D	D
Reticulocalbin-1	53	K	N	VVRPDSELGERPPEDNQSFQYDHEAFLGKED	152.88	5	673.322	0.51935	Q15293	D	D	D	Q15293	D	D	D
Retinoic acid receptor responder protein 1	142	U	N	SARVFFKNQKPRPTINVTCTRLIEKKKRQQE	125.71	2	532.768	0.32895	P49788	D	D	D
Ribonuclease A F1	119	U	N	RVPLLHCDLINPGAQNISNCRYADRPGRRFY	92.993	3	765.38	-0.49772	W0UUR6	D	D	D
Ribonuclease K6	100	S	N	CKNRRHNCHQSSKPVNMTDCRLTSGKYPQCR	60.019	2	498.212	-0.10672	Q93091	D	D	D
Ribonuclease K6	55	S	N	QPSPLQCNRAMSGINNYTQHCKHQNTFLHDS	142.91	2	763.834	-0.7572	Q93091	D	D	D
Ribonuclease pancreatic	104	K	N	EKVTCKNGQGNCYKSNSSMHITDCRLTNGSR	147.96	3	437.517	-0.010505	P07998	D	D	D	P07998	D	D	D
Ribonuclease pancreatic	62	K	N	PSSSSTYCNQMMRRRNMTQGRCKPVNTFVHE	157.33	2	433.213	0.48379	P07998	D		D
Ribonuclease T2	212	K	N	GQIELCLTKQDQQLQNCTEPGEQPSPKQEVW	129.32	2	1043.97	-1.3593	O00584	D	D
RNASE2 protein	86	U	N	LHRTFAYVAGICNTPNVTCSKPGRMNCHNSS	308.02	3	773.701	-0.89487									A5PJY7	D	D	D
RNASE2 protein	110	U	N	MNCHNSSVQVPITFCNLTRNAMNYTNCRYGR	246.31	3	767.346	-0.35233									A5PJY7	D	D	D
RNASE2 protein	99	U	N	TPNVTCSKPGRMNCHNSSVQVPITFCNLTRP	189.47	2	1142.52	-0.22058									A5PJY7	D	D	D
RNASE2 protein	117	U	N	VQVPITFCNLTRPALNYTNCQYQQTRAWRIF	195.54	2	881.895	2.7909									A5PJY7	D	D	D
Scavenger receptor class B member 1	102	K	N	QEHGPYVYREFRHKSNITFNNNDTVSFLEYR;RERGPYVYREFRHKSNITFNNNDTVSFLEYR	112.74	3	769.034	2.8817	Q8WTV0	D		D	Q8WTV0	D		D
Scavenger receptor class B member 1	108	S	N	VYREFRHKSNITFNNNDTVSFLEYRSYQFQP;VYREFRHKSNITFNNNDTVSFLEYRTFQFQP	112.74	3	769.034	2.8817	Q8WTV0	D		D	Q8WTV0	D		D
Scavenger receptor cysteine-rich type 1 protein M130	1001;995	U;S	N	QGTGPIWLNEVKCKGNESSLWDCPARRWGHS;QGTGPIWLNEVKCKGNESSLWDCPARSWGHS	98.943	2	697.798	0.63611	Q86VB7	D	D	D					P85521		D	D
Scavenger receptor cysteine-rich type 1 protein M130	105	K	N	NQLGCPTAIKAPGWANSSAGSGRIWMDHVSC	71.933	2	610.781	-0.082232	Q86VB7	D	D	D
Scavenger receptor cysteine-rich type 1 protein M130	1027	K	N	RWGHSECGHKEDAAVNCTDISVQKTPQKATT	88.872	4	658.542	-0.016726	Q86VB7	D	D
Scavenger receptor cysteine-rich type 1 protein M130	140	K	N	SALWDCKHDGWGKHSNCTHQQDAGVTCSDGS	86.557	4	652.518	0.2614	Q86VB7	D	D
Scavenger receptor cysteine-rich type 1 protein M130	100	S	N	KQLGCPSVIKATGWTNSSAGTGRIWMDHVSC	93.649	2	634.791	0.015344									P85521	D	D	D
Scavenger receptor cysteine-rich type 1 protein M130	931	S	N	WITCADKIRLQEGTTNCSGRVEVWHGGSWGT	83.314	2	613.272	-0.39413									P85521	D	D	D
SCGB2A2 protein	72	U	N	KKAADELKQCFLQQSNETLANFKQMLQIIYD	216.46	2	915.932	-0.92579									A6QPK0	D	D	D	A6QPK0		D	D
Sclerostin domain-containing protein 1	47	S	N	LYSHVVKPVPAHPSSNSTLNQARNGGRHFSN	251.27	3	560.285	0.32732	Q6X4U4	D	D	D	Q6X4U4	D	D	D
Seipin	88	K	N	DCDSSTTSLCSFPVANVSLTKGGRDRVLMYG	135.91	2	1197.04	-1.4021	Q96G97	D	D	D	Q96G97	D	D	D
SEL1L ERAD E3 ligase adaptor subunit	654	U	N	AAFILDQREATIVGENETYPRALLHWNRAAS	89.231	2	741.354	0.349													F1MGJ5		D	D
Selenoprotein P	83	K	N	KLEDLRVKLKKEGYSNISYIVVNHQGISSRL	237.09	2	1065.02	0.10445	P49908	D	D	D	P49908	D	D	D
Selenoprotein P	174	By similarity	N	VEEAIKIAYCEKKCGNCSLTTLKDEDFCKRV	260.56	3	693.641	-1.2676	P49908	D	D	D	P49908	D	D	D
Selenoprotein P	83	U	N	RLEDLRVKLEKEGYSNISYVVVNHQGISSRL	67.168	3	704.68	1.0385									P49907	D	D	D	P49907		D	D
Semaphorin-3C	586;586	S;S	N	AYRNAAEIVQYGVKNNTTFLECAPKSPQASI	63.944	2	649.303	-0.38828					Q99985		D	D	A7MB70	D		D
Semaphorin-3C	585;585	S;S	N	KAYRNAAEIVQYGVKNNTTFLECAPKSPQAS	63.944	2	649.303	-0.38828					Q99985		D	D	A7MB70	D		D
Semaphorin-3C	465	S	N	GTDRGTVQKVVVLPTNSSARSELILEELEVF	81.017	2	573.324	0.82148									A7MB70	D	D	D	A7MB70	D	D
Semaphorin-3F	126	S	N	GNGECGNFVRLIQPWNRTHLYVCGTGAYNPV	115.3	2	465.258	0.49894	Q13275		D	D	Q13275	D	D
Semaphorin-3G	44	S	N	SVPRLRLSYRDLLSANRSAIFLGPQGSLNLQ	111.28	2	396.211	0.2219	Q9NS98	D	D	D	Q9NS98	D	D	D
Semaphorin-7A	256	U	N	FFREDNPDKNPEAPLNVSRVAQLCRGDQGGE	85.362	3	599.955	-0.55416									E1BNR9		D	D	E1BNR9	D	D
Serine protease 22	70	U	N	DSTDSEWPWIVSIQKNGTHHCAGSLLTSRWV	105.31	3	505.24	1.6395									E1BNJ9	D	D	D
Serine protease 23	93;93	S;S	N	YEEAKQYLSYETLYANGSRTETQVGIYILSS	102.28	2	834.394	0.44134	O95084		D	D	O95084				Q1LZE9			D
Serine protease 8	229	U	N	EPHVIDQDMLCAGYVNGSKDACQGDSGGPLS	141.47	3	764.017	0.23655									F1MUB9	D	D	D
Serine protease hepsin	112;112	K	N	RALTHSELDVRTAGANGTSGFFCVDEGRLPH	189.42	2	874.875	-0.27665	P05981	D	D	D	P05981	D	D		A1L5C6	D	D	D
Serotransferrin	432	K	N	IAGKCGLVPVLAENYNKSDNCEDTPEAGYFA	73.082	2	740.374	-0.26982	P02787	D		D	P02787	D	D
Serpin A3-2	100	S	N	ARGSTLTEILEGLKFNLTEIQEKEIHHSFQH	147.4	2	562.79	0.51706									A2I7M9	D	D	D
Serpin A3-2	230	S	N	FDPKHTEQAEFHVSDNKTVEVPMMTLDLETP	237.46	3	515.567	0.39338									A2I7M9	D	D	D	A2I7M9	D	D
Serpin A3-4	318	S	N	ELYLPKFSIKSNYELNDTLSQMGIKKIFTDA	218.6	2	866.403	0.11959									A2I7N0	D	D	D
Serpin A3-7	221	S	N	NYIFFKAQWKTPFNPNHTYESEFHVSQNERV	346.03	2	1218.54	0.98712									A2I7N3	D	D	D	A2I7N3	D	D
Serpin A3-8	103	U	N	ARGPTVTEILEGLKFNLTETPEREIHQGFQH	140.75	2	555.272	0.33747									A0A0A0MP89	D	D	D
Serpin H1	120	S	N	EEVHAGLGELLRSLSNSTARNVTWKLGSRLY	150.4	2	419.711	0.26054	P50454	D	D	D	P50454	D	D	D
SERPINA10 protein	303	U	N	DKKFHCHVLKLPYRGNASMLVVLVERIGDHL	105.03	2	645.852	-0.73879									A5PJ69		D	D
Serum amyloid P-component	51	K	N	TDHVNLITPLEKPLQNFTLCFRAYSDLSRAY	294.92	2	649.826	1.1142	P02743	D	D	D	P02743	D	D	D
Serum paraoxonase/arylesterase 1	253	K	N	AELLAHKIHVYEKHANWTLTPLKSLDFNTLV	201.48	2	592.321	0.96665	P27169	D	D		P27169	D	D	D
Serum paraoxonase/arylesterase 2	254	K	N	ILAHEIHVLEKHTNMNLTQLKVLELDTLVDN	178.53	3	401.541	-1.6913	Q15165	D	D	D	Q15165	D	D	D
Serum paraoxonase/arylesterase 2	254	S	N	ILAHEIHVLEKHPNMNLTQLKVLKLDTLVDN	87.184	2	599.81	0.44924									Q58DS7	D	D	D
SHBG protein	395	U	N	RSLNIWTHSCPQNPGNGSDTTH_________	250.86	2	1163.51	0.20822									A5PKC2	D	D	D
Sialic acid-binding Ig-like lectin 5	375	S	N	APSLCWRLEEKPLEGNSSQGSFKVNSSSAGP	78.932	2	876.93	-0.16027	O15389	D	D	D
Sialidase-1	352	K	N	HPEFRVNLTLRWSFSNGTSWRKETVQLWPGP	133.23	2	615.775	-0.044693	Q99519	D	D	D	Q99519		D	D
Sialomucin core protein 24	146	S	N	PSTTSKTVTTSGTTNNTVTPTSQPVRKSTFD	83.849	2	1033.02	0.51668	Q04900	D	D	D
Sialomucin core protein 24	96	S	N	TCFWIECKGKSYCSDNSTAGDCKVVNTTGFC	133.71	2	734.266	-0.10553									Q2YDH0	D	D	D	Q2YDH0	D	D
SID1 transmembrane family member 1	282	S	N	EDYACGGSFFIQEKENQTWNLQRKKNLEVTI	93.649	2	596.286	0.48428					Q9NXL6	D	D
Signal recognition particle receptor subunit alpha	44	U	N	VNALIRSVLLQERGGNNSFTHEALTLKYKLD	147.12	3	497.916	-0.082014									Q3MHE8	D	D	D
SIRPA protein	100	U	N	APFPRVTSVADATKRNNTDFSIRISNITPAD	158.47	2	563.28	0.23641													A6QPC6	D	D	D
SIRPA protein	110	U	N	DATKRNNTDFSIRISNITPADTGVYYCVKFR	96.163	2	902.44	-0.26889									A6QPC6	D	D	D	A6QPC6	D	D	D
Smoothened homolog	188	S	N	RFPEGCTNEVQNIKFNSSGQCEVPLVRTDNP	72.496	2	748.358	-0.81777	Q99835	D	D	D	Q99835	D
Sodium- and chloride-dependent creatine transporter 1	192	S	N	NTPDCVEIFRHEDCANATMANLTCDQLADRR	175.32	2	1156.47	-0.01403													O18875	D	D
Sodium- and chloride-dependent creatine transporter 1	197	S	N	VEIFRHEDCANATMANLTCDQLADRRSPVIE	175.32	2	1156.47	-0.01403													O18875	D	D
Sodium- and chloride-dependent neutral and basic amino acid transporter B(0+)	302	S	N	EGASKGISYYIGAQSNFTKLKEAEVWKDAAT	277.15	2	776.382	0.69845	Q9UN76	D	D	D	Q9UN76	D	D	D
Sodium- and chloride-dependent neutral and basic amino acid transporter B(0+)	155	S	N	LYYMFASFQSELPWKNCSSWSDKNCSRSPIV	170.95	2	753.79	-0.070331	Q9UN76	D	D	D	Q9UN76	D	D	D
Sodium- and chloride-dependent neutral and basic amino acid transporter B(0+)	189	S	N	NVSTVNKGIQEIIQMNKSWVDINNFTCINGS	142.43	2	596.81	2.5409	Q9UN76	D	D	D	Q9UN76	D	D	D
Sodium- and chloride-dependent neutral and basic amino acid transporter B(0+)	163	S	N	QSELPWKNCSSWSDKNCSRSPIVTHCNVSTV	170.95	2	753.79	-0.070331	Q9UN76	D	D	D	Q9UN76	D	D	D
Sodium- and chloride-dependent neutral and basic amino acid transporter B(0+)	174	S	N	WSDKNCSRSPIVTHCNVSTVNKGIQEIIQMN	296.22	2	779.893	0.35275	Q9UN76	D	D	D	Q9UN76	D	D	D
Sodium/glucose cotransporter 1	248	K	N	MEKYMKAIPTIVSDGNTTFQEKCYTPRADSF	147.36	2	862.435	-0.44736	P13866	D	D	D	P13866	D	D	D
Sodium/glucose cotransporter 1	248	U	N	VTKYMNAIPTVTSYGNTTIKAECYTPRADSF	91.457	2	940.46	0.82592									Q8MKB7	D	D	D	Q8MKB7	D	D	D
Sodium/hydrogen exchanger 1	75	K	N	VTTAPPEVTPESRPVNHSVTDHGMKPRKAFP	67.275	3	526.596	-0.041457	P19634	D	D	D
Sodium/iodide cotransporter	225	U	N	VMLVGGPRQVLTLAQNHSRINLMDFNPDPRS	100.69	2	635.343	1.1246	Q92911	D	D	D
Sodium/nucleoside cotransporter	642	U	N	CHHILENAFNSGLVRNTTNVVSCCQGLLSSA	202.07	2	1022	0.78047									F1MGR1	D	D	D	F1MGR1	D	D	D
Sodium/nucleoside cotransporter	670	U	N	SSAVVKGPGEVIPTGNHSLYSLKNCCNLLNT	179.74	3	591.309	-0.072353									F1MGR1	D	D	D	F1MGR1	D	D	D
Sodium/nucleoside cotransporter	689	U	N	YSLKNCCNLLNTPTLNCSWIPNVL_______	176.21	2	1203.56	-0.51759									F1MGR1	D	D	D	F1MGR1	D	D	D
Sodium/potassium-transporting ATPase subunit beta-3	207	S	N	TGKSESTAFLSTYPSNGTIDLKYFPYYGKKL	151.57	2	1017.49	0.42758									Q3T0C6	D	D	D	Q3T0C6	D	D
Sodium-dependent phosphate transport protein 2B	340;339	U	N	PSLCWTDGLYTWTIKNVTYKENIAKCQHIFV	105.2	2	591.816	-0.28234	O95436		D						Q27960		D	D	Q27960	D	D	D
Sodium-dependent phosphate transport protein 2B	320	S	N	FTNVTERNVTVPSPENCTSPSLCWTDGLYTW	154.69	2	1566.72	0.90992									Q27960			D	Q27960	D	D
Sodium-dependent phosphate transport protein 2B	294	U	N	KSILNQIAMNDESVQNKSMIKIWCKTFTNVT	285.65	3	610.288	5.8334									Q27960	D	D	D	Q27960	D	D	D
Sodium-dependent phosphate transport protein 2B	312	U	N	MIKIWCKTFTNVTERNVTVPSPENCTSPSLC	154.69	2	1566.72	0.90992									Q27960			D	Q27960	D	D
Sodium-dependent phosphate transport protein 2B	307	S	N	VQNKSMIKIWCKTFTNVTERNVTVPSPENCT	136.27	2	485.74	0.38157									Q27960	D	D	D	Q27960		D	D
Soluble Fc-gamma-RII-B isoform	79	U	N	DHVTLTCQGTSFSAGNLTTWFHNGSSIHTQK	376.96	4	892.661	-0.025268									A8DC35	D	D	D
Soluble Fc-gamma-RII-B isoform	179	U	N	FYQDRKSKIFSYQRTNFSIPRANLSHSGQYH	116.88	2	419.221	0.07369									A8DC35	D	D	D	A8DC35	D	D	D
Soluble Fc-gamma-RII-B isoform	105	U	N	IHTQKQPSYSFRAGSNDSGSYRCQREQTSLS	185.29	2	508.712	0.29729									A8DC35	D	D	D	A8DC35	D	D	D
Soluble Fc-gamma-RII-B isoform	186	U	N	KIFSYQRTNFSIPRANLSHSGQYHCTAFIGK	232.84	3	631.965	-1.626									A8DC35	D	D	D	A8DC35		D	D
Soluble Fc-gamma-RII-B isoform	86	U	N	QGTSFSAGNLTTWFHNGSSIHTQKQPSYSFR	376.96	4	892.661	-0.025268									A8DC35	D	D	D
Solute carrier family 15 member 2	472	U	N	LKTKSQDFHFHLKYHNLSLYTEHSVQEKNWY	322.73	4	463.476	0.0012863	Q16348	D	D	D	Q16348	D	D	D
Solute carrier family 15 member 2	435	U	N	NLADDEVKVTVVGNENNSLLIESIKSFQKTP	131.48	2	916.499	0.70104	Q16348	D	D	D	Q16348	D	D	D
Solute carrier family 15 member 2	480	U	N	LKTKSQNFHFQLKYHNVSVYTDHSVEEKIWY	263.99	4	453.21	-0.10836									F1MPK7	D	D	D
Solute carrier family 15 member 2	443	U	N	NLADDEVKVTVLGDENNTLLAESIKSFQNMP	169.61	2	909.983	0.040912									F1MPK7	D	D	D
Solute carrier family 15 member 4	140	U	N	APATRAALCGSARLLNCTAPGPDAAARCCSP	61.409	2	715.353	0.16157	Q8N697		D	D
Solute carrier family 2, facilitated glucose transporter member 1	45	K	N	TGVINAPQKVIEEFYNQTWVHRYGESILPTT	166.04	3	575.282	-0.5934	P11166	D	D	D	P11166			D
Solute carrier family 2, facilitated glucose transporter member 3	43	S	N	TGVINAPEAIIKDFLNYTLEERSEPPPSSVL	158.79	2	651.809	-0.17542									P58352	D	D	D	P58352	D	D
Solute carrier family 2, facilitated glucose transporter member 9	90	S	N	LSVVNAPTPYIKAFYNESWERRHGRPIDPDT	145.17	2	602.761	0.0064152	Q9NRM0	D	D	D	Q9NRM0	D	D	D
Solute carrier family 22 (Organic cation/carnitine transporter), member 5	57		N	FTATPEHHCRVPDTANLSSAWRNHSVPMRLQ	51.875	2	660.327	0.13775													Q2KJE9	D	D
Solute carrier family 28	664	U	N	SSTVAKGPGEVIPGGNHSLYSLKGCCTLLNP	111.22	2	864.446	0.15883	Q9HAS3	D	D	D	Q9HAS3	D	D	D
Solute carrier family 3 (Activators of dibasic and neutral amino acid transport), member 2	307	U	N	VQNLTNPSSFLAEWQNITKSVSEDRLLIAGT	148.2	2	1156.06	0.080155									Q5EA54	D	D	D	Q5EA54		D	D
Solute carrier family 3 (Activators of dibasic and neutral amino acid transport), member 2	294	U	N	WLQTGVDGFQVRDVQNLTNPSSFLAEWQNIT	148.2	2	1156.06	0.8835									Q5EA54	D	D	D	Q5EA54		D	D
Solute carrier family 7 member 4	151	U	N	AWSGYLDAMFDHRIQNFTEAHLGVWQVPFLA	137.05	3	743.728	0.048989									E1BCI3		D	D
Solute carrier organic anion transporter family member 4C1	544	U	N	GCSNPVAHRKPKVYYNCSCIERKTEITSTAE	173.32	2	683.786	-0.2675	Q6ZQN7	D	D	D	Q6ZQN7	D	D	D
Sortilin	98	U	N	DEECGRVRDFVAKLANNTHQHVFDDLRGSVS	90.444	3	561.609	-0.46726	Q99523	D		D	Q99523	D	D	D
Sortilin	406	K	N	DRHLYTTTGGETDFTNVTSLRGVYITSVLSE	193.06	3	706.007	-0.54262	Q99523	D	D	D	Q99523		D	D
Sparc/osteonectin, cwcv and kazal-like domains proteoglycan (Testican) 1	289	U	N	AIYLDKYEPCIKPLFNSCDSFKDGKLSNNEW	89.541	3	669.974	-0.21283									Q17QR9	D	D	D
SPARC-related modular calcium-binding protein 1	214	S	N	PTLWIKHLVIKDSKLNNTNIRNSEKVYSCDQ	94.262	2	424.23	0.38497	Q9H4F8	D	D	D	Q9H4F8	D	D	D
Sphingomyelin phosphodiesterase	503	U	N	YIGLNPGYRVYQIDGNYSRSSHVVLDHETYI	121.83	2	609.288	-1.1615	E9LUE6		D	D	E9LUE6	D	D
Stromal interaction molecule 1	171;169	K;S	N	KLQLSGHAMPRLAVTNTTMTGTVLKMTDRSH	115.8	2	726.897	0.2089	Q13586	D	D	D	Q13586	D	D	D	Q58CP9	D	D	D
Sulfatase-modifying factor 1	141;141	K;U	N	MDAYEVSNTEFEKFVNSTGYLTEAEKFGDSF	118.37	2	731.353	-0.88974	Q8NBK3	D		D	Q8NBK3	D	D	D	Q0P5L5	D		D
Sulfhydryl oxidase 1	575	S	N	AAPELAMGALELESRNSTLDPGKPEMMKSPT	112.08	2	725.844	-0.57753	O00391		D	D	O00391	D	D	D
Sulfotransferase	247	U	N	EIQKVERFLRLSPQINASNFYFNKTKGFYCL	94.728	2	823.409	-1.2311									Q0VCB5	D		D
SUN domain-containing ossification factor	530	U	N	AKTEDLTEGNKSISENATATAAPKMPESTPV	77.912	2	632.319	-0.3013	Q9UBS9		D		Q9UBS9	D	D	D
SUN domain-containing ossification factor	928	S	N	SVFMRLNNRIKALEVNMSLSGRYLEELSQRY	75.819	2	598.297	0.32056					Q9UBS9	D	D
SUN domain-containing protein 2	636	K	N	PTAVTLEHVPKALSPNSTISSAPKDFAIFGF	88.552	2	638.337	0.63503	Q9UH99	D	D	D	Q9UH99	D	D	D
Suppressor of tumorigenicity 14 protein homolog	772	S	N	GTGALILQKGEIRVINQTTCENLLPQQITPR	126	2	1064.55	-0.44198	Q9Y5Y6		D	D	Q9Y5Y6	D	D	D
Suppressor of tumorigenicity 14 protein homolog	772	S	N	GQGAMILQKGEIRVINQTTCEHLLPQQITPR	92.307	3	717.709	1.1342									Q0IIH7		D	D
Suppressor of tumorigenicity 14 protein homolog	489	S	N	WADCTDYSDELDCKCNATYQFTCRDKFCKPL	115.18	2	662.271	0.18163									Q0IIH7	D	D	D
Sushi domain-containing protein 2	494	U	N	TDLRVQARAQPGTMSNGTETRGTGLTAVAVQ	57.804	2	676.803	0.51712	Q9UGT4	D	D	D
Sushi domain-containing protein 2	162	S	N	VHPNKVSMMEKSELVNETRWQYYGTANTSGN	114.5	2	475.737	-0.38819	Q9UGT4	D	D	D
Sushi domain-containing protein 4	134	S	N	QEDCRIPQIEDAEIHNKTYRHGEKLIITCHE	68.809	3	470.577	5.4515	Q5VX71	D			Q5VX71	D		D
Synaptophysin-like protein 1	71	K	N	GQTEIQVNCPPAVTENKTVTATFGYPFRLNE	152.71	2	944.454	0.25214	Q16563	D	D	D	Q16563	D	D
Synaptophysin-like protein 1	96	U	N	PFRLNEASFQPPPGVNICDVNWKDYVLIGDY	131.54	2	1144.55	0.61861	Q16563		D	D
SYPL1 protein	95	U	N	PFRLNEASFQAPQGGNVCGVDWKNYVLIGDY	174.02	2	1090.5	0.52201									A8PVV5		D	D	A8PVV5	D		D
Tenascin	788	S	N	LAPGQEYEISLHIVKNNTRGPGLKRVTTTRL	198.98	4	618.575	-0.18069	P24821	D	D	D	P24821	D	D	D
Tenascin	166	S	N	ATGRLDTRPFCSGRGNFSTEGCGCVCEPGWK	180.64	2	974.381	0.5765	P24821	D	D	D	P24821	D	D	D
Tenascin	327	S	N	ELICPNDCFDRGRCINGTCYCEEGFTGEDCG	195.51	6	611.242	0.6428	P24821	D	D	D	P24821	D	D	D
Tenascin	1093	K	N	ENLTVTEVGWDGLRLNWTAADQAYEHFIIQV	276.89	3	1040.19	-5.1603	P24821	D	D	D	P24821	D		D
Tenascin	1119	S	N	FIIQVQEANKVEAARNLTVPGSLRAVDIPGL	130.24	3	495.947	-0.26197	P24821	D	D	D	P24821	D	D	D
Tenascin	1392	S	N	FVIQVQEVNKVEAAQNLTLPGSLRAVDIPGL	163.27	2	736.404	-0.19189	P24821	D	D	D	P24821	D	D	D
Tenascin	1366	K	N	GDLAVSEVGWDGLRLNWTAADNAYEHFVIQV	266.74	2	1296.63	-0.13538	P24821	D	D	D
Tenascin	38	S	N	GVLKKVIRHKRQSGVNATLPEENQPVVFNHV	176.48	2	1350.68	-0.2322	P24821	D	D	D	P24821	D	D	D
Tenascin	1485	K	N	IEIIDSNRLLETVEYNISGAERTAHISGLPP	205.61	2	798.904	-1.3412	P24821	D	D	D	P24821	D	D	D
Tenascin	1018	K	N	LLWKTPLAKFDRYRLNYSLPTGQWVGVQLPR	153.23	2	966.017	-0.60281	P24821	D	D	D	P24821	D	D	D
Tenascin	184	K	N	TEGCGCVCEPGWKGPNCSEPECPGNCHLRGR	262.05	2	943.877	-0.70261	P24821	D	D	D	P24821	D	D	D
Tenascin	1034	K	N	YSLPTGQWVGVQLPRNTTSYVLRGLEPGQEY	122.13	2	478.75	0.92982	P24821	D	D	D	P24821	D	D	D
Tenascin	1422	U	N	FVIQAQEANRVEAAQNLTVPGNMRAVDIPGL	77.078	2	751.88	-0.15451									F1MRZ6	D		D
Tenascin-C	68	U	N	GVSRSSVITNLKASSNYTAHLHGLIGGQRAQ	57.52	3	595.636	0.38957	Q99857		D	D
Tetraspanin-13	137	S	N	IQRNLNCCGFRSVNPNDTCLASCVKSDHSCS	151.44	2	784.352	0.50436	O95857	D		D	O95857	D	D	D
Tetraspanin-13	137	S	N	IQRNLNCCGFRSFNPNDTCLASCVKSSHPCS	130.24	2	808.352	-0.13253									Q3ZBV0	D	D	D	Q3ZBV0	D	D
Tetraspanin-15	189;189	S;S	N	PGPLACGVPYTCCIRNTTEVVNTMCGYKTID	110.92	2	760.336	0.17758	O95858	D	D	D	O95858	D	D		Q1JQA4	D	D	D
Tetraspanin-3	127;127	S;S	N	ENEVDRSIQKVYKTYNGTNPDAASRAIDYVQ	99.011	2	635.283	0.11709	O60637	D	D	D	O60637	D	D	D	Q3SZR9		D	D	Q3SZR9	D	D
Tetraspanin-6	134	S	N	KNSFKNNYEKALKQYNSTGDYRSHAVDKIQN	120.99	2	553.735	0.75292	O43657	D	D	D	O43657	D	D	D
TGF-beta receptor type-2	94	S	N	KPQEVCVAVWRKNDENITLETVCHDPKLPYH	55.094	3	639.303	1.1958					P37173	D	D	D
Thioredoxin domain-containing protein 16	460	S	N	TRINCADWSDVCTKQNVTEFPIIKMYKKGEN	83.869	2	596.329	0.19449	Q9P2K2	D	D	D	Q9P2K2	D	D	D
Thrombospondin-1	1067;1067	K;S	N	PTRAQGYSGLSVKVVNSTTGPGEHLRNALWH	168.61	3	457.237	0.72455	P07996	D	D	D	P07996	D	D	D	Q28178	D	D	D
Thrombospondin-1	360;360	S;S	N	VTICKKVSCPIMPCSNATVPDGECCPRCWPS	143.93	2	1205.5	0.67418	P07996	D		D	P07996	D		D	Q28178			D
Thrombospondin-1	1085	S	N	TGPGEHLRNALWHTGNTSGQVRTLWHDPRHI	171.36	2	772.379	0.34626									Q28178	D	D	D
Thrombospondin-3	407	S	N	VGSFKCGPCRLGFLGNQSQGCLPARTCHSPA	61.097	2	810.906	-0.74348	P49746	D		D	P49746		D
Thy-1 cell surface antigen	42	U	N	ACLVNQSLRLDCHHENTTTTPIQYEFSLTRD	237.61	3	856.064	1.3287									Q3SX33	D	D	D
Thy-1 cell surface antigen	93	U	N	TKFFSKYNLKVLYLSNFTTKDEGIYTCELRL	161.65	3	809.066	-1.4983									Q3SX33	D	D	D	Q3SX33	D	D	D
Thy-1 cell surface antigen	31	U	N	VARGQKVTSLTACLVNQSLRLDCHHENTTTT	219.97	3	522.28	-0.1114									Q3SX33	D	D	D	Q3SX33	D	D	D
Thyroxine-binding globulin	34	S	N	NSCEGKITSCLSPQQNATLYKMSSINADFAF	142.97	2	863.932	-0.040451									Q9TT36	D	D	D
Tissue factor	156	S	N	GQPTIQSFEQVGTKVNVTVEDERTLVRRNNT	168.83	2	532.261	0.42547	P13726	D	D	D	P13726	D	D	D
Tissue-type plasminogen activator	483	K	N	VRLYPSSRCTSQHLLNRTVTDNMLCAGDTRS	173.37	2	566.277	-0.31715	P00750	D	D	D	P00750	D	D	D
TM2 domain containing 1	195	U	N	IIDYYGTRLTRLSITNETFRKTQLYP_____	100.02	2	542.282	-0.21507													Q2KI73		D	D
TM2 domain-containing protein 3	157	U	N	TSCMTVSCPRQRYPANCTVRDHVHCLGNRTF	115.78	3	423.208	-0.37917					Q9BRN9		D	D
TMEM106B protein	223	U	N	QVQFSKTVIGKARLNNISIIGPLDMKQIDYT	121.56	2	715.894	0.44998	Q8N353	D	D	D
Toll-like receptor 1	137	S	N	SFNAFDALPICKEFGNMSQLKFLGLSTTHLE	93.649	2	528.749	-0.24021	Q15399	D		D	Q15399	D	D	D
Toll-like receptor 1	163	K	N	TTHLEKSSVLPIAHLNISKVLLVLGETYGEK	73.927	3	461.269	-0.56793	Q15399	D	D	D
Toll-like receptor 2	414	K	N	LASLEKTGETLLTLKNLTNIDISKNSFHSMP	183.72	2	510.777	-0.064159	O60603	D	D	D	O60603	D	D	D
Toll-like receptor 2	199	K	N	SDLQSYEPKSLKSIQNVSHLILHMKQHILLL	155.98	4	381.463	-0.38166	O60603	D	D	D	O60603	D	D	D
Toll-like receptor 2	442	K	N	SMPETCQWPEKMKYLNLSSTRIHSVTGCIPK	138.54	2	478.75	-0.054064	O60603	D	D	D	O60603	D	D	D
Toll-like receptor 2	114	S	N	LRNLEYLDLSYNRLSNLSSSWFRSLYVLKFL	143.89	2	600.301	0.16065									Q95LA9	D	D	D	Q95LA9		D	D
Toll-like receptor 2	199	S	N	QNLQIYVPKSLKSIQNISHLILHLKQPILLV	162.88	2	759.948	1.6956									Q95LA9	D	D	D
Toll-like receptor 2	442	S	N	SMPETCQWPGKMKQLNLSSTRIHSLTQCLPQ	79.059	2	461.248	-0.99583									Q95LA9	D	D	D	Q95LA9	D	D	D
Toll-like receptor 3	247	K	N	QLGPSLTEKLCLELANTSIRNLSLSNSQLST	141.89	2	646.842	-0.27053	O15455	D	D	D	O15455	D		D
Toll-like receptor 3	70	K	N	VLNLTHNQLRRLPAANFTRYSQLTSLDVGFN	113.71	2	446.742	-0.24467	O15455	D	D	D	O15455	D		D
Toll-like receptor 4	173	K	N	AHNLIQSFKLPEYFSNLTNLEHLDLSSNKIQ	187.43	3	779.721	1.0799					O00206	D		D
Toll-like receptor 4	282	K	N	GNLEKFDKSALEGLCNLTIEEFRLAYLDYYL	163.23	2	877.929	1.9973	O00206	D	D	D	O00206	D	D	D
Toll-like receptor 4	238	S	N	FKEIKLNGLTLRSNFNSSHVMKTCIQGLAGL	89.266	2	577.263	-0.19454									Q9GL65	D	D	D	Q9GL65		D	D
Toll-like receptor 4	73	S	N	MLDLSFNYLRHLGSHNFSSFPELQVLDLSRC	163.62	3	762.718	-0.02121									Q9GL65	D	D	D
Toll-like receptor 4	282	S	N	RKLQRFDRSFLEGLCNLTIEQFRIAYLDKFS	136.81	2	915.453	0.10053									Q9GL65	D	D	D
Toll-like receptor 4	526	S	N	VAQTAFHSLSSLQVLNMSHNKLLSLDTFLYE	211.3	4	744.117	-0.00055407									Q9GL65	D	D	D
Toll-like receptor 5	46	K	N	AFYRFCNLTQVPQVLNTTERLLLSFNYIRTV	133.71	2	963.474	0.93429	O60602	D	D	D
Toll-like receptor 5	422	K	N	DIFLSGNKLVTLPKINLTANLIHLSENRLEN	212.24	2	805.941	-0.48382	O60602	D	D	D
Toll-like receptor 5	37	K	N	PSCSFDGRIAFYRFCNLTQVPQVLNTTERLL	133.71	2	963.474	0.93429	O60602	D	D	D
Toll-like receptor 8	285	S	N	CDGGASINIDRFAFQNLTQLRYLNLSSTSLR	76.143	2	620.832	-0.81464	Q9NR97		D	D
Toll-like receptor 8	42	S	N	EENFSRSYPCDEKKQNDSVIAECSNRRLQEV	75.483	3	508.572	0.28407	Q9NR97	D	D	D
Toll-like receptor 8	293	K	N	IDRFAFQNLTQLRYLNLSSTSLRKINAAWFK	68.893	2	578.808	-0.35941	Q9NR97		D	D
Torsin-1A	158	K	N	NITLYKDQLQLWIRGNVSACARSIFIFDEMD	130.22	2	419.192	-0.031984	O14656	D	D	D	O14656	D	D	D
Torsin-1A-interacting protein 1	399	K	N	EKLWKRSQTFLEKHLNSSHPRSQPAILLLTA	158.07	2	475.738	0.28665	Q5JTV8	D	D	D	Q5JTV8		D	D
Torsin-1A-interacting protein 2	286	S	N	SFLWQRGRKFLQKHLNASNPTEPATIIFTAA	244.46	2	1014.03	-0.20844	Q8NFQ8	D	D	D	Q8NFQ8	D	D	D
Torsin-1B	64	S	N	IYCRFAECCREERPLNASALKLDLEEKLFGQ	103.44	2	615.832	0.12298	O14657	D	D	D	O14657	D	D	D
Torsin-2A	149	S	N	HIERYKKDLKSWVQGNLTACGRSLFLFDEMD	97.439	2	676.319	-0.076616	Q5JU69	D	D	D	Q5JU69	D	D	D
Torsin-4A	314;303	U;U	N	LSGAGGAEVTRFVLQNASRALPLRPDGFRSA	107.01	2	469.253	0.44573	Q9NXH8	D	D	D					G3X7J5	D	D	D	G3X7J5		D	D
Transcobalamin 1	363	U	N	KGSVFLDVMKAAQEKNETLFRFTVEETSWGP	136.02	3	437.226	0.43983									E1BCU6		D	D	E1BCU6		D	D
Transcobalamin 1	47	U	N	NFWRLEPLINTMLNANYTKGTLGLNVLLTLR	139.58	2	869.453	-0.30385									E1BCU6	D	D
Transcription factor AEBP1	504	U	N	GIKGVVTDEQGIPIANATISVSGINHGVKTA	109.68	3	860.457	0.29376									O97567	D	D	D
Transferrin receptor	727	K	N	LLENLKLRKQNNGAFNETLFRNQLALATWTI	82.543	2	707.336	0.31052	P02786	D	D	D
Transferrin receptor	239	U	N	NFGTKQDFEDLNMPVNGSLVIVRAGKISFAE	212.55	2	1025.01	1.1513									E1BIG6		D	D
Transforming growth factor beta receptor 3	533	U	N	EGDTSFFSRLEIVVFNCSLRQVGNPRTFQDE	124.12	2	676.86	1.2401									E1B9H5	D	D	D
Transforming growth factor beta receptor 3	454	U	N	GMELTLLDPTCKAKTNDTHFILESPLNGCGT	89.049	3	679.982	-0.7704									E1B9H5	D	D	D
Transforming growth factor beta-1	176	U	N	KLKVEQHVELYQKYSNNSWRYLSNRLLAPSD	132.29	2	465.204	-0.60213	P01137	D	D
Transforming growth factor beta-2	140	S	N	PYFRIVRFDVSAMEKNASNLVKAEFRVFRLQ	99.566	3	552.611	-0.63284					P61812	D	D
Transient receptor potential cation channel, subfamily V, member 2	566	U	N	SLSREPQDTGAPAGSNTTEVAGKEDKEAPYR	94.632	2	916.923	-0.27504									Q5EA32		D	D
Translocon-associated protein subunit alpha	136;136	K;S	N	DASFRYPQDYQFYIQNFTALPLNTVVPPQRQ	194.21	3	1006.84	5.6578	P43307	D	D	D	P43307	D	D	D					A6QLP7	D	D	D
Translocon-associated protein subunit alpha	191	K	N	NYKDLNGNVFQDAVFNQTVTVIEREDGLDGE	116.21	3	794.732	-1.944					P43307	D		D
Translocon-associated protein subunit beta	88;88	K;S	N	SGMLNVKWDRIAPASNVSHTVVLRPLKAGYF	192.85	4	452.019	0.34505	P43308	D	D	D	P43308	D	D	D	Q5E9E4	D	D	D	Q5E9E4	D	D	D
Transmembrane 9 superfamily member	174;172	K;U	N	KKLEIGFNGNRIVDVNLTSEGKVKLVPNTKI	85.288	2	589.313	0.61165	Q9HD45	D	D		Q9HD45	D	D	D	E1BMF1	D	D	D
Transmembrane and TPR repeat-containing protein 4	497	U	N	AKVHYNIGKNLADKGNQTAAIRYYREAVRLN	147.18	2	687.865	-1.007					Q5T4D3	D	D	D
Transmembrane and TPR repeat-containing protein 4	78	U	N	GDLWHHDFWGSRLSSNTSHKSYRPLTVLTFR	109.21	2	438.719	0.42875	Q5T4D3	D	D	D
Transmembrane emp24 domain-containing protein 4	131	S	N	FTSHTPGDHQICLHSNSTRMALFAGGRLRVH	256.13	3	816.041	0.064395	Q7Z7H5	D	D	D	Q7Z7H5	D	D	D	A4FV10	D	D	D	A4FV10	D	D	D
Transmembrane emp24 domain-containing protein 9	125;125	K;S	N	FTSHTPGEHQICLHSNSTKFSLFAGGMLRVH	256.11	2	1216.56	2.1637	Q9BVK6	D	D	D	Q9BVK6	D	D	D	Q3T133	D	D	D	Q3T133	D	D	D
Transmembrane glycoprotein NMB	249	K	N	DQIPVFVTMFQKNDRNSSDETFLKDLPIMFD	139.89	3	476.888	1.5656	Q14956	D	D	D	Q14956	D	D	D
Transmembrane glycoprotein NMB	275	K	N	PIMFDVLIHDPSHFLNYSTINYKWSFGDNTG	101.47	3	999.165	-0.54248	Q14956	D	D
Transmembrane protease serine 2	249	S	N	KAVVSLRCIACGVNLNSSRQSRIVGGESALP	71.176	2	677.31	-1.5742	O15393	D	D	D	O15393		D	D
Transmembrane protease serine 2	213	S	N	QGIVDDSGSTSFMKLNTSAGNVDIYKKLYHS	130.07	3	475.921	2.2768	O15393	D	D	D	O15393	D	D	D
Transmembrane protease serine 2	211	U	N	QGIADDSGATSFMKLNISANDIDLYKKLYHS	93.011	2	691.358	-1.0482									A2VDV7	D	D		A2VDV7	D	D
Transmembrane protein 131	290	U	N	TKGVMRASFSSREADNHTAFIRIKTNASDST	77.379	2	588.78	0.23631	Q92545	D		D	Q92545	D	D	D
Transmembrane protein 2	980	U	N	VGRMDNYLIRHPSCVNVSKWNAVICSGTYAQ	96.143	2	515.747	0.23232	Q9UHN6	D	D
Transmembrane protein 2	292	U	N	AKILEIERFDTHEFQNESRRLQKFLRDQDPG	119.76	3	471.537	0.50739									F1MNY2	D	D	D	F1MNY2		D	D
Transmembrane protein 2	248	U	N	HGTQKASWTLLVRTLNSSGLTFGSYAFKKDF	126.88	2	798.396	0.70471													F1MNY2	D	D	D
Transmembrane protein 2	980	U	N	VGRMDNYLIRHPSCINVTKWNAVVCSGSYAQ	108.43	2	529.763	0.10699									F1MNY2	D	D		F1MNY2		D	D
Transmembrane protein 245	551	K	N	EWITHKLHKILGDKVNNTAVIEKQVLELWDR	144.18	2	495.771	0.36188	Q9H330	D	D	D	Q9H330	D	D	D
Transmembrane protein 259	45	U	N	DKWPREGILRVEVQHNSSRAPVFLQFCDGGH	101.65	2	529.759	0.29426									G3MZ69	D	D	D	G3MZ69			D
Transmembrane protein 8A	232	U	N	DYTRELLLELRDCVSNGSLGCPVRLTVGPVT	113.65	2	712.313	-0.064648	Q9HCN3	D	D	D	Q9HCN3	D	D	D
Transmembrane protein 8A	535	U	N	SCSCKAGWRGWSCTDNSTAQTVAQQRAATLL	121.19	2	956.921	0.54815					Q9HCN3	D	D
Transporter	164	U	N	RELPWSKCSISWADGNCSRSPFVTHCNVSIS	135.6	2	708.282	-0.51331									A5D7H9	D	D	D	A5D7H9	D		D
Tripeptidyl-peptidase 1	443	K	N	KFLSSSPHLPPSSYFNASGRAYPDVAALSDG	135.09	3	685.334	-0.065607	O14773	D	D	D	O14773	D	D	D
Trophoblast glycoprotein	81	S	N	CECSEAARTVKCVNRNLTEVPTDLPAYVRNL	104.17	2	795.917	0.71516	Q13641	D		D
Trophoblast glycoprotein	124	K	N	GAFARRPPLAELAALNLSGSRLDEVRAGAFE	89.913	2	834.47	-1.364	Q13641	D	D	D
Trophoblast glycoprotein	275	S	N	LESLHLEDNALKVLHNGTLAELQGLPHIRVF	151.8	4	468.515	-0.20811	Q13641	D	D	D	Q13641	D	D	D
Tubulointerstitial nephritis antigen-like	161	K	N	MIKAINQGNYGWQAGNHSAFWGMTLDEGIRY	164.79	3	999.459	-0.53548	Q9GZM7	D	D	D
Tubulointerstitial nephritis antigen-like	163	U	N	MIEAINHGDYGWRAGNHSAFWGMTLDEGIRY	137.27	3	622.289	-0.17007									E1B9H1		D	D
Tumor necrosis factor ligand superfamily member 13	124	S	N	QKQKKQHSVLHLVPINATSKDDSDVTEVMWQ	209.13	4	848.182	-1.3797	O75888	D	D	D	O75888	D	D	D
Tumor necrosis factor receptor superfamily member 11B	152	S	N	ERNTVCKRCPDGFFSNETSSKAPCRKHTNCS	258.23	2	817.854	0.79591	O00300	D	D	D	O00300	D	D	D
Tumor necrosis factor receptor superfamily member 11B	98	S	N	CSPVCKELQYVKQECNRTHNRVCECKEGRYL	133.89	2	735.351	-0.22088					O00300		D	D
Tumor necrosis factor receptor superfamily member 11B	165	S	N	FSNETSSKAPCRKHTNCSVFGLLLTQKGNAT	292.82	2	874.966	-0.16497	O00300	D	D	D	O00300	D	D	D
Tumor necrosis factor receptor superfamily member 11B	178	K	N	HTNCSVFGLLLTQKGNATHDNICSGNSESTQ	273.78	2	961.905	-0.36329	O00300	D	D	D	O00300	D	D	D
Tumor necrosis factor receptor superfamily member 11B	289	S	N	IDLCENSVQRHIGHANLTFEQLRSLMESLPG	184.03	3	513.604	-0.023903	O00300	D	D	D	O00300	D	D	D
Tumor necrosis factor receptor superfamily member 1A	54	S	N	KRDSVCPQGKYIHPQNNSICCTKCHKGTYLY	146.67	2	819.368	-0.0093571	P19438	D	D	D	P19438	D	D	D
Tumor necrosis factor receptor superfamily member 1A	54	S	N	KRESPCPQGKYNHPQNSTICCTKCHKGTYLY	99.669	2	813.35	1.8103									O19131	D	D	D	O19131		D	D
Tumor necrosis factor receptor superfamily member 3	177	S	N	KGNNHCVPCKAGHFQNTSSPSARCQPHTRCE	67.997	3	454.881	-0.040043	P36941	D	D	D
Tumor necrosis factor receptor superfamily member 5	180	S	N	TSCETKDLVVQQAGTNKTDVVCGPQDRLRAL	65.842	2	588.311	0.62885	P25942	D	D		P25942	D	D	D
Tumor necrosis factor receptor superfamily member 6	118	K	N	RCRLCDEGHGLEVEINCTRTQNTKCRCKPNF	207.79	2	952.922	0.36992	P25445	D	D	D	P25445	D	D	D
Tumor-associated calcium signal transducer 2	168	S	N	HILIDLRHRPTAGAFNHSDLDAELRRLFRER	200.6	5	434.02	-0.41193	P09758		D	D	P09758	D	D	D
Tyrosine-protein phosphatase non-receptor type substrate 1	245;246	K;S	N	AHVTLQGGPPLRGTANLSETIRVPPTLEITG	195.36	2	532.777	-0.16469	P78324	D	D	D	P78324	D	D	D	O46631	D	D	D	O46631		D	D
Tyrosine-protein phosphatase non-receptor type substrate 1	110	U	N	DLTKRNNMDFSIRIGNITPADAGTYYCVKFR	95.347	2	873.419	-1.54	P78324	D	D	D	P78324	D	D	D
Tyrosine-protein phosphatase non-receptor type substrate 1	292	K	N	KFYPQRLQLTWLENGNVSRTETASTVTENKD	158.11	2	768.395	1.881	P78324	D	D	D	P78324	D	D	D
Tyrosine-protein phosphatase non-receptor type substrate 1	270	K	N	TLEVTQQPVRAENQVNVTCQVRKFYPQRLQL	218.06	2	710.84	-0.66363	P78324	D	D	D	P78324	D	D	D
Tyrosine-protein phosphatase non-receptor type substrate 1	110	U	N	DATKRNNMDFSIRISNITPADAGVYYCVKFR	104.45	2	887.434	-0.13998									O46631	D	D	D	O46631	D	D
Tyrosine-protein phosphatase non-receptor type substrate 1	92	S	N	EFIYSQKEAPFPRVTNVSDATKRNNMDFSIR	107.79	3	365.196	1.1095									O46631	D	D	D	O46631	D	D	D
Tyrosine-protein phosphatase non-receptor type substrate 1	292	S	N	KFYPRHLQLTWLENGNMSRTEAASVFVENKD	150.26	2	852.911	1.3937									O46631	D	D	D	O46631	D
Tyrosine-protein phosphatase non-receptor type substrate 1	344	S	N	LTCQVEHDGQPAVSKNHTLEVSAPQKDQDTG	130.44	2	613.817	0.093642									O46631	D	D		O46631			D
Tyrosine-protein phosphatase non-receptor type substrate 1	270	S	N	PTLEITGSPSAGNQVNVTCQVNKFYPRHLQL	157.73	3	871.774	0.17885									O46631	D	D	D	O46631		D	D
Tyrosine-protein phosphatase non-receptor type substrate 1	167	S	N	VLSGPTVRATPEQTVNFTCTSHGFSPRNISL	178.66	3	713.993	1.0605									O46631	D	D	D	O46631	D		D
Tyrosine-protein phosphatase non-receptor type substrate 1	290	U	N	VNKFYPRHLQLTWLENGNMSRTEAASVFVEN	163.27	2	852.911	1.3937									O46631	D	D	D	O46631	D
UNC84B protein	647	U	N	PTAVTLEHVPKSLSPNSTISSAPKDFAIFGL	80.96	2	646.335	0.77482													A6QLV1	D	D	D
Uncharacterized protein E1BCU8	74	U	N	GKGNVDSVVTYHLSGNSSASHGDNHYKDRAR	70.569	4	662.802	-0.11744									E1BCU8		D	D	E1BCU8		D	D
Uncharacterized protein E1BCU8	188	U	N	WINKTDNSVLDSALQNNTVSLNARGLYDVVS	182.34	2	1068.03	0.2247									E1BCU8		D	D
Uncharacterized protein E1BIW1	179	U	N	PQHLRLQDPAPPVQANFTLRAVTSAHSGTYR	102.38	2	835.443	1.1571									E1BIW1	D	D	D
Uncharacterized protein F1MDC1	607	U	N	AEGNQNQGKMVEVVQNQSKKADGTPNQGKKA	113.44	2	590.792	0.56726									F1MDC1	D	D	D
Uncharacterized protein F1MDC1	785	U	N	KSGSKKKGEPGPPDANGTLHLPYKTLVSAVG	139.11	3	631.991	-0.16402									F1MDC1	D	D	D
Uncharacterized protein F1MGC2	117	U	N	VQVPITFCNLTRNAMNYTNCRYGRTRARKIF	97.965	2	573.731	0.026969									F1MGC2	D	D	D
Uncharacterized protein F1MI18	869	U	N	RTVSWAVTPKSLGEVNFTATAEALRSQELCG	87.932	2	791.404	0.52462									F1MI18		D	D
Uncharacterized protein F1MK01	120	U	N	SEMSRELVVLKEELWNVSTSVQEYQEEQKTQ	253.1	2	1115.01	-0.20781									F1MK01	D	D	D
Uncharacterized protein F1MYF5	108;105	S;U	N	AYDLCAKNKYHVLHINTTKNNPVMSLQDQVR	108.7	3	410.224	-1.4856									F1MYF5		D	D	F1MYF5	D	D	D
Uncharacterized protein F1MYX9	578	U	N	AEIDGAKNELQRKLSNLSNLSHDLVQEAVDH	269.01	3	741.041	-0.62431									F1MYX9	D	D	D
Uncharacterized protein F1MYX9	742	U	N	AQQRLGQSQLITAEANKTTMEVQEATAPMAS	94.09	2	688.369	-0.18331									F1MYX9	D	D	D
Uncharacterized protein F1MYX9	531	U	N	HEKQHERVREQTEGVNASLRTSSNSLMMPRL	78.692	2	603.796	0.52777									F1MYX9	D	D	D
Uncharacterized protein F1MYX9	787	U	N	SAYNTAVDSARDAVGNLTEVVPQLLDQLRTV	145.69	2	992.036	1.144									F1MYX9	D	D	D
Uncharacterized protein G3MX06	76	U	N	LSASLGDRVSITCQANQSVSHYLNWYQQKPG	316.4	3	1046.17	0.64718									G3MX06	D	D	D	G3MX06	D	D	D
Uncharacterized protein G3MXR2	322	U	N	LTFAKDMQRPGSWKFNATELILQGLLKHMFK	183.79	2	731.924	-0.54987									G3MXR2	D	D		G3MXR2		D	D
Uncharacterized protein G3MXR2	1218	U	N	PYQVVIYEEFLRLTKNGTQLQNFTLDRNSLL	125.82	2	706.843	0.12262													G3MXR2	D	D	D
Uncharacterized protein G3MXR2	1224	U	N	YEEFLRLTKNGTQLQNFTLDRNSLLVDGYSP	125.82	2	706.843	0.12262													G3MXR2	D	D	D
Uncharacterized protein G3N033	46	U	N	IAASLGESISITCRANQSISDYLSWYKQKPG	117.92	2	789.372	0.15702													G3N033	D	D	D
Uncharacterized protein G3N0V0	174	U	N	VEVHTARTKPREEQFNSTYRVVSALPIQHQD	207.47	2	829.905	0.49942									G3N0V0	D	D		G3N0V0	D	D
Uncharacterized protein G3N2D8	229	U	N	DTLETLASEGAQAFYNGSLTTQIVKDIQEAG	264.97	3	948.818	4.0979									G3N2D8	D	D	D
Uncharacterized protein G3N2D8	336	U	N	FAYAKRTLLGDPKFVNVTEVVRNMTSEFFAA	168.27	2	533.295	-0.52472									G3N2D8	D	D	D	G3N2D8		D	D
Uncharacterized protein G3N2D8	510	U	N	KQAVEEPRLHNQLLPNTTVLEKGIDQAVVAA	254.45	2	811.954	0.12922									G3N2D8	D	D	D	G3N2D8	D	D	D
Uncharacterized protein G3N2D8	343	U	N	LLGDPKFVNVTEVVRNMTSEFFAAQLWARIS	115.78	2	837.895	0.3907									G3N2D8	D	D	D
Uncharacterized protein G3N2D8	119	U	N	NAREVAPRLASAGMFNSSEQSEEGGLSVAVP	256.85	2	1363.15	0.88544									G3N2D8		D	D	G3N2D8	D		D
Uncharacterized protein G3N2R7	63	U	N	MYEEEQITSRKTNALNFTEVTTDKTGLYHCS	62.357	3	528.938	0.65624									G3N2R7	D	D	D
Uncharacterized protein G3N342	92	U	N	EFTCRVLHAETNSNLNKTISTECAKNFSDPS	181.98	2	671.846	-0.66632									G3N342	D	D	D
Uncharacterized protein G3N342	245	U	N	SPKITCLVVDLANEKNLSLTWSRANGKPVHA	88.819	2	490.258	0.42532									G3N342		D	D
Uncharacterized protein G3X6I0	1699	U	N	VQDCGCTHDGRYLPVNSSLLTSDCSQRCSCS	110.38	2	921.943	-1.432									G3X6I0	D	D
Uncharacterized protein G3X7F3	309	U	N	KIGCSQPPQIDHGTINSSSSAEERLYAHGTK	77.681	3	825.043	-0.77652									G3X7F3	D	D	D
Uncharacterized protein G5E6Q9	165	U	N	DVFILTKEDGDHVTQNQSSVPHDGGRQTIFL	122.22	4	510.224	-0.9439									G5E6Q9	D	D	D
UPF0454 protein C12orf49	67	S	N	DHDQPIPWKVQFNLGNSSRPSNQCRNSIQGK	70.942	2	562.783	-2.8663									Q17QN8	D	D	D
UPF0577 protein KIAA1324	404	S	N	TNNSTCQPCPYGSYSNGSDCTRCPAGTEPAV	75.868	3	844.654	0.8353	Q6UXG2	D	D	D	Q6UXG2	D	D	D
UPF0577 protein KIAA1324	390	U	N	LEQLNEQFNWVSRLANLTQGEDQYYLRVTT_;LEQLNEQFNWVSRLANLTQGEDQYYLRVTTV	266.85	2	843.915	-0.16174	Q6UXG2	D	D	D	Q6UXG2		D	D
UPF0577 protein KIAA1324	717	U	N	SLCGNQGRKMSVCTDNVTDLRIPEGESGFSK	171.05	2	707.315	-0.63402	Q6UXG2	D	D	D	Q6UXG2	D	D	D
Urokinase plasminogen activator surface receptor	179	S	N	CGILPGCPGPTGFHNNHTFHFLRCCNTTKCN	92.29	4	674.818	0.50832									Q05588		D	D
Vanin 2	294	U	N	GPKNSFRGCISRDEFNFTKLSESAGNLTVCQ	116.73	1	903.398	0.40423									A5D9D1	D	D
Vanin 2	304	U	N	SRDEFNFTKLSESAGNLTVCQKELCCHLSYR	128.31	2	705.345	-0.17162									A5D9D1	D	D	D	A5D9D1	D	D
Vanin 2	216	U	N	WAMGMRVNLLAANTHNVSLKMTGSGIYAPHS	130.66	3	499.615	0.38709													A5D9D1	D	D
Vanin 2	97	U	N	YVVANMGDKKPCNSHNTTCPSNGHYQYNTNV	205	4	793.849	-0.10676									A5D9D1	D	D	D
Vascular non-inflammatory molecule 2	411	K	N	REYWQVCTLLKCKTTNLTTCGRPVETASTRF	74.12	3	623.307	0.047619	O95498	D	D	D	O95498	D	D
Vasorin	117	K	N	LSNLDLTANRLHEITNETFRGLRRLERLYLG	98.249	3	421.547	-0.74409	Q6EMK4	D		D
Vitamin K-dependent protein Z	289	K	N	LRVTHVEPAECGRALNATVTTRTSCERGAAA	90.629	2	475.264	0.30315									P00744	D	D	D	P00744	D	D	D
Vitronectin	169	K	N	ELCSGKPFDAFTDLKNGSLFAFRGQYCYELD	116.37	4	843.659	1.4463					P04004		D	D
Vitronectin	86	K	N	PEDEYTVYDDGEEKNNATVHEQVGGPSLTSD	367.78	2	1192.58	0.44669	P04004	D	D	D	P04004	D	D	D
Voltage-dependent calcium channel subunit alpha-2/delta-1	136	S	N	EVVYYNAKDDLDPEKNDSEPGSQRIKPVFIE	138.57	2	902.89	0.39799	P54289	D	D	D	P54289	D	D	D
Voltage-dependent calcium channel subunit alpha-2/delta-1	998	S	N	FDNDSKSFSGVLDCGNCSRIFHGEKLMNTNL	115.34	2	731.303	-0.76095	P54289	D	D	D	P54289	D	D	D
Voltage-dependent calcium channel subunit alpha-2/delta-1	675	S	N	FIAPRDYCNDLKISDNNTEFLLNFNEFIDRK	172.6	2	1102.52	-0.41475	P54289		D	D
Voltage-dependent calcium channel subunit alpha-2/delta-1	824	S	N	PAVVGIKIDVNSWIENFTKTSIRDPCAGPVC	177.83	2	734.864	0.68296	P54289	D	D	D	P54289	D	D	D
Voltage-dependent calcium channel subunit alpha-2/delta-1	895	S	N	PSLMRHLVNISVYAFNKSYDYQSVCEPGAAP	183.79	3	470.918	-0.24851	P54289	D	D	D	P54289	D	D	D
Voltage-dependent calcium channel subunit alpha-2/delta-1	324	S	N	QANVRNKKVLKDAVNNITAKGITDYKKGFSF	131.53	2	474.748	0.14793	P54289	D	D	D	P54289	D	D	D
Voltage-dependent calcium channel subunit alpha-2/delta-1	888	S	N	RFFGEIDPSLMRHLVNISVYAFNKSYDYQSV	183.79	3	470.918	-0.24851	P54289	D	D	D	P54289	D	D	D
Voltage-dependent calcium channel subunit alpha-2/delta-1	781	S	N	RSLDNDNYVFTAPYFNKSGPGAYESGIMVSK	169.25	2	955.938	0.80638	P54289	D	D	D	P54289	D	D	D
Voltage-dependent calcium channel subunit alpha-2/delta-1	985	S	N	SKQSCITEQTQYFFDNDSKSFSGVLDCGNCS	147.09	2	1057.45	0.38411	P54289			D	P54289	D	D
V-set domain-containing T-cell activation inhibitor 1	112	U	N	FRGRTAVFADQVIVGNASLRLKNVQLTDAGT	129.05	2	832.449	1.2554	Q7Z7D3	D		D
V-type immunoglobulin domain-containing suppressor of T-cell activation	128	S	N	LAQRHGLESASDHHGNFSITMRNLTLLDSGL	143.14	4	500.48	0.92975	Q9H7M9	D		D	Q9H7M9	D	D
V-type proton ATPase subunit S1	261	K	N	QKQPVSPVIHPPVSYNDTAPRILFWAQNFSV	102.37	3	693.025	-0.57612	Q15904	D	D	D	Q15904	D	D	D
V-type proton ATPase subunit S1	170	S	N	SPLHVDLATLRELKLNASLPALLLIRLPYTA	128.67	2	648.91	-0.55816	Q15904	D		D	Q15904	D	D	D
V-type proton ATPase subunit S1	404	S	N	SLWQMTFRDFQIQAFNVTDKKFSYASDCAGF	133.16	2	778.896	-0.41042									P40682	D	D	D	P40682	D	D	D
Xanthine dehydrogenase/oxidase	11	U	N	_____MTADKLVFFVNGRKVVEKNADPETTL	117.93	2	477.768	-0.015062	P47989	D	D	D	P47989	D	D	D
Xanthine dehydrogenase/oxidase	11	U	N	_____MTADELVFFVNGKKVVEKNADPETTL	87.001	2	692.848	-0.68737													P80457	D	D	D
Zinc transporter ZIP14	77	K	N	LKALLNHLDVGVGRGNVTQHVQGHRNLSTCF	150.09	2	618.31	0.03332	Q15043	D	D	D
Zinc-alpha-2-glycoprotein	109	K	N	EDIFMETLKDIVEYYNDSNGSHVLQGRFGCE	243.09	3	691.316	-0.60641	P25311		D	D
Zinc-alpha-2-glycoprotein	112	K	N	FMETLKDIVEYYNDSNGSHVLQGRFGCEIEN	243.09	3	691.316	-0.60641	P25311	D	D	D
Zinc-alpha-2-glycoprotein	128	K	N	GSHVLQGRFGCEIENNRSSGAFWKYYYDGKD	164.96	2	572.739	-0.59964	P25311	D	D	D	P25311		D	D
Zinc-alpha-2-glycoprotein	125	S	N	GSHTFQGAFGCELRNNESSGAFWGYAYDGQD	220.36	2	1137.98	0.10003									Q3ZCH5	D	D	D

## Sheet: Sheet2
Table S2. MFGM N-glycoproteins conserved in human and bovine colostrum and mature milk.
No.	Protein name	Amino acid	Positions within proteins	m/z	Mass error [ppm]	Uniprot Acession	Intensity HC_1	Intensity HC_2	Intensity HC_3	Uniprot Acession	Intensity HM_1	Intensity HM_2	Intensity HM_3	Uniprot Acession	Intensity BC_1	Intensity BC_2	Intensity BC_3	Uniprot Acession	Intensity BM_1	Intensity BM_2	Intensity BM_3
1	Adipocyte plasma membrane-associated protein	N	160	713.859	0.079568	Q9HDC9	D	D	D	Q9HDC9	D	D	D
		N	196	914.443	0.71537	Q9HDC9	D	D	D	Q9HDC9	D	D	D
		N	159	727.874	-0.11528									Q3T0E5	D	D	D	Q3T0E5	D	D	D
2	Alpha-1-acid glycoprotein 1	N	103	390.193	-0.31098	P02763	D	D	D
		N	93	640.3	-0.27889	P02763	D	D	D	P02763		D	D
		N	94	597.264	-0.51782									Q3SZR3	D	D	D	Q3SZR3	D	D
		N	136	673.321	0.32383									Q3SZR3	D	D	D
3	Alpha-2-HS-glycoprotein	N	156	887.921	0.66058	P02765	D	D	D	P02765	D	D	D
		N	156	872.418	-0.51078									P12763	D	D	D	P12763	D		D
		N	99	1225.59	-0.30282									P12763	D	D	D
		N	176	1008.19	4.5536									P12763	D	D	D
4	Alpha-lactalbumin	N	93	1005.4	1.2962									P00711	D	D	D	P00711	D	D	D
		N	90	564.233	0.27268	P00709	D	D	D	P00709	D	D	D
5	Apolipoprotein D	N	98	1363.7	0.10309	P05090	D	D	D	P05090	D	D	D
		N	65	775.336	0.78118	P05090	D	D	D	P05090	D	D	D
		N	71	775.336	0.78118	P05090	D		D	P05090	D	D	D
		N	65	622.297	0.93014									Q32KY0	D	D	D	Q32KY0	D	D	D
		N	98	1144.04	-1.2526									Q32KY0		D	D
6	Attractin	N	416;403	661.328	-0.10685	O75882		D		O75882	D	D	D	Q8MJ16	D	D	D
		N	300;287	505.726	0.18313	O75882	D	D	D	O75882		D	D
		N	914;900	594.032	-0.43521	O75882	D	D		O75882	D	D	D	Q8MJ16	D	D	D	Q8MJ16	D	D	D
		N	923;909	791.707	0.4566	O75882	D	D		O75882	D	D	D	Q8MJ16	D	D	D	Q8MJ16	D	D	D
		N	1073	577.757	0.07832	O75882	D	D	D	O75882	D	D	D
		N	1198	578.776	0.4909	O75882		D	D
		N	264	1024.41	1.4383	O75882		D	D
7	Azurocidin	N	140	1301.19	1.6153	P20160	D	D	D
		N	126	1301.19	1.6153	P20160	D	D	D
		N	171	1390.17	-0.29522	P20160	D	D	D	P20160	D	D	D
		N	154	1163.57	-0.23227									G3N2H4	D	D
		N	140	1163.57	-0.23227									G3N2H4	D	D
		N	185	1343.69	0.67896									G3N2H4	D	D	D	G3N2H4	D		D
8	Basigin	N	160	663.998	0.68839	P35613	D	D	D	P35613	D	D	D
		N	268	878.401	-4.2104	P35613	D	D	D	P35613	D	D	D
		N	44	594.633	-1.5602									Q3ZBX0	D	D	D	Q3ZBX0	D	D	D
		N	152	856.889	0.15569									Q3ZBX0	D	D	D
9	Beta-2-glycoprotein 1	N	253	635.278	-1.0185	P02749	D	D	D	P02749	D	D	D
		N	162	737.869	1.2366	P02749	D	D	D	P02749	D	D	D
		N	183	840.37	0.20485	P02749	D	D	D	P02749	D	D	D
		N	193	840.37	0.20485	P02749	D	D	D	P02749	D	D	D
		N	253	642.782	0.28557									P17690	D	D	D	P17690	D	D	D
		N	162	1078.54	0.53214									P17690	D	D	D	P17690		D	D
		N	92	768.392	0.8392									P17690	D	D	D	P17690	D	D
		N	183	1125.48	-1.7342									P17690		D	D
		N	193	1125.48	-1.7342									P17690		D	D
10	Butyrophilin subfamily 1 member A1	N	55	720.372	1.2029	Q13410	D	D	D	Q13410	D	D	D
		N	215	892.947	-2.0634	Q13410	D	D	D	Q13410	D	D	D
		N	55	702.874	-0.80339									P18892	D	D	D	P18892	D	D	D
		N	215	487.212	-0.88755									P18892	D	D	D	P18892	D	D	D
11	Carcinoembryonic antigen-related cell adhesion molecule 1	N	378	815.954	0.24223	P13688	D	D	D	P13688	D	D	D
		N	363	814.901	-1.1529	P13688	D	D	D	P13688	D	D	D
		N	351	854.405	0.74956	P13688	D	D	D	P13688	D	D	D
		N	152	745.846	0.58984	P13688	D	D	D
		N	345	854.405	0.74956	P13688	D	D	D	P13688	D	D	D
		N	197	454.234	0.12597	P13688	D	D	D	P13688	D	D	D
		N	195	454.234	0.12597	P13688	D	D	D	P13688		D	D
		N	287	928.446	1.5576									Q6VAN8	D	D	D	Q6VAN8	D	D	D
		N	205	1027.46	0.98751									Q6VAN8	D	D	D
		N	201	527.295	0.090038									Q6VAN8	D	D	D	Q6VAN8		D	D
		N	101	969.514	-1.0217													Q6VAN8	D	D	D
		N	108	969.514	-1.0217													Q6VAN8	D	D	D
12	Cation-dependent mannose-6-phosphate receptor	N	83	799.905	0.43709	P20645	D	D	D	P20645	D	D	D
		N	85	792.897	0.026537									P11456	D	D	D	P11456	D	D
13	Cation-independent mannose-6-phosphate receptor	N	1312	424.174	-0.33432	P11717	D	D	D	P11717	D	D	D
		N	581	1043.56	0.09632	P11717	D	D	D	P11717	D	D	D
		N	112	737.339	1.5205	P11717	D	D	D	P11717		D
		N	120	714.85	-0.5227									P08169		D	D
		N	2220	433.217	0.1096									P08169	D	D	D	P08169		D	D
14	CD151 antigen	N	159	1263.54	-0.10326	P48509	D	D	D	P48509	D	D	D
		N	159	870.359	-1.4362									Q3ZBH3	D	D	D	Q3ZBH3		D	D
15	CD63 antigen	N	130	572.286	-0.51405	P08962	D	D	D	P08962	D	D	D
		N	129	572.286	0.12102	P08962	D	D	D	P08962	D	D	D
		N	150	707.637	0.41134	P08962	D	D		P08962	D	D	D
		N	172	852.722	-0.98998	P08962	D		D
		N	130	805.401	-0.28149									Q9XSK2	D	D	D	Q9XSK2	D	D	D
		N	171	779.362	0.40369									Q9XSK2	D	D	D	Q9XSK2	D	D
		N	150	934.853	-0.54122									Q9XSK2	D	D	D
16	Ceramide synthase 2	N	19;19	922.477	-0.1407	Q96G23	D		D	Q96G23	D	D	D	Q3ZBF8	D	D	D	Q3ZBF8		D	D
17	Choline transporter-like protein 2	N	200	531.782	-0.73777	Q8IWA5	D	D	D	Q8IWA5	D	D	D
		N	187	642.291	0.018576	Q8IWA5	D	D	D	Q8IWA5	D	D	D
		N	417;417	814.841	-0.18578	Q8IWA5	D	D	D	Q8IWA5	D	D	D	A5D7H3	D	D	D
		N	187	957.954	-2.3021									A5D7H3	D	D		A5D7H3	D	D
		N	397	663.318	0.068795									A5D7H3	D	D	D	A5D7H3	D	D
		N	200	602.837	1.1067									A5D7H3	D	D	D
18	Clusterin	N	86	603.814	0.59883	P10909	D	D	D	P10909	D	D	D
		N	354	811.058	5.8498	P10909	D	D	D	P10909	D	D	D
		N	103	980.463	-1.1628	P10909	D	D	D	P10909	D	D	D
		N	374	843.915	-0.839	P10909	D	D	D	P10909	D	D	D
		N	145	1189.55	0.021979	P10909	D		D	P10909	D	D
		N	291;283	474.216	0.70896	P10909	D	D	D	P10909	D	D	D	P17697	D	D	D	P17697	D	D	D
		N	346	497.28	0.27066									P17697	D	D	D	P17697	D	D	D
		N	320	579.312	1.9178									P17697	D	D	D
		N	80	1192.61	-0.038126									P17697	D	D	D	P17697	D	D	D
		N	97	872.388	-1.319									P17697	D	D	D
		N	366	1248.36	-1.2373									P17697	D	D	D
19	CD82 antigen/Tetraspanin	N	198	569.763	-0.24232	P27701	D	D	D	P27701	D	D	D
		N	129	874.061	-1.1437	P27701			D	P27701		D	D
		N	199	579.263	0.34404									A5D7E6	D	D	D	A5D7E6
		N	127	956.45	-0.1456													A5D7E6		D	D
20	Disintegrin and metalloproteinase domain-containing protein 10	N	278;278	861.415	1.6121	O14672	D	D	D	O14672	D	D	D	Q10741	D	D	D	Q10741		D	D
21	Dolichyl-diphosphooligosaccharide--protein glycosyltransferase subunit STT3A	N	548;548	950.974	0.29146	P46977	D	D	D	P46977	D	D	D	Q2KJI2	D	D	D	Q2KJI2	D	D	D
		N	544	952.468	4.5523					P46977		D	D
22	Dolichyl-diphosphooligosaccharide--protein glycosyltransferase subunit STT3B	N	616	1033.95	-0.018669	Q8TCJ2	D	D		Q8TCJ2	D	D
		N	627;623	700.692	-0.082633	Q8TCJ2	D	D	D	Q8TCJ2	D	D	D	A5D7G6	D	D	D	A5D7G6	D		D
		N	641;637	596.258	0.75646	Q8TCJ2	D	D	D	Q8TCJ2	D	D	D	A5D7G6	D	D	D	A5D7G6	D	D
23	Ephrin-A1	N	26;26	660.317	0.20579	P20827	D	D	D	P20827	D	D		Q3ZC64	D	D	D	Q3ZC64	D	D	D
24	Fibronectin	N	528	1100.49	0.035421	P02751		D	D	P02751	D	D	D
		N	542;543	703.296	-0.1152	P02751	D	D	D	P02751	D	D	D	P07589	D	D	D
		N	430	1070.11	0.66812					P02751		D	D
		N	529	1071.49	2.3558									P07589	D	D	D	P07589	D	D	D
25	Folate receptor alpha	N	69	1255.54	0.44004	P15328	D	D	D	P15328	D	D	D
		N	161	926.426	-1.822	P15328	D	D	D	P15328	D	D	D
		N	35	648.315	0.063566	P15328	D	D	D	P15328	D	D	D
		N	87	575.567	-0.32804	P15328	D	D	D	P15328	D	D	D
		N	63	1255.54	0.44004					P15328	D	D
		N	63	830.054	-0.28641									E1BJL8	D	D	D	E1BJL8	D	D	D
		N	57	552.909	1.1665									E1BJL8	D	D		E1BJL8	D	D	D
		N	115	461.219	-0.026924									E1BJL8	D	D	D	E1BJL8	D	D	D
		N	68	532.897	2.106									P02702	D	D	D	P02702	D	D
		N	160	851.869	5.0195									P02702	D	D	D	P02702	D	D	D
26	Galectin-3-binding protein	N	69	1350.69	0.26938	Q08380	D	D	D	Q08380	D	D	D
		N	551	639.327	0.379	Q08380	D	D	D	Q08380	D	D	D
		N	580	836.427	0.46979	Q08380	D	D	D	Q08380	D	D	D
		N	398	705.361	0.54351	Q08380	D	D	D	Q08380	D	D	D
		N	125	612.774	-0.45655	Q08380	D	D	D	Q08380	D	D	D
		N	192	1048.96	-0.36853					Q08380	D	D	D
		N	521	645.351	1.2688									A7E3W2	D	D	D	A7E3W2	D	D	D
		N	125	550.254	-0.39717									A7E3W2		D	D
27	Granulins	N	530	571.709	-0.40747	P28799	D	D	D	P28799	D	D	D
		N	236	947.624	-1.0138	P28799	D	D	D
		N	265	554.785	0.043121	P28799	D	D	D	P28799	D	D	D
		N	260	504.261	0.0076356									Q2HJI6	D	D	D
		N	524	729.773	-0.88114									Q2HJI6	D	D	D	Q2HJI6		D	D
28	Haptoglobin	N	241	899.503	0.7126	P00738	D	D	D	P00738	D	D	D
		N	207	732.859	-0.70937	P00738	D	D	D	P00738	D	D	D
		N	211	732.859	-0.70937	P00738	D	D	D	P00738	D	D	D
		N	184	894.798	2.0135	P00738	D	D	D
		N	286	698.325	0.45503									Q2TBU0	D	D	D	Q2TBU0	D	D	D
		N	316	420.875	0.31643									Q2TBU0	D	D	D
29	Hypoxia up-regulated protein 1	N	515	598.824	0.65503	Q9Y4L1	D	D	D	Q9Y4L1	D	D	D	E1B748	D	D	D	E1B748		D	D
		N	862	575.295	0.4221	Q9Y4L1	D	D	D	Q9Y4L1	D	D	D
		N	931	758.854	0.38886	Q9Y4L1	D	D	D	Q9Y4L1	D	D	D
		N	830	911.469	0.61382	Q9Y4L1	D	D	D	Q9Y4L1	D	D	D	E1B748	D	D	D
		N	869	474.748	0.1886	Q9Y4L1	D	D	D	Q9Y4L1	D	D	D
		N	596	1019.93	-0.15099	Q9Y4L1	D	D	D	Q9Y4L1	D	D	D
		N	931	775.857	0.16987									E1B748	D	D	D	E1B748		D	D
		N	869	482.745	0.59655									E1B748		D	D
30	Integrin alpha-M	N	1021	802.91	-0.33665	P11215	D	D	D
		N	900	618.282	0.38201	P11215	D	D	D	P11215	D	D
		N	946	704.822	-0.13463	P11215	D	D	D
		N	940	704.822	-0.13463	P11215	D	D	D
		N	391	494.736	-0.33614	P11215	D	D	D
		N	978	741.866	1.1637	P11215	D	D
		N	1021	746.86	-4.1099									Q24LN2	D	D	D	Q24LN2		D	D
		N	734	927.836	0.67518									Q24LN2	D	D	D
		N	1050	655.303	-0.37396													Q24LN2		D	D
		N	58	625.272	-0.35058									Q24LN2	D	D	D	Q24LN2	D	D	D
		N	801	510.285	0.12133									Q24LN2		D	D
		N	696	952.71	1.3714									Q24LN2		D	D
		N	999	993.806	-0.085377									Q24LN2	D	D	D
31	Integrin beta-2	N	212	791.883	0.58108	P05107	D	D	D	P05107		D	D
		N	213	791.883	0.39501	P05107		D	D
		N	50	696.338	0.31463	P05107	D	D	D
		N	501	814.353	-0.11732	P05107	D	D	D
		N	642	916.929	0.046137	P05107	D	D	D
		N	501	853.879	-0.58242									P32592	D	D	D	P32592	D		D
		N	50	718.849	0.52792									P32592	D	D	D	P32592	D		D
32	Immunoglobulin J chain	N	67	718.723	0.50209	P01591		D	D	P01591	D	D	D
		N	112	1415.6	2.4819	P01591		D	D	P01591		D	D
		N	71	616.306	0.49353	P01591	D	D	D	P01591	D	D	D
		N	112	1335.89	3.8265									Q3SYR8	D		D
		N	71	625.284	-0.023839									Q3SYR8	D	D	D	Q3SYR8	D		D
33	Kininogen-1	N	294	719.337	0.92167					P01042		D	D
		N	205	708.85	0.5197	P01042		D	D	P01042	D		D
		N	169	773.367	0.49499									P01044	D	D		P01044		D	D
		N	168	773.367	0.49499									P01044	D	D	D	P01044		D	D
		N	87	592.742	-0.61343									P01044	D	D	D	P01044			D
34	Lactadherin	N	325	674.621	1.431	Q08431	D	D	D	Q08431	D	D	D
		N	64	380.494	0.056427	Q08431	D	D	D	Q08431	D	D	D
		N	329	674.621	1.431	Q08431	D	D	D	Q08431	D	D	D
		N	228	669.997	-0.58841	Q08431	D	D	D	Q08431	D	D	D
		N	238	397.189	-0.37159	Q08431	D	D	D	Q08431	D	D	D
		N	268	1027	2.0643													Q95114		D	D
		N	227	1278.69	-2.7172									Q95114	D	D	D	Q95114	D	D	D
		N	390	459.543	0.59574													Q95114	D	D
35	Lactoperoxidase	N	212	861.433	0.82251	P22079	D	D		P22079	D	D	D
		N	358;358	762.374	0.10058	P22079	D	D	D	P22079	D	D	D	P80025	D	D	D
		N	212	861.925	3.0531													P80025	D	D
36	Lactotransferrin	N	156	1078.57	-0.38279	P02788	D	D	D	P02788	D	D	D
		N	497	1049.5	-0.52295	P02788	D	D	D	P02788	D	D	D
		N	521	905.895	1.197	P02788	D	D	D	P02788	D	D	D
		N	198	476.718	-0.021747	P02788		D	D
		N	534	905.895	0.67213	P02788	D		D	P02788	D		D
		N	642	679.292	-0.041091	P02788	D		D	P02788	D
		N	198	679.253	-0.81915									P24627	D		D	P24627		D	D
		N	572	1150.84	1.8866													P24627	D		D
		N	252	765.847	-0.81224									P24627	D	D	D	P24627		D	D
		N	564	1020.94	0.12257									P24627	D	D	D	P24627	D	D	D
		N	387	1101.17	0.57257									P24627	D	D	D
		N	495	1259.57	-0.36453									P24627	D	D	D
37	Leucyl-cystinyl aminopeptidase	N	682	795.437	1.5046	Q9UIQ6	D	D	D
		N	834	777.022	-1.0766	Q9UIQ6	D		D	Q9UIQ6	D	D	D
		N	184	604.634	0.71211	Q9UIQ6	D	D
		N	448	917.898	-0.82429	Q9UIQ6		D	D
		N	832	540.268	0.36014									F1N1Q8	D	D	D	F1N1Q8	D	D
38	Leukocyte surface antigen CD47	N	73	491.58	0.026227	Q08722		D	D	Q08722	D	D	D
		N	111	1071.98	-0.78215	Q08722	D	D	D	Q08722	D	D	D
		N	80	603.303	-0.26378									Q9N0K1	D	D	D	Q9N0K1		D	D
		N	50	505.774	0.54501									Q9N0K1	D	D	D	Q9N0K1	D	D	D
		N	109	639.631	-0.036483									Q9N0K1	D	D	D	Q9N0K1		D	D
		N	34	1359.16	-0.071055									Q9N0K1	D	D	D
39	Lysosome-associated membrane glycoprotein 1	N	249	469.245	0.47576	P11279	D	D	D	P11279	D	D	D
		N	322	346.185	-0.54615	P11279	D	D	D	P11279	D	D	D
		N	84	676.658	0.10508	P11279	D	D	D	P11279	D	D	D
		N	103	388.208	0.046995	P11279	D	D		P11279	D	D	D
		N	117	1078.99	0.056842									Q05204		D	D	Q05204	D	D
		N	126	1078.99	0.056842									Q05204		D	D	Q05204	D	D
		N	179	816.891	0.082172									Q05204	D	D	D
		N	314	636.801	0.0020442									Q05204	D	D	D
		N	80	749.867	-0.43439									Q05204	D		D
		N	72	915.409	1.8195									Q05204		D	D
		N	161	984.966	-0.65549									Q05204	D	D	D
		N	299	879.998	-0.67152									Q05204	D	D	D
40	Lysosome membrane protein 2	N	412	857.422	-2.4616	Q14108	D	D	D	Q14108	D		D
		N	249	1011.96	-0.43567	Q14108	D	D	D	Q14108	D	D	D
		N	105	920.452	0.58012	Q14108	D	D	D	Q14108	D	D	D
		N	325	783.879	-0.3529									A6QQP4		D	D
		N	304	1010.5	0.85267									A6QQP4	D		D
		N	105	709.674	0.33879									A6QQP4	D	D	D	A6QQP4		D	D
41	Membrane cofactor protein	N	83	579.591	-0.25917	P15529	D	D	D	P15529	D	D	D
		N	92	1121.88	-1.2165									F6K7I9	D	D	D	F6K7I9		D	D
42	MHC class I antigen	N	110	863.407	-0.17527	Q7YQB3	D	D	D	Q7YQB3	D	D	D
		N	107	996.412	-2.727									O77977	D	D	D	O77977		D	D
43	Monocyte differentiation antigen CD14	N	151	447.222	-0.31802	P08571	D	D	D	P08571	D	D	D
		N	282	1228.1	0.17468	P08571	D	D	D	P08571	D	D	D
		N	280	753.408	-0.06726									Q95122	D	D	D	Q95122		D	D
44	Mucin-15	N	225	516.923	0.95567	Q8N387	D	D	D	Q8N387	D	D	D
		N	89	641.278	0.0085006									Q8MI01		D	D	Q8MI01	D	D	D
		N	94	641.278	0.0085006									Q8MI01	D	D	D	Q8MI01	D	D	D
		N	71	674.787	0.4101									Q8MI01	D	D	D	Q8MI01	D	D	D
		N	44	683.326	-1.6549									Q8MI01	D	D	D	Q8MI01		D	D
		N	221	775.354	0.1399									Q8MI01	D	D	D	Q8MI01	D	D
		N	79	673.293	-0.063453									Q8MI01	D	D	D	Q8MI01	D	D	D
		N	54	575.783	0.08614									Q8MI01	D	D	D	Q8MI01	D	D	D
		N	30	656.804	0.84058									Q8MI01	D	D	D	Q8MI01		D	D
45	Myelin protein zero-like protein 1	N	50;50	583.801	0.68593	O95297	D	D	D	O95297	D	D	D	Q32PI9		D	D	Q32PI9		D	D
46	Myeloperoxidase	N	323	718.331	-0.1129	P05164	D	D	D	P05164	D	D	D
		N	729	983.982	-1.5756	P05164	D	D	D
		N	391	1064.02	0.8071	P05164	D	D	D	P05164	D	D	D
		N	355	788.904	0.30884	P05164	D	D	D	P05164	D
		N	297	719.348	0.0893									A6QPT4	D	D	D	A6QPT4	D	D	D
		N	457	636.621	0.035763									A6QPT4	D	D	D
		N	329	765.43	0.13458									A6QPT4	D	D	D	A6QPT4	D	D	D
47	Nicalin	N	428;428	491.771	-0.73077	Q969V3	D	D	D	Q969V3	D	D	D	Q1LZC3	D	D	D	Q1LZC3		D	D
48	Nicastrin	N	387	792.718	0.12031	Q92542	D	D	D	Q92542	D	D	D
		N	612	833.907	0.36882	Q92542	D	D	D	Q92542	D	D	D
		N	55;55	922.804	0.39841	Q92542	D	D	D	Q92542	D	D	D	Q3SZQ1	D	D	D	Q3SZQ1		D	D
		N	530	669.838	0.41772	Q92542	D	D	D	Q92542	D	D	D
		N	417	854.455	0.86387	Q92542	D	D	D	Q92542	D	D	D
		N	435	884.947	-0.082134	Q92542	D	D	D	Q92542	D	D	D
		N	264	477.584	-0.13615	Q92542	D	D		Q92542		D	D
		N	417	575.316	1.094									Q3SZQ1	D	D	D	Q3SZQ1	D	D	D
		N	530	607.316	0.36357									Q3SZQ1	D	D	D
		N	508	1037.51	0.55879									Q3SZQ1	D	D	D	Q3SZQ1	D	D	D
		N	612	1144.02	-0.60894									Q3SZQ1	D	D	D	Q3SZQ1	D
49	Olfactomedin-4	N	193	475.759	0.40158	Q6UX06	D	D	D	Q6UX06	D		D
		N	352	1196.62	-0.35321	Q6UX06	D	D	D	Q6UX06	D	D	D
		N	411	908.461	4.5512	Q6UX06	D	D	D	Q6UX06	D	D	D
		N	253	1245.3	-0.054323	Q6UX06	D	D	D	Q6UX06	D	D
		N	136	416.263	-0.22554	Q6UX06	D	D	D	Q6UX06	D	D	D
		N	72	1110.52	0.093098	Q6UX06	D	D	D
		N	252	745.032	1.52									F1MVJ8		D	D
		N	410	577.305	0.15535									F1MVJ8	D	D	D	F1MVJ8	D	D	D
		N	351	403.729	0.15939									F1MVJ8	D	D	D	F1MVJ8		D	D
		N	138	416.263	-0.22554									F1MVJ8	D	D	D	F1MVJ8		D	D
		N	195	810.777	-0.4405									F1MVJ8	D	D	D
50	Pituitary tumor-transforming 1 protein-interacting protein	N	54	1159.99	0.42514	P53801	D	D	D	P53801	D	D	D
		N	49	684.8	-1.4049									Q2KI48	D	D	D	Q2KI48		D	D
51	Platelet derived growth factor C	N	55;16	495.603	-0.046328	Q9NRA1	D	D	D	Q9NRA1	D	D	D	E1BJY4	D	D	D	E1BJY4	D	D
52	Platelet glycoprotein 4	N	417	778.746	-0.11308	P16671	D	D	D	P16671	D	D	D
		N	321	824.384	-0.45018	P16671	D	D	D	P16671	D	D	D
		N	205	1118.9	0.089572	P16671	D	D	D	P16671	D	D	D
		N	79	697.086	-0.15929	P16671	D	D	D	P16671	D	D	D
		N	235	795.107	0.03589	P16671	D	D	D	P16671		D	D
		N	247	795.107	0.03589	P16671	D	D	D	P16671		D	D
		N	220	376.529	1.323	P16671	D	D	D	P16671	D	D	D
		N	235	1494.17	-3.0809									P26201	D	D	D	P26201		D	D
		N	79	752.695	0.54593									P26201	D	D	D	P26201		D	D
		N	321	822.405	0.74485									P26201	D	D	D	P26201	D	D	D
		N	205	1424.72	0.11024									P26201	D	D	D
		N	417	1158.09	0.27544									P26201	D	D	D
		N	247	1492.68	1.093									P26201	D	D	D	P26201		D	D
		N	172	436.694	0.60037									P26201	D	D	D	P26201		D	D
53	Polymeric immunoglobulin receptor	N	469	607.317	-1.0227	P01833	D	D	D	P01833	D	D	D
		N	499	997.93	-0.52776	P01833	D	D	D	P01833	D	D	D
		N	421	802.432	0.46619	P01833	D	D	D	P01833	D	D	D
		N	186	1266.14	3.9267	P01833	D	D	D	P01833	D	D	D
		N	83	1407.17	-0.43984	P01833	D	D	D	P01833	D	D	D
		N	90	1407.17	-0.43984	P01833	D	D	D	P01833	D	D	D
		N	135	1090.05	1.142	P01833	D	D	D
		N	468	777.942	0.079883									P81265	D	D	D	P81265	D	D	D
		N	83	609.057	1.0852									P81265	D	D	D	P81265		D	D
		N	420	1351.97	4.8144									P81265	D	D	D	P81265		D	D
54	Prominin-1	N	395	817.418	0.63249	O43490	D	D	D	O43490	D	D	D
		N	220	609.319	-0.087269	O43490	D	D	D
		N	274	626.802	0.47199	O43490	D	D	D	O43490	D	D	D
		N	361	967.957	-1.2973									E9LZ03		D	D	E9LZ03	D	D
		N	580	598.308	0.059454									E9LZ03	D		D
		N	373	967.957	-1.2973									E9LZ03		D	D	E9LZ03	D	D
		N	586	598.308	0.059454									E9LZ03	D		D
55	Protein OS-9	N	177;177	415.519	-0.11822	Q13438	D	D	D	Q13438	D	D	D	Q3MHX6	D	D	D	Q3MHX6	D		D
56	Prothrombin	N	143	679.318	-0.41662	P00734	D	D	D	P00734	D	D	D
		N	121	400.219	0.36284	P00734	D	D	D	P00734	D		D
		N	120	368.198	0.10687													P00735	D	D
		N	144	1018.51	0.54268									P00735	D	D	D
57	Selenoprotein P	N	174	693.641	-1.2676	P49908	D	D	D	P49908	D	D	D
		N	83	1065.02	0.10445	P49908	D	D	D	P49908	D	D	D
		N	83	704.68	1.0385									P49907	D	D	D	P49907		D	D
58	Sodium/glucose cotransporter 1	N	248	862.435	-0.44736	P13866	D	D	D	P13866	D	D	D
		N	248	940.46	0.82592									Q8MKB7	D	D	D	Q8MKB7	D	D	D
59	Tetraspanin-13	N	137	784.352	0.50436	O95857	D		D	O95857	D	D	D
		N	137	808.352	-0.13253									Q3ZBV0	D	D	D	Q3ZBV0	D	D
60	Tetraspanin-3	N	127;127	635.283	0.11709	O60637	D	D	D	O60637	D	D	D	Q3SZR9		D	D	Q3SZR9	D	D
61	Toll-like receptor 2	N	442	478.75	-0.054064	O60603	D	D	D	O60603	D	D	D
		N	199	381.463	-0.38166	O60603	D	D	D	O60603	D	D	D
		N	414	510.777	-0.064159	O60603	D	D	D	O60603	D	D	D
		N	442	461.248	-0.99583									Q95LA9	D	D	D	Q95LA9	D	D	D
		N	114	600.301	0.16065									Q95LA9	D	D	D	Q95LA9		D	D
		N	199	759.948	1.6956									Q95LA9	D	D	D
62	Toll-like receptor 4	N	282	877.929	1.9973	O00206	D	D	D	O00206	D	D	D
		N	173	779.721	1.0799					O00206	D		D
		N	526	744.117	-0.00055407									Q9GL65	D	D	D
		N	73	762.718	-0.02121									Q9GL65	D	D	D
		N	238	577.263	-0.19454									Q9GL65	D	D	D	Q9GL65		D	D
		N	282	915.453	0.10053									Q9GL65	D	D	D
63	Translocon-associated protein subunit beta	N	88;88	452.019	0.34505	P43308	D	D	D	P43308	D	D	D	Q5E9E4	D	D	D	Q5E9E4	D	D	D
64	Transmembrane emp24 domain-containing protein 4	N	131	816.041	0.064395	Q7Z7H5	D	D	D	Q7Z7H5	D	D	D	A4FV10	D	D	D	A4FV10	D	D	D
65	Transmembrane emp24 domain-containing protein 9	N	125;125	1216.56	2.1637	Q9BVK6	D	D	D	Q9BVK6	D	D	D	Q3T133	D	D	D	Q3T133	D	D	D
66	Transmembrane protease serine 2	N	249	677.31	-1.5742	O15393	D	D	D	O15393		D	D
		N	213	475.921	2.2768	O15393	D	D	D	O15393	D	D	D
		N	211	691.358	-1.0482									A2VDV7	D	D		A2VDV7	D	D
67	Tumor necrosis factor receptor superfamily member 1A	N	54	819.368	-0.0093571	P19438	D	D	D	P19438	D	D	D
		N	54	813.35	1.8103									O19131	D	D	D	O19131		D	D
68	Tyrosine-protein phosphatase non-receptor type substrate 1	N	270	710.84	-0.66363	P78324	D	D	D	P78324	D	D	D
		N	245;246	532.777	-0.16469	P78324	D	D	D	P78324	D	D	D	O46631	D	D	D	O46631		D	D
		N	110	873.419	-1.54	P78324	D	D	D	P78324	D	D	D
		N	292	768.395	1.881	P78324	D	D	D	P78324	D	D	D
		N	290	852.911	1.3937									O46631	D	D	D	O46631	D
		N	292	852.911	1.3937									O46631	D	D	D	O46631	D
		N	92	365.196	1.1095									O46631	D	D	D	O46631	D	D	D
		N	110	887.434	-0.13998									O46631	D	D	D	O46631	D	D
		N	167	713.993	1.0605									O46631	D	D	D	O46631	D		D
		N	344	613.817	0.093642									O46631	D	D		O46631			D
		N	270	871.774	0.17885									O46631	D	D	D	O46631		D	D
69	V-type proton ATPase subunit S1	N	261	693.025	-0.57612	Q15904	D	D	D	Q15904	D	D	D
		N	170	648.91	-0.55816	Q15904	D		D	Q15904	D	D	D
		N	404	778.896	-0.41042									P40682	D	D	D	P40682	D	D	D

## Sheet: Sheet3
Table S3. MFGM N-glycoproteins uniquely identified in human and bovine colostrum and mature milk.
Protein name	Amino acid	Positions within proteins	m/z	Mass error [ppm]	Uniprot Acession	Intensity HC_1	Intensity HC_2	Intensity HC_3	Uniprot Acession	Intensity HM_1	Intensity HM_2	Intensity HM_3	Uniprot Acession	Intensity BC_1	Intensity BC_2	Intensity BC_3	Uniprot Acession	Intensity BM_1	Intensity BM_2	Intensity BM_3
ADP-ribosyl cyclase/cyclic ADP-ribose hydrolase 2	N	192	1138.06	-0.090776	Q10588	D	D	D
	N	66	742.858	0.82069	Q10588	D	D	D
Alpha-1-acid glycoprotein 2	N	93	962.431	-4.5031	P19652	D	D	D
Alpha-galactosidase A	N	192	472.747	0.2172	P06280	D	D	D
Amyloid beta A4 protein	N	542	1064.54	0.97511	P05067		D	D
Amyloid-like protein 2	N	541	612.845	0.072673	Q06481		D	D
Beta-1,3-N-acetylglucosaminyltransferase radical fringe	N	113	568.784	-0.59628	Q9Y644	D		D
Beta-galactosidase	N	464	595.337	-0.26392	P16278	D	D
C4b-binding protein alpha chain	N	506	995.209	0.51625	P04003	D	D	D
	N	528	995.209	0.51625	P04003	D	D	D
	N	221	844.661	0.75693	P04003	D	D
Carcinoembryonic antigen-related cell adhesion molecule 6	N	224	999.921	0.31891	P40199	D	D	D
Cathepsin L1	N	221	764.874	0.80448	P07711	D	D	D
C-C motif chemokine 28	N	78	647.827	0.98917	Q9NRJ3		D	D
CD48 antigen	N	104	743.858	-1.306	P09326	D	D	D
	N	162	1045.98	0.76362	P09326	D	D
Complement receptor type 1	N	578	404.517	-0.17556	P17927	D	D	D
	N	897	483.21	-0.10003	P17927		D	D
C-type lectin domain family 12 member A	N	80	616.822	1.9723	Q5QGZ9	D	D	D
Cyclic AMP-dependent transcription factor ATF-6 alpha	N	584	681.867	0.7313	P18850	D	D	D
Deleted in malignant brain tumors 1 protein	N	1889	763.88	0.36952	Q9UGM3		D	D
Desmoglein-1	N	110	660.848	0.70736	Q02413	D	D	D
Disintegrin and metalloproteinase domain-containing protein 17	N	539	599.26	-1.0794	P78536	D	D
	N	174	525.769	0.23874	P78536	D	D	D
Disintegrin and metalloproteinase domain-containing protein 8	N	612	667.265	-0.65191	P78325	D		D
EMILIN-3	N	732	728.857	1.3558	Q9NT22		D	D
Fibrillin-1	N	1902	507.187	-0.051058	P35555	D		D
Growth arrest-specific protein 6	N	463	633.34	-0.20756	Q14393	D	D
HLA class II histocompatibility antigen, DQ alpha 1 chain	N	103	942.46	-1.1529	P01909	D	D
HLA class II histocompatibility antigen, DQ beta 1 chain	N	51	676.778	-0.12179	P01920	D	D	D
HLA-C protein	N	110	545.738	0.053416	Q96QL3		D	D
HLA-DQA1 protein	N	104	980.475	0.68579	A0A0C7DW92	D	D	D
HLA-DRB1 antigen	N	4	505.732	0.46012	P79499	D	D	D
Ig gamma-2 chain C region	N	176	580.759	0.15072	P01859	D	D	D
Integrin alpha-X	N	899	816.428	-0.35764	P20702	D	D	D
	N	939	624.779	-0.20141	P20702	D	D	D
Laminin subunit beta-1	N	1279	700.898	-0.88201	P07942	D	D	D
	N	677	407.203	0.29759	P07942	D	D	D
L-amino-acid oxidase	N	54	474.263	0.021746	Q96RQ9	D	D
	N	134	610.334	0.10933	Q96RQ9	D	D	D
Left-right determination factor 2	N	158	307.814	0.076068	O00292	D		D
Leukocyte surface antigen CD53	N	129	318.806	0.4787	P19397		D	D
Low-density lipoprotein receptor-related protein 10	N	299	356.51	0.020372	Q7Z4F1	D	D	D
Macrosialin	N	279	1114.58	0.4226	P34810	D	D	D
Melanotransferrin	N	135	474.216	0.27613	P08582	D	D	D
MHC class II HLA-DR-beta	N	11	622.921	0.81994	P79550	D	D	D
Mucin-20	N	622	397.711	0.33999	Q8N307		D	D
N-acetylglucosamine-1-phosphotransferase subunits alpha/beta	N	684	416.196	-0.4089	Q3T906	D	D	D
Natural resistance-associated macrophage protein 2	N	336	806.721	-0.47775	P49281	D	D
Neprilysin	N	145	627.779	-0.04069	P08473	D	D	D
Neuroserpin	N	157	667.335	0.16228	Q99574	D	D	D
	N	321	575.777	-0.44839	Q99574	D	D
Neutrophil elastase	N	173	1031.56	-0.11884	P08246	D	D	D
	N	88	534.806	0.84786	P08246	D	D	D
P2X purinoceptor 7	N	202	776.357	2.5468	Q99572	D	D	D
	N	284	767.875	2.0558	Q99572		D	D
Peptidyl-prolyl cis-trans isomerase C	N	190	716.958	0.65227	P45877		D	D
Platelet endothelial cell adhesion molecule	N	453	397.213	0.68885	P16284	D	D
Prolactin-inducible protein	N	105	708.311	0.13821	P12273	D	D	D
Protein FAM3B	N	208	522.764	-0.40515	P58499	D		D
Protein tweety homolog 3	N	144	780.729	-0.72132	Q9C0H2		D	D
Protocadherin gamma-B2	N	545	709.362	-0.94739	Q9Y5G2	D	D
Receptor-type tyrosine-protein phosphatase C	N	421	716.844	-0.32801	P08575	D	D	D
	N	531	700.352	-0.7636	P08575		D	D
	N	234	740.366	0.81381	P08575		D	D
Retinoic acid receptor responder protein 1	N	142	532.768	0.32895	P49788	D	D	D
Ribonuclease A F1	N	119	765.38	-0.49772	W0UUR6	D	D	D
Ribonuclease K6	N	55	763.834	-0.7572	Q93091	D	D	D
	N	100	498.212	-0.10672	Q93091	D	D	D
Ribonuclease T2	N	212	1043.97	-1.3593	O00584	D	D
Sialic acid-binding Ig-like lectin 5	N	375	876.93	-0.16027	O15389	D	D	D
Sodium/hydrogen exchanger 1	N	75	526.596	-0.041457	P19634	D	D	D
Sodium/iodide cotransporter	N	225	635.343	1.1246	Q92911	D	D	D
Solute carrier family 15 member 4	N	140	715.353	0.16157	Q8N697		D	D
Sushi domain-containing protein 2	N	162	475.737	-0.38819	Q9UGT4	D	D	D
	N	494	676.803	0.51712	Q9UGT4	D	D	D
TMEM106B protein	N	223	715.894	0.44998	Q8N353	D	D	D
Toll-like receptor 5	N	422	805.941	-0.48382	O60602	D	D	D
	N	37	963.474	0.93429	O60602	D	D	D
	N	46	963.474	0.93429	O60602	D	D	D
Toll-like receptor 8	N	42	508.572	0.28407	Q9NR97	D	D	D
	N	293	578.808	-0.35941	Q9NR97		D	D
	N	285	620.832	-0.81464	Q9NR97		D	D
Transforming growth factor beta-1	N	176	465.204	-0.60213	P01137	D	D
Tumor necrosis factor receptor superfamily member 3	N	177	454.881	-0.040043	P36941	D	D	D
Vasorin	N	117	421.547	-0.74409	Q6EMK4	D		D
V-set domain-containing T-cell activation inhibitor 1	N	112	832.449	1.2554	Q7Z7D3	D		D
ADAMTS-like protein 3	N	927	667.894	0.089345					P82987	D	D	D
	N	1574	509.452	0.50345					P82987	D	D
Allergin-1	N	89	721.688	0.63209					Q7Z6M3		D	D
Alpha-L-iduronidase	N	372	457.002	-0.47731					P35475		D	D
Atrial natriuretic peptide-converting enzyme	N	245	562.757	-1.0614					Q9Y5Q5	D	D
	N	376	680.608	0.43241					Q9Y5Q5	D	D
Brain-specific serine protease 4	N	70	505.24	1.6395					Q9GZN4	D	D	D
Carboxylesterase 3	N	105	1099.97	1.4298					Q6UWW8	D	D
Cysteine-rich with EGF-like domain protein 2	N	190	907.847	1.2808					Q6UXH1		D	D
Dipeptidase 1	N	279	782.404	-0.10973					P16444	D	D	D
	N	57	777.922	0.81606					P16444	D	D	D
Endoplasmic reticulum aminopeptidase 1	N	414	996.463	0.12728					Q9NZ08	D	D	D
Endothelin-converting enzyme 1	N	166	823.399	-1.2577					P42892	D	D
Ephrin-B2	N	36	870.44	1.1997					P52799	D		D
ER membrane protein complex subunit 7	N	184	568.761	-0.07635					Q9NPA0		D	D
ERO1-like protein beta	N	140	669.848	2.4641					Q86YB8	D	D
	N	145	669.848	2.4641					Q86YB8	D	D
Galactoside 3(4)-L-fucosyltransferase	N	185	1071.85	0.45741					P21217	D		D
Glucoside xylosyltransferase 1	N	237	686.998	0.71665					Q4G148	D	D	D
Glycosyltransferase 8 domain-containing protein 1	N	257	545.785	0.23923					Q68CQ7		D	D
Hemicentin-1	N	2395	552.787	-0.54546					Q96RW7		D	D
Heparan-alpha-glucosaminide N-acetyltransferase	N	461	759.332	0.21307					Q68CP4	D		D
HLA class I histocompatibility antigen, B-54 alpha chain	N	110	985.073	-0.69596					P30492	D	D
HLA class I histocompatibility antigen, B-7 alpha chain	N	110	956.729	-0.19342					P01889	D	D	D
HLA class II histocompatibility antigen, DRB1-8 beta chain	N	48	1061.95	0.062991					Q30134	D	D	D
Ig delta chain C region	N	367	389.221	-0.21664					P01880	D	D	D
Immunoglobulin superfamily member 8	N	463	711.861	0.067914					Q969P0	D	D	D
Inactive N-acetylated-alpha-linked acidic dipeptidase-like protein 2	N	534	1060.06	-1.0403					Q58DX5		D	D
Integrin alpha-1	N	460	683.854	-0.12785					P56199	D	D
Interleukin-1 receptor type 1	N	193	546.577	1.1322					P14778	D	D	D
Kallikrein-6	N	134	905.393	0.91531					Q92876	D	D	D
Kallistatin	N	157	710.831	-0.28181					P29622	D	D	D
Kunitz-type protease inhibitor 2	N	94	835.383	-0.33817					O43291	D	D	D
Latent-transforming growth factor beta-binding protein 3	N	349	760.983	-0.46379					Q9NS15	D		D
Latent-transforming growth factor beta-binding protein 4	N	352	864.838	0.79857					Q8N2S1	D		D
LEM domain-containing protein 2	N	311	763.361	-0.76178					Q8NC56		D	D
Lysosomal alpha-mannosidase	N	766	969.976	0.62895					O00754		D	D
Membrane protein FAM174A	N	83	1029.45	-0.26234					Q8TBP5	D	D	D
Myeloid cell surface antigen CD33	N	113	504.719	0.024147					P20138	D	D
	N	99	626.298	0.3958					P20138	D	D	D
	N	100	626.298	0.3958					P20138	D	D	D
	N	209	936.152	0.42659					P20138	D	D	D
Neutral amino acid transporter B(0)	N	212	594.279	-1.3545					Q15758	D	D	D
Plasma kallikrein	N	494	750.729	0.01691					P03952	D	D	D
Platelet-derived growth factor receptor-like protein	N	219	784.874	-1.7372					Q15198	D	D	D
Procollagen-lysine,2-oxoglutarate 5-dioxygenase 2	N	696	564.747	-0.15828					O00469		D	D
Proline synthase co-transcribed bacterial homolog protein	N	146	712.845	2.1043					O94903	D	D	D
Prolyl 3-hydroxylase 1	N	540	588.973	-0.6512					Q32P28	D	D	D
Protein CREG1	N	160	576.771	0.7673					O75629		D	D
Protein FAM234B	N	396	782.88	0.93669					A2RU67	D	D	D
Protein GPR107	N	169	1085.53	0.8818					Q5VW38	D	D	D
SID1 transmembrane family member 1	N	282	596.286	0.48428					Q9NXL6	D	D
TGF-beta receptor type-2	N	94	639.303	1.1958					P37173	D	D	D
TM2 domain-containing protein 3	N	157	423.208	-0.37917					Q9BRN9		D	D
Transforming growth factor beta-2	N	140	552.611	-0.63284					P61812	D	D
ADAM like decysin 1	N	195	635.62	0.46564									F1MJP4	D	D
ADAM metallopeptidase domain 9	N	119	802.149	0.42499									F1MZJ5	D	D	D
	N	129	802.149	0.42499									F1MZJ5	D	D	D
	N	611	1145.52	1.7904									F1MZJ5		D	D
Adhesion G protein-coupled receptor E1	N	574	504.714	-0.36288									E1BNX3	D	D	D
	N	710	436.714	-0.59742									E1BNX3	D	D	D
Adhesion G protein-coupled receptor G6	N	245	704.292	-0.27576									F1MJV6	D	D	D
	N	291	562.299	0.1365									F1MJV6	D	D	D
	N	719	503.25	0.17846									F1MJV6	D		D
Alpha-2-macroglobulin	N	1460	721.731	0.73565									Q7SIH1		D	D
Alpha-mannosidase	N	1093	665.303	-0.40323									E1BGJ4	D	D	D
Amine oxidase [flavin-containing]	N	270	622.366	1.1878									F1MZA0	D	D	D
	N	195	695.632	0.06394									F1MZA0	D	D	D
	N	357	756.856	-0.248									F1MZA0		D	D
Apolipoprotein B	N	3683	510.782	-0.12225									E1BNR0	D	D
	N	3938	453.719	0.76079									E1BNR0	D	D	D
	N	1520	837.902	-0.30854									E1BNR0		D	D
Aspartylglucosaminidase	N	53	953.104	0.78298									Q1RMN0		D	D
Beta-1,4-N-acetylgalactosaminyltransferase	N	101	486.73	0.13952									F1N0M7	D	D	D
Beta-hexosaminidase subunit alpha	N	157	572.774	0.49316									Q0V8R6	D	D	D
Biglycan	N	312	554.646	-0.41744									P21809	D	D	D
	N	271	790.916	-0.57138									P21809	D	D
BoLa class II histocompatibility antigen, DQB*0101 beta chain	N	51	660.792	0.3097									Q9TVC8	D	D	D
Bone morphogenetic protein 3	N	119	473.597	-0.47243									P22444	D	D	D
	N	177	545.029	0.66675									P22444	D	D	D
Carboxypeptidase B2	N	108	625.299	0.76576									Q2KIG3	D	D	D
CD166 antigen	N	167	745.328	0.41069									Q9BH13	D	D	D
CD44 antigen	N	57	879.408	0.36762									Q29423	D	D	D
CD58 protein	N	104	762.911	0.25413									A7YW37	D	D	D
CD74 molecule, major histocompatibility complex, class II invariant chain	N	118	601.632	-0.27176									Q29630	D	D	D
Cholinesterase	N	369	468.238	-0.0097994									P32749	D	D	D
Coagulation factor IX	N	307	740.869	0.47899									P00741	D	D	D
Collagen type V alpha 1 chain	N	139	603.836	1.1347									G3MZI7	D	D
Collagen type XIV alpha 1 chain	N	373	689.329	-0.023652									E1BA17	D	D	D
Complement C2	N	652	583.801	-0.46117									Q3SYW2	D	D	D
Complement factor B	N	122	776.364	3.0033									P81187	D	D	D
Complement factor properdin	N	428	782.384	-2.286									Q17QC8		D	D
CPM protein	N	38	624.655	0.63469									A7MBD9	D	D	D
Cysteine-rich, angiogenic inducer, 61	N	83	742.85	1.0732									Q3ZC35	D	D	D
Desmoglein 2	N	175	803.378	0.70418									F1MFC2		D	D
Dickkopf-like 1 (Soggy)	N	88	514.938	0.084897									Q2YDK6	D	D	D
DKK3 protein	N	106	383.872	0.24312									A6QL81	D	D	D
	N	204	792.844	-0.36083									A6QL81	D		D
DPP7 protein	N	433	660.858	0.26865									A6QNX2	D	D	D
DR-beta chain MHC class II	N	11	617.589	0.44886									Q30274		D	D
Dystroglycan	N	141	843.407	0.30516									O18738	D	D	D
Embigin	N	68	745.727	-0.048614									F1MF38	D	D	D
	N	140	1093.85	-0.82475									F1MF38		D	D
	N	147	1093.85	-0.82475									F1MF38		D	D
EMID1 protein	N	51	833.399	0.9599									A6QPG8	D		D
Endoglin	N	130	750.063	-0.053721									Q1RMV1	D	D
ENTPD2 protein	N	319	620.293	-0.10769									A7YWN0	D	D	D
	N	378	1139.59	1.4515									A7YWN0	D	D
Factor XIIa inhibitor	N	176	837.421	2.3042									P50448	D	D	D
FAM20C, golgi associated secretory pathway kinase	N	438	545.939	0.25096									F1MXQ3	D	D	D
Fc gamma receptor I	N	209	746.679	-0.072813									Q9MZT0		D	D
Fibrinogen gamma-B chain	N	76	705.374	0.12278									P12799	D	D	D
Fibroblast growth factor receptor like 1	N	205	456.24	-0.43081									F1MQI5	D	D	D
Fibroleukin	N	338	525.598	-0.40078									Q29RY7	D	D	D
	N	265	500.235	0.74486									Q29RY7	D	D	D
Fibromodulin	N	166	421.219	0.30376									P13605	D	D	D
	N	201	831.667	0.71387									P13605	D	D
Fibulin-1	N	98	657.81	0.12171									A5D7S8		D	D
FOLH1 protein	N	76	532.769	-1.5157									A6QLT8	D	D	D
	N	613	667.813	0.10179									A6QLT8	D	D	D
	N	638	710.822	0.64406									A6QLT8	D	D	D
	N	645	710.822	0.64406									A6QLT8	D	D	D
	N	476	640.651	-0.35608									A6QLT8	D	D	D
Glycosylated lysosomal membrane protein	N	185	728.851	0.46702									Q0P5L7	D		D
Glypican-1	N	116	425.214	-0.55496									G3X745	D	D	D
	N	79	1218.49	-2.511									G3X745		D	D
HAPLN3 protein	N	65	495.75	-0.14995									A5PK97	D	D	D
HHIP like 2	N	480	807.738	-0.62639									E1BGX8	D	D	D
Interleukin 6 signal transducer	N	83	783.906	1.2414									E1BD36		D	D
Laminin subunit alpha 1	N	510	500.255	0.077276									F1MEG3	D	D	D
	N	1993	561.798	1.0739									F1MEG3		D	D
Laminin subunit alpha 2	N	1991	544.298	-0.60334									F1MMT2	D	D	D
	N	52	742.328	-0.060201									F1MMT2	D	D	D
Laminin subunit alpha 5	N	2264	756.899	0.47369									F1MC13	D	D
	N	2157	796.402	0.46797									F1MC13	D	D
LDL receptor related protein 2	N	3418	835.467	0.34476									F1N6H1	D	D	D
	N	4300	373.193	0.12703									F1N6H1	D	D	D
	N	3951	947.89	-0.44481									F1N6H1	D	D	D
	N	1472	699.351	0.1883									F1N6H1	D	D	D
	N	2197	508.224	0.62108									F1N6H1	D	D	D
	N	2802	612.784	-0.57658									F1N6H1	D	D	D
	N	151	455.19	-0.36308									F1N6H1	D	D	D
	N	1526	993.044	0.73601									F1N6H1	D		D
	N	132	1198.5	-0.71359									F1N6H1	D	D	D
	N	315	1052.45	-0.42828									F1N6H1	D	D	D
	N	3286	732.982	0.052307									F1N6H1	D	D	D
	N	3228	493.237	1.2659									F1N6H1	D	D	D
	N	3653	663.747	-0.11929									F1N6H1	D	D	D
	N	2958	885.353	1.4717									F1N6H1	D	D
	N	4041	1062.49	0.084511									F1N6H1	D	D	D
	N	1118	600.493	-0.27978									F1N6H1	D		D
	N	1651	677.615	0.33068									F1N6H1		D	D
	N	3537	960.394	-0.40627									F1N6H1		D	D
	N	2918	665.628	0.41399									F1N6H1		D	D
Lecithin-cholesterol acyltransferase	N	44	310.822	0.48608									Q2KIW4	D	D
Lipase	N	321	658.647	0.64236									A6H713	D		D
LOC618591 protein	N	83	791.693	-0.26808									A6QQ73	D	D	D
	N	90	791.693	0.050362									A6QQ73	D	D	D
Lymphocyte antigen 75 precursor	N	866	554.274	0.17479									E1BC77	D	D	D
	N	935	458.735	-0.28459									E1BC77	D	D	D
LYPD3 protein	N	165	929.422	0.69129									A4FUZ7	D	D	D
Lysosomal protective protein	N	144	995.96	1.7694									Q3MI05	D	D
Lysosomal-associated membrane protein 2	N	254	1390.69	-1.4426									Q3SZJ7	D	D
	N	257	1390.69	-1.4426									Q3SZJ7	D	D
	N	75	1294.08	-0.061859									Q3SZJ7	D	D
	N	61	569.767	-0.017345									Q3SZJ7	D	D	D
	N	49	549.768	0.31816									Q3SZJ7		D	D
Mannan binding lectin serine peptidase 2	N	103	1017.47	-0.69576									E1BJ49	D	D	D
Membrane tyrosine phosphatase	N	292	669.351	0.44242									Q9GMB4	D	D	D
	N	234	1123	0.26492									Q9GMB4	D	D	D
Metalloendopeptidase	N	365	744.886	-0.37525									E1BEV7	D	D	D
	N	93	727.687	-0.27855									E1BEV7	D		D
MHC class I heavy chain	N	81	950.75	0.5672									O78058	D	D	D
MHC class II antigen beta chain (Fragment)	N	13	704.307	-2.0998									V5RF39	D	D	D
NAGLU protein	N	503	682.261	-0.052883									A6QM01	D	D	D
Oxidized low-density lipoprotein receptor 1	N	69	770.064	0.24156									P79391	D	D	D
P2X purinoceptor	N	273	620.286	0.52136									E1BIP1	D	D	D
	N	128	879.02	-0.33108									E1BIP1		D	D
Pantetheinase	N	201	736.364	-0.30067									Q58CQ9	D	D	D
	N	147	782.306	0.48953									Q58CQ9		D	D
PCYOX1 protein	N	356	600.293	0.65316									A6QPR1	D	D	D
	N	199	598.309	-0.66413									A6QPR1	D	D	D
Phosphatidylinositol-glycan-specific phospholipase D	N	658	540.275	-1.8303									P80109	D	D
Platelet-activating factor receptor	N	169	411.714	0.03619									Q9TTY5	D	D	D
	N	4	499.218	-0.65945									Q9TTY5	D	D	D
Protein HP-25 homolog 2	N	118	1003.47	-0.044694									Q2KIU3	D		D
	N	152	482.248	0.61361									Q2KIU3		D	D
Protein tweety homolog	N	144	560.288	0.04824									F1N1D4	D	D	D
RNASE2 protein	N	86	773.701	-0.89487									A5PJY7	D	D	D
	N	110	767.346	-0.35233									A5PJY7	D	D	D
	N	99	1142.52	-0.22058									A5PJY7	D	D	D
	N	117	881.895	2.7909									A5PJY7	D	D	D
Serine protease 22	N	70	505.24	1.6395									E1BNJ9	D	D	D
Serine protease 8	N	229	764.017	0.23655									F1MUB9	D	D	D
Serpin A3-4	N	318	866.403	0.11959									A2I7N0	D	D	D
Serpin A3-8	N	103	555.272	0.33747									A0A0A0MP89	D	D	D
SERPINA10 protein	N	303	645.852	-0.73879									A5PJ69		D	D
SERPIND1 protein	N	420	392.195	-0.7654									A6QPP2	D	D	D
SHBG protein	N	395	1163.51	0.20822									A5PKC2	D	D	D
Signal recognition particle receptor subunit alpha	N	44	497.916	-0.082014									Q3MHE8	D	D	D
Solute carrier family 7 member 4	N	151	743.728	0.048989									E1BCI3		D	D
Sparc/osteonectin, cwcv and kazal-like domains proteoglycan (Testican) 1	N	289	669.974	-0.21283									Q17QR9	D	D	D
Sulfotransferase	N	247	823.409	-1.2311									Q0VCB5	D		D
Suppressor of tumorigenicity 14 protein homolog	N	489	662.271	0.18163									Q0IIH7	D	D	D
	N	772	717.709	1.1342									Q0IIH7		D	D
Thyroxine-binding globulin	N	34	863.932	-0.040451									Q9TT36	D	D	D
Transcription factor AEBP1	N	504	860.457	0.29376									O97567	D	D	D
Transforming growth factor beta receptor 3	N	533	676.86	1.2401									E1B9H5	D	D	D
	N	454	679.982	-0.7704									E1B9H5	D	D	D
Transient receptor potential cation channel, subfamily V, member 2	N	566	916.923	-0.27504									Q5EA32		D	D
Tubulointerstitial nephritis antigen like	N	163	622.289	-0.17007									E1B9H1		D	D
Uncharacterized protein E1BIW1	N	179	835.443	1.1571									E1BIW1	D	D	D
Uncharacterized protein F1MDC1	N	607	590.792	0.56726									F1MDC1	D	D	D
	N	785	631.991	-0.16402									F1MDC1	D	D	D
Uncharacterized protein F1MGC2	N	117	573.731	0.026969									F1MGC2	D	D	D
	N	117	573.731	0.026969									F1MGC2	D	D	D
Uncharacterized protein F1MI18	N	869	791.404	0.52462									F1MI18		D	D
Uncharacterized protein F1MK01	N	120	1115.01	-0.20781									F1MK01	D	D	D
Uncharacterized protein F1MYX9	N	578	741.041	-0.62431									F1MYX9	D	D	D
	N	810	430.233	0.31188									F1MYX9	D	D	D
	N	742	688.369	-0.18331									F1MYX9	D	D	D
	N	787	992.036	1.144									F1MYX9	D	D	D
	N	531	603.796	0.52777									F1MYX9	D	D	D
Uncharacterized protein G3N2R7	N	63	528.938	0.65624									G3N2R7	D	D	D
Uncharacterized protein G3N342	N	92	671.846	-0.66632									G3N342	D	D	D
	N	245	490.258	0.42532									G3N342		D	D
Uncharacterized protein G3X6I0	N	1699	921.943	-1.432									G3X6I0	D	D
Uncharacterized protein G3X7F3	N	309	825.043	-0.77652									G3X7F3	D	D	D
Uncharacterized protein G5E6Q9	N	165	510.224	-0.9439									G5E6Q9	D	D	D
UPF0454 protein C12orf49	N	67	562.783	-2.8663									Q17QN8	D	D	D
Urokinase plasminogen activator surface receptor	N	179	674.818	0.50832									Q05588		D	D
ATP-binding cassette sub-family G member 2	ATP-binding cassette sub-family G member 2	67	818.449	-0.85537													Q4GZT4		D	D
	N	17	595.829	-0.25486													Q4GZT4		D	D
CD109 molecule	N	118	692.335	-3.9925													F1MPE1	D	D
Ectonucleotide pyrophosphatase/phosphodiesterase family member 3	N	686	836.644	-0.48492													P15396	D	D	D
	N	698	836.644	-0.96756													P15396	D	D	D
	N	677	1115.19	-0.62567													P15396	D	D	D
	N	279	1211.6	-0.3677													P15396	D	D	D
Leucine rich repeat containing 8 family, member A	N	76	502.187	0.16084													Q08E42	D	D
	N	83	1382.67	-1.2096													Q08E42	D	D
PCDHGB4 protein	N	543	481.576	0.63377													A6QNV3	D	D	D
Plexin B2	N	127	417.732	0.13525													G3X755	D	D
	N	1073	811.105	1.1209													G3X755	D	D
SEL1L ERAD E3 ligase adaptor subunit	N	654	741.354	0.349													F1MGJ5		D	D
NBL1, DAN family BMP antagonist	N	38	758.869	-0.42602													F1MNJ9	D	D
Sodium- and chloride-dependent creatine transporter 1	N	192	1156.47	-0.01403													O18875	D	D
	N	197	1156.47	-0.01403													O18875	D	D
Solute carrier family 22 (Organic cation/carnitine transporter), member 5	N	57	660.327	0.13775													Q2KJE9	D	D
TM2 domain containing 1	N	195	542.282	-0.21507													Q2KI73		D	D
UNC84B protein	N	647	646.335	0.77482													A6QLV1	D	D	D
Uncharacterized protein	N	46	789.372	0.15702													G3N033	D	D	D
